# Supplementary material for: Molecular analysis of ex-vivo CD133+ GBM cells revealed a common invasive and angiogenic profile but different proliferative signatures among high grade gliomas
Source: BMC Cancer. 2010 Aug 24;10:454. doi: 10.1186/1471-2407-10-454 (PMC2939550; doi:10.1186/1471-2407-10-454)
Supplement: Additional file 4 — CGH-array data set. Chromosomal gains and losses from tumour bulk cells of GBM patients are shown in this table. Each column shows the median of Cy5/Cy3 ratio intensity of triplicate spots of each clone normalized by GEPAS. [file 1471-2407-10-454-S4.XLS]

## Sheet: Hoja1
							Patients code
Chromosome Location	Start	End	Clones	G2	G4	G5	G6	G7	G8	G9	G11
1	200000	300000	PAC14E10	0.451336	1.27436	1.01456	-0.347312	0.321078	-0.147355	0.550819	0.685185
1	1882697	1993696	bA128G13	0.224293	-0.459718	-0.578087	0.14229	0.353008	0.0741226	0.167914	-0.34178
1	2798444	2939015	dJ785P20	0.307097	-0.0328324	0.732646	0.124797	0.479232	0.0602765	-0.248774	0.0845855
1	3055522	3281103	bA465B22	-0.941424	-0.0175347	0.324185	2.44206	0.0166987	-1.00105	0.657301	0.467449
1	4037825	4169251	dJ37J18	-0.562635	-0.558747	0.433893	-0.700818	-0.370437	0.731908	-0.477577	-0.0308257
1	5540284	5640585	bA49J3	-0.383456	0.198749	0.35391	-0.633116	0.121888	-1.17204	-0.106812	0.355321
1	6734038	6821137	dJ438L4	-0.74721	-0.630241	0.806812	-0.83616	-0.363689	0.539759	-0.301301	0.156924
1	7315652	7381573	bA338N10	-0.590646	-0.379093	NaN	-0.165219	-0.180609	-1.31597	-0.335761	-0.0198229
1	8809267	8938415	dJ510D11	0.0661356	-0.165504	-0.658955	-1.08387	-0.23557	-0.94338	-0.367427	0.243364
1	9762410	9856831	dJ575L21	-0.804606	-0.519779	-0.520132	-0.560278	-0.453462	-0.914428	-0.217974	0.223391
1	10673125	10785893	dJ635E18	0.14187	-0.416456	-0.130835	0.118224	0.372719	0.293702	-0.0789074	-0.442572
1	11173933	11295564	dJ539L13	NaN	0.024932	-0.776313	-0.988769	-0.247183	-1.08487	-0.6593	-0.0664115
1	11469325	11619108	bA196P5	-0.0853108	-0.145598	-0.264385	-0.344275	0.0180788	-0.186244	-0.229216	-0.342878
1	12009545	12064290	dJ636F13	-0.890806	-0.418264	-1.76139	-0.847005	-0.79949	0.376093	-0.431377	0.0756968
1	14009040	14086229	bA285P3	0.514926	-0.426844	1.32182	-0.302448	-0.305687	-0.447166	-0.164062	0.000860113
1	14845657	14876761	dJ560M15	-0.953907	0.314183	-0.354507	-0.756304	-0.149518	-1.01699	-0.512456	0.422528
1	16220363	16436859	dJ37C10	-0.85684	-0.133298	-0.579825	-0.73592	-0.227287	-0.973119	-0.31196	0.425716
1	16532955	16679672	bA45I3	0.285948	-0.110187	-0.854976	-0.388145	-0.408663	0.700185	0.094502	0.149641
1	17492124	17607414	bA174G17	-0.309007	-0.310119	-0.409536	-0.0752033	-0.170948	-0.158734	-0.268923	0.0893321
1	18457869	18532105	dJ540O3	NaN	-0.0621018	0.212546	-0.812255	-0.540197	-1.21337	-0.598335	0.110553
1	19753442	19834208	dJ745E8	-0.936385	0.200411	0.174202	-0.970578	-0.511026	-0.364233	-0.466271	-0.0191805
1	21195339	21370500	bA132G19	-0.243877	-0.151027	0.131259	-0.219019	0.0268475	-0.326892	-0.222582	0.173351
1	22483929	22584879	dJ184J9	-0.775379	-0.181322	-0.945333	-0.863813	-0.48888	-0.823261	-0.391306	0.230111
1	23683687	23693148	bA509F14	-0.764093	0.0828358	-0.21033	-0.577746	-0.417454	-0.942244	-0.406809	0.156467
1	24170966	24266206	dJ398I9	-0.160148	-0.0728335	-0.17265	-0.263074	0.228993	2.46722	-0.236419	0.0431892
1	26591978	26712987	dJ633N17	-0.871537	-0.155857	-0.65347	-1.279	-0.385426	-1.40615	-0.547067	0.0577455
1	26935780	27013101	dJ144C9	-0.211574	-0.376651	-1.08532	-0.93132	-0.359169	-1.06175	-0.388818	-0.0443397
1	27088769	27214055	dJ159A19	0.723254	0.228399	0.171342	-0.486434	-0.0520314	-0.296383	-0.388824	-0.386731
1	28332168	28467987	dJ669K10	0.44507	0.86655	2.11747	1.06586	-0.371136	0.66835	0.872095	1.01984
1	29113686	29234070	dJ437I16	-0.145182	0.0202885	-1.02238	0.0970628	0.31751	-1.08158	-0.216027	0.0401345
1	29966334	30055592	dJ893G23	-0.294707	-0.206535	-0.215327	-0.141781	0.0317891	-0.432365	-0.235297	-0.0355734
1	31639814	31764226	bA84A19	NaN	0.0159817	0.293333	-0.407281	-0.034577	-0.409472	-0.294856	0.0105492
1	31929070	32003016	bA277A4	-0.406515	-0.26484	0.159373	-0.210153	0.0899388	-0.503779	-0.436622	0.277281
1	32528048	32700923	bA114B7	-0.839707	0.0340991	4.53657	-0.908201	-0.346993	1.23776	-0.438297	0.24666
1	33806133	33908025	dJ561P1	-0.833544	NaN	-0.786266	-0.91056	-0.656465	-1.01576	-0.793301	-0.168895
1	34579434	34600086	bA327P22	-0.342922	-0.130941	0.0855155	-0.436144	0.499339	-0.54317	-0.268463	-0.0152705
1	36258282	36397220	dJ731G4	-0.568648	-0.0194688	-0.569277	-0.63573	-0.130081	-0.492258	-0.540356	0.17289
1	36820128	36953367	dJ1090M5	4.17644	-0.548581	-0.70997	-1.32164	-0.834713	-1.76688	-0.789867	0.127664
1	37571634	37705794	dJ783C10	-0.802626	-0.142383	-0.730055	-0.754521	-0.338787	-0.912288	-0.438792	0.0349979
1	37954779	38070392	dJ884C9	-0.439794	0.0651991	0.118153	-0.0796254	0.179385	-0.709996	-0.100096	0.255876
1	38998826	39062012	bA113D13	-0.282272	-0.333557	0.247119	0.0118647	-0.252513	-0.204507	-0.0139129	0.315592
1	39688681	39855176	dJ118J21	-0.472073	0.354542	0.658929	-0.0594511	-0.194512	-0.28252	0.0410984	0.0660623
1	39746593	39886116	bA204L3	0.146347	-0.00163799	3.43851	3.12043	1.61844	0.285901	1.53818	1.45938
1	40328941	40404780	bA163L4	0.701095	-0.278314	2.06475	1.02778	0.226671	0.410533	0.188572	0.0521467
1	40521523	40651472	dJ739H11	-0.214796	-0.516586	1.0175	-0.27873	-0.102141	-0.457705	-0.306448	0.195849
1	42741066	42822769	bA342M1	0.368096	0.217253	0.785447	0.622101	0.529542	0.251918	0.101112	0.365626
1	43578169	43720034	bA184I16	-0.52536	0.0166032	-1.03497	-0.531853	-0.695331	-0.262338	0.0842132	0.315602
1	44179622	44266049	bA182I23	-0.524962	-0.221551	-0.340136	-0.709871	-0.382749	0.262418	-0.415905	0.289743
1	45043093	45159060	bA420M12	-0.155081	-0.144181	-0.188527	0.0998483	-0.0117069	-0.127765	-0.309028	-0.126761
1	45181397	45281183	dJ534D1	0.228542	-0.0403687	0.757867	-0.0288124	0.346812	0.158474	0.107794	0.0832816
1	45996346	46083579	bA322N21	0.592756	0.339768	0.0831694	-0.491133	-0.356052	-0.444882	-0.0908092	0.310482
1	46498432	46655804	bA8J9	-0.00944519	-0.167407	-0.0760737	-0.0168317	-0.0157595	-1.66894	-0.26541	-0.126076
1	47588246	47788613	bA330M19	-0.38228	-0.155582	-0.408769	-0.129803	-0.120556	0.43233	-0.112632	0.0389051
1	48503255	48688954	bA428D12	0.316915	-0.260282	-0.686075	0.127591	0.100872	0.0193617	0.0979981	-0.165691
1	49928953	49996560	dJ1013G21	0.0370805	-0.188481	0.905722	-0.238501	-0.204367	-0.291885	-0.0885195	-0.334922
1	50316049	50385120	dJ86A18	-0.398615	-0.131868	0.000187625	-0.526204	-0.0866373	-0.254172	-0.102281	0.166863
1	51241935	51383604	bA253A20	0.110784	-0.0950507	1.21614	1.23976	0.517269	0.901888	0.609956	0.569793
1	52663357	52779592	dJ631H13	-0.0214182	0.144292	0.241271	0.0952486	-0.110037	0.158805	0.148909	0.127151
1	53150629	53218065	bA117D22	0.160744	-0.0525133	-0.364729	-1.19272	-0.0630135	-1.04336	-0.135652	0.144302
1	53742026	53925764	bA243A18	NaN	-0.132011	-1.00996	-0.646288	-0.127744	-0.383231	-0.125278	0.0697331
1	54479514	54608669	dJ1043G4	-0.0366396	0.0263078	-0.273892	0.21024	-0.0678736	-0.0298022	-0.13731	0.163437
1	55261080	55276102	dJ1070D5	-0.316414	0.106727	0.250655	-0.10422	0.196467	-0.34832	-0.496664	0.0982915
1	56180798	56309465	dJ710M16	-0.0714166	-0.0560919	0.53515	0.153016	0.147922	0.345162	0.139805	-0.305198
1	58325600	58376129	bA342F23	-0.356894	0.0652835	-1.20302	-0.575935	-0.463687	0.727586	-0.170473	0.0745068
1	59524453	59666832	bA37M11	0.253797	-0.263165	NaN	0.0929855	0.08325	0.422055	-0.064125	-0.221672
1	60629666	60776380	dJ668G5	0.0820312	-0.0486936	0.138882	0.119121	0.350506	0.113641	0.0187581	-0.0849899
1	61716317	61859542	dJ662P1	0.0222766	-0.132059	-0.784332	-0.133861	-0.336686	-0.163736	-0.224595	-0.103964
1	62807946	62925785	bA5P4	0.299841	0.191861	1.08019	0.838633	0.569338	0.719658	0.268734	0.345143
1	63791805	63889038	dJ537F10	-0.403418	-0.535023	0.0243112	0.334846	0.385727	0.226664	-0.0391189	-0.110997
1	64956477	65045532	dJ700A9	0.341565	-0.184466	-0.562459	-0.0529035	-0.155012	0.0180587	-0.146562	-0.213683
1	66262394	66390888	dJ759M20	-0.402003	-0.506838	1.64636	-0.103096	-0.184139	0.0187775	-0.152092	0.307396
1	66824623	66955867	dJ547N15	0.41224	0.314897	0.654881	0.648193	0.412652	0.974177	0.308905	-0.409223
1	68194964	68298102	dJ1033K19	0.044936	-0.0865014	0.434132	0.302763	0.299007	0.19831	0.0613451	-0.125418
1	68800681	68976600	bA412F21	-0.511706	-0.00478794	-0.116576	0.174341	0.0822198	0.161589	0.0742604	-0.105916
1	69487866	69601380	dJ944F13	0.122359	0.0390044	0.540307	-0.103613	-0.0417422	-0.184466	-0.139955	0.0192827
1	70364725	70421796	dJ1006B11	0.351727	-0.0620582	-0.305163	-0.125382	0.207779	0.250801	0.239093	-0.332094
1	71539699	71657649	bA175G14	-0.153872	0.184263	-0.433718	-0.10419	0.616427	0.416511	0.379183	-0.399332
1	72425259	72596075	bA261J10	0.639973	-0.333852	-0.72889	0.580311	0.72591	0.582278	0.397905	-0.0195662
1	73268168	73376470	dJ716B13	-0.0677108	0.120452	0.288486	0.00119415	-0.0627174	0.0501819	-0.00294041	-0.26893
1	74087064	74115259	bA250D8	0.576523	-0.104129	-0.0310918	0.364864	0.59256	0.623423	0.30368	-0.345516
1	75174135	75328276	bA25F16	0.383647	0.186443	0.0971409	0.119691	0.434467	0.754937	0.404694	-0.642609
1	76291141	76382352	dJ963M5	0.507719	-0.34399	0.493101	1.01202	1.02473	1.95461	0.361479	-0.543895
1	77447797	77513076	bA306I4	-0.27426	-0.313613	-0.461042	-0.390945	-0.11202	-0.162501	-0.0927258	-0.401485
1	78572270	78754197	bA143H12	0.8692	-0.0424752	0.102929	0.841157	0.885531	1.18685	0.470681	-0.280076
1	81360476	81416148	dJ653E17	0.721759	0.0655788	2.37101	1.46251	0.410634	1.222	0.432592	-0.258202
1	82022063	82121042	bA398N17	0.359671	1.24197	0.406782	0.409172	0.448157	NaN	0.0964617	-0.207699
1	83010267	83194273	bA338F23	0.590194	-0.32001	0.132833	0.182796	0.146436	0.45443	0.468768	-0.210237
1	84243806	84369370	bA118B23	-0.0386525	0.242346	-0.144559	0.882363	-0.200173	0.688773	0.0237911	0.323399
1	84480607	84623187	dJ604P14	-0.0745793	-0.267737	-0.481042	-0.326114	-0.0882451	-0.189645	-0.246765	-0.114702
1	85428109	85455669	dJ722L13	-0.0926196	2.13738	0.684392	-0.0918934	-0.264793	-0.031927	-0.180561	-0.918615
1	86438440	86566259	dJ612B15	0.251516	-0.168754	0.596319	0.30696	0.276395	0.16422	-0.116927	-0.0700072
1	86968292	87070131	dJ1043L3	-0.362265	-0.50508	-1.26095	-0.674586	-0.182408	-0.365451	-0.223196	-0.58095
1	88191148	88299418	bA427B20	0.0613664	0.0669008	0.542068	-0.0370028	-0.182111	0.105979	0.154143	-0.0441128
1	89400349	89585530	bA413E1	0.422045	0.0648631	0.408984	0.184471	0.0925461	0.087681	0.0415933	-0.00359685
1	89910859	90011066	bA298P9	-0.299913	-0.07659	0.156522	-0.075683	0.229999	0.0518905	0.181812	-0.175975
1	90631385	90739148	dJ665J23	-0.0589411	0.0167933	0.223412	-0.00190462	-0.381153	-0.368871	-0.134978	-0.059863
1	91854682	91997407	dJ621B10	1.31255	0.744224	2.34845	2.51167	0.945064	2.19769	0.907699	0.665438
1	93346278	93488295	dJ1033H22	NaN	-0.145515	0.138073	-0.343404	0.161125	-0.427284	-0.264833	0.110948
1	94215114	94311114	bA366L18	-0.599473	0.0675687	-0.139767	-0.543015	-0.468439	-1.17416	-0.155736	0.32908
1	95195972	95240174	bA14O19	0.279274	-0.0211838	-0.233603	-0.121025	-0.104557	-0.0871727	-0.157652	0.040671
1	95374699	95547746	bA146P11	0.291598	-0.0428701	0.611858	0.51185	0.136678	-0.495642	0.0414299	-0.219619
1	96381129	96568506	bA122C9	-0.0551389	0.029732	-1.28979	0.120624	0.258144	0.392383	0.112048	0.213954
1	98182503	98286919	bA17C2	0.971802	-0.131232	NaN	1.33881	1.02904	1.52167	0.609034	0.0508246
1	99228999	99354420	bA413P11	-0.668698	-0.366089	-0.890742	-0.0493987	-0.0500321	-0.514609	0.069109	-0.21595
1	99610213	99775250	bA260K3	-0.23844	0.150352	0.157266	-0.493628	-0.301747	-0.507663	-0.121757	-0.0902754
1	100593935	100725703	dJ549L20	0.475533	-0.0109775	-0.443854	0.0785282	0.451745	0.667774	0.312458	-0.445596
1	100739254	100931842	bA421L21	-0.0295234	-0.0305905	-0.0436935	-0.391042	0.15258	0.0415086	0.0466773	-0.0952232
1	101884899	102025519	bA202K23	1.00919	-0.158094	1.7675	-0.185441	0.407915	1.34197	0.340813	-0.650858
1	103275227	103393937	dJ1108M17	0.320588	0.040184	0.949821	0.370997	-0.4236	0.525414	0.215647	0.0865758
1	104823844	104937215	bA118G19	-0.161654	-0.315279	-0.90549	-0.323354	0.0114215	0.250864	0.26627	-0.0676366
1	105457904	105616920	bA90H3	0.129185	-0.256401	-0.205821	-0.204107	0.209131	0.464297	0.248672	-0.302712
1	106115383	106239985	dJ916A15	0.124653	-0.264783	-1.42897	-0.210145	0.185775	0.0109526	0.120916	-0.21858
1	106741841	106834133	dJ1077K16	0.618688	0.363395	-1.3931	-0.432635	0.262992	-0.0461238	-0.0596018	-0.464174
1	108240534	108423486	bA28P8	-0.159703	-0.213178	-0.518059	-0.153017	-0.261062	-0.161504	-0.0806189	-0.02484
1	108752509	108798365	dJ667F15	-0.594396	0.0279217	-0.318723	-0.683799	-0.133981	-0.530439	-0.449535	0.37237
1	109116674	109185677	dJ831G13	-0.692463	0.0888227	-0.346056	-0.868176	-0.131826	0.130062	-0.459005	0.373142
1	110197861	110391042	bA284N8	-0.972585	0.0505817	-1.91623	-1.14641	-0.70635	-1.46044	-0.420633	0.197965
1	111612151	111781749	bA88H9	0.232073	-0.00939621	-0.526466	-0.548698	-0.353594	0.389707	-0.121537	-0.0346074
1	112161913	112261252	dJ770C6	-0.813099	0.874865	-0.906366	-0.612648	-0.422909	-1.19678	-0.416996	0.191491
1	112605897	112674779	bA31F15	-0.899455	-0.353107	-0.377984	-0.869807	-0.399206	-0.927756	-0.383043	0.188465
1	113707554	113821651	dJ1037B23	-0.389903	0.106954	0.859071	0.007006	-0.189897	-0.263048	-0.219857	0.0127075
1	114307621	114447827	dJ1000E10	0.178892	0.0555105	-1.90898	0.181148	0.109247	0.261197	0.268996	0.191359
1	114959020	115136085	dJ663N10	-0.3893	-0.103979	-0.917371	-0.593114	-0.594212	-0.391578	-0.190148	-0.0938198
1	115926713	116053763	dJ787H6	-0.260601	-0.223325	-0.998734	-0.563558	-0.334442	-0.657724	-0.12587	-0.0824293
1	116626469	116753315	bA27K13	NaN	-0.0755918	-0.0531862	0.182943	-0.288405	0.340091	0.0506983	0.110562
1	118006418	118031368	dJ881A21	-0.0630509	-0.248265	-0.280365	-0.219164	-0.23044	0.0517379	0.0452665	-0.24923
1	118301428	118302187	bA13A12	-0.397166	-0.20688	NaN	0.159997	0.0445883	-0.290377	0.0347094	-0.198394
1	118751393	118826176	dJ610L12	-0.114591	-0.103625	-0.0978251	0.0431023	-0.0758462	0.0461974	0.0520442	-0.098894
1	118846867	119006024	bA418J17	-0.768552	0.362432	1.51691	-0.637537	-0.820473	-1.18084	-0.00284038	0.510286
1	140894206	141089793	bA417J8	-0.555584	0.230314	-0.236638	-0.715954	-0.397041	-1.13694	0.210179	0.165519
1	142633564	142790376	bA326G21	-0.268566	0.328344	0.339886	0.0924034	-0.596827	-0.477582	0.0664125	0.590227
1	143165773	143308820	bA315I20	0.186195	-0.292229	0.383973	-0.176886	0.22868	0.180336	-0.177677	0.229959
1	143505085	143591748	dJ706A17	0.142315	-0.0397246	-0.26101	-0.248368	-0.143304	-0.227056	0.0221374	0.212291
1	144386746	144499452	bA533N14	-0.402383	0.0412777	NaN	-0.075568	0.131556	-0.248153	0.0249181	0.181603
1	145219940	145272328	bA301M17	0.00244931	0.255674	-0.0115526	0.134017	-0.588106	-0.811299	0.00648521	0.540712
1	146933304	147066126	dJ790G17	-0.761755	-0.111366	-0.377712	-0.81311	-0.213226	-0.96722	-0.283078	0.176238
1	148425197	148588585	bA98D18	-0.260657	-0.352435	0.218027	-0.312625	-0.166551	-0.110722	-0.48549	0.12491
1	149557182	149673248	dJ13P20	0.1494	-0.26228	-0.690539	-0.630073	-0.319871	-0.841416	-0.341107	0.345875
1	150463354	150613519	bA216N14	0.784054	1.68391	2.95776	1.99112	1.51797	1.00805	1.49949	1.35517
1	150667156	150842982	bA422P24	0.863086	0.0878575	3.49148	1.83292	-0.684903	1.56525	1.07446	0.791614
1	151619344	151801509	bA307C12	-0.00408445	0.598527	0.473298	-0.259798	0.141993	NaN	-0.183917	0.377409
1	152050911	152054904	bA98F1	0.0109414	-0.00992424	0.084927	-0.203665	0.0845261	0.205705	0.0111398	0.643194
1	152857449	152861977	bA172I6	-0.148497	0.230812	NaN	-0.043864	0.551487	-0.210703	0.527382	1.07573
1	154571041	154754436	bA206M24	-0.183392	-0.407125	-0.716822	-0.329247	-0.127612	-0.201026	-0.099852	0.135761
1	155620978	155652793	bA393K10	-0.419145	-0.116687	-0.514652	0.0984443	0.222736	0.173699	0.0669595	-0.092275
1	156522693	156661554	bA190A12	NaN	0.0775371	-0.123945	0.0532555	-0.335887	-0.217691	-0.154268	-0.0915348
1	157885434	158056448	bA137A12	-0.336857	0.574654	0.89021	-0.138434	-0.399684	0.139543	-0.112737	0.495791
1	158190561	158301341	bA5K23	1.00195	0.279953	1.26946	0.275564	-0.134652	-0.177858	0.14895	0.632203
1	159653073	159818401	bA430G6	0.00465984	-0.393864	-0.423063	0.240684	0.11992	0.203263	-0.132684	-0.337174
1	160874812	161058835	bA541J2	0.427595	0.0106609	0.40395	0.415183	0.228119	-0.25006	-0.0703044	-0.287304
1	162238429	162314342	bA306I1	0.0462261	-0.195842	-0.0423935	-0.0264467	-0.203381	0.0207704	-0.254345	0.0263914
1	163795390	163917805	bA277B15	-0.64045	0.0559512	-0.74667	-0.792564	-0.464203	-0.829221	-0.350749	0.0123465
1	164688096	164736533	dJ702J19	0.180585	-0.326638	-0.364688	-0.68035	-0.197999	-0.64823	-0.201772	0.12379
1	166050683	166152256	dJ206D15	-0.264019	-0.0676544	-0.114666	-0.112344	-0.207497	-0.14693	-0.0290332	-0.00595522
1	166478038	166581218	dJ97P20	-0.0706594	-0.189901	-0.101006	-0.23802	-0.0167437	0.0553872	-0.213566	0.0146392
1	168443883	168599823	bA277C14	1.21852	-0.115119	1.75273	1.37855	0.559603	1.2114	0.479943	-0.241667
1	170407371	170536811	dJ1198E17	0.276069	-0.634022	1.42987	-1.05047	-0.527752	0.611798	-0.766078	-0.178049
1	171402964	171441528	dJ433G19	-0.469663	-0.183919	0.280487	-0.363373	-0.314382	-0.365505	-0.232755	0.230995
1	172061706	172200341	dJ1045J21	-0.590086	-0.106281	-0.926864	-0.758103	-0.804549	-0.757969	-0.364186	-0.31562
1	172688499	172701039	bA415M14	0.151738	0.005759	0.97572	0.375762	0.131151	0.565049	0.180504	0.23407
1	173451286	173586292	dJ423N22	-0.366538	-0.170136	-0.262543	-0.352294	-0.656676	-0.6911	-0.309272	-0.066155
1	173772919	173873336	dJ1026E2	-0.24385	-0.0798717	NaN	-0.114178	-0.530155	-0.538661	-0.211774	0.167113
1	175045416	175122416	dJ990P15	-0.0210059	0.153039	0.214759	0.172982	-0.364225	-0.182003	-0.0260785	0.540441
1	176196088	176369118	bA12M5	-0.188988	0.0850451	0.222295	0.0730891	0.204002	-0.322776	-0.214605	0.158063
1	177347289	177486294	bA46A10	0.624689	0.0633322	-0.0994293	0.927547	0.291233	1.04945	0.140055	0.231385
1	178539698	178614212	bA538D16	0.0610382	0.0847588	0.406585	0.509657	0.128692	0.752662	-0.0756264	0.224731
1	179228305	179299768	bA71D4	0.323033	NaN	0.813417	0.23158	0.197667	0.27971	0.192068	0.334095
1	179583372	179747455	bA181K3	-0.0232164	-0.0378269	NaN	0.208751	0.0288394	-0.278237	0.136387	-0.107602
1	180172682	180203021	bA293B7	-0.209714	1.41475	0.67256	-0.563293	-0.531565	-0.723951	-0.269297	0.488098
1	181088052	181130428	dJ768P8	-0.616961	0.333482	0.186998	-0.623588	-0.770137	-1.01333	-0.35397	0.288547
1	183118644	183203055	dJ973M2	-0.41813	0.0277779	-0.311498	-0.590434	0.319531	-0.339542	-0.172834	0.0408098
1	183202956	183304001	dJ936P19	-0.176808	-0.00212327	-0.466887	-0.181798	-0.169865	-0.508813	-0.0218283	-0.206127
1	183696640	183867278	bA108M21	0.869992	-0.142121	0.173422	1.49383	0.864669	1.19593	0.563787	0.063923
1	185606059	185610052	bA336D15	-0.602673	-0.00637603	1.52718	1.32697	0.787888	-0.354328	0.434735	-0.293783
1	186452134	186642296	bA445K1	0.0724941	-0.208587	0.551065	1.14398	0.702933	1.09758	0.478274	-0.213833
1	187092551	187258469	bA463J7	0.488942	0.00198084	-1.30394	0.931268	0.626328	-0.199652	0.44136	-0.23039
1	187439284	187591174	bA3B17	0.23246	-0.263752	-1.91011	0.227082	0.232517	-1.2032	0.102339	-0.471322
1	188342029	188381916	bA440G22	1.056	0.206544	1.04821	1.40839	0.703305	1.38727	0.808974	-0.377056
1	188617146	188711320	bA142L4	1.07857	NaN	NaN	0.994709	0.781794	1.3794	0.472408	-0.541343
1	189555206	189678069	bA239J11	0.121972	0.31712	0.443901	0.124728	0.142632	0.0453834	-0.0181919	0.173736
1	190531459	190624637	dJ61P15	0.273588	-0.32943	-0.574271	0.0746309	0.620662	0.535983	0.266946	-0.609497
1	191397758	191577539	bA435N12	1.12168	-0.0675953	-0.255303	1.41973	1.14993	1.34907	0.58684	0.177624
1	192720004	192817684	bA552K17	0.760611	0.112247	1.02453	0.661366	0.624204	-0.744664	0.424494	-0.16854
1	193853894	193909847	bA75C23	0.493484	0.0775737	1.20625	0.915893	0.810295	0.378983	0.634407	-0.0120273
1	194803670	194952430	bA404H1	1.07071	0.0252348	2.04444	1.60739	0.930876	0.708045	0.500866	0.157554
1	196028445	196113545	bA152M20	0.164237	0.360986	2.66198	1.41782	0.831505	1.39934	0.707552	0.380633
1	196748769	196914264	bA469A15	NaN	-0.14069	0.397558	0.0890235	0.144319	0.211186	-0.0366927	0.0716153
1	198618565	198795908	bA572A16	0.0281545	1.10784	1.03025	1.85349	1.41279	0.238942	0.466448	0.825544
1	199174414	199376267	bA480I12	0.129107	-0.567769	-1.11249	0.517473	0.441044	0.146975	0.354296	0.809422
1	200677802	200844880	bA739N20	-0.034981	-0.0123391	-0.624941	-0.563408	-0.429911	-0.446276	-0.0910874	0.0914479
1	200828581	200925960	bA563I16	0.431054	0.669035	1.01853	0.521478	0.467519	0.403177	0.430008	0.596733
1	200842881	200976864	bA430C7	-0.109609	0.259437	0.229525	-0.0956523	0.162741	-0.0364703	-0.0668694	0.360432
1	201436746	201617779	bA383G10	-0.536531	0.194929	0.194203	-0.157403	-0.115589	-0.529757	-0.0864365	0.763349
1	202985866	203130309	dJ365I19	-0.472389	0.0979585	0.955422	-0.636356	-0.438852	-0.705566	-0.00658873	0.262443
1	203283112	203390800	bA534L20	0.718137	-0.0195898	-1.44726	1.04209	0.638433	0.759991	0.283911	0.325988
1	203664733	203857297	bA564A8	0.515665	0.377505	0.951967	0.801633	0.364837	0.530525	0.400822	0.477503
1	205189401	205366147	bA59A2	-0.518363	-0.108089	0.964045	0.624854	-0.00724999	0.148925	0.279585	0.107512
1	205911133	206085049	bA385M4	1.09052	0.351743	0.324607	1.99568	0.499602	1.28682	0.883953	0.589669
1	207161851	207299528	dJ879K22	-0.124645	-0.0778302	0.160674	-0.105917	-0.086613	-0.176623	-0.168669	0.15757
1	208432092	208477235	bA354K1	0.415538	0.321407	1.14371	0.363564	0.0378601	0.125626	0.139179	0.60854
1	209854145	210030834	bA286E7	1.45895	0.130925	2.24296	0.793867	0.098309	0.678192	0.6447	0.232066
1	210028835	210151042	bA434B7	-0.440129	0.257264	1.43908	0.69576	0.166068	-0.690772	0.388525	0.398737
1	211598510	211781625	bA323K10	0.721152	NaN	-0.194399	-0.291112	0.0643299	0.426154	0.185274	-0.271061
1	212236238	212308783	bA438G15	0.550265	0.297104	0.422597	0.870895	0.508589	0.756539	0.146373	-0.295274
1	213746869	213910794	bA66M7	0.165437	-0.196659	-0.208004	-0.254946	0.0481374	0.354469	0.12853	-0.382763
1	213908795	214010336	bA241C9	0.729495	0.366178	0.693543	1.72893	0.52074	1.07025	0.408628	0.238537
1	215069528	215255311	bA224O19	0.341149	-0.0798211	0.0502661	0.380142	0.359916	0.420669	0.0884599	0.097902
1	215959319	216138366	bA392O17	0.255522	0.122509	0.0790185	0.562506	0.378519	0.747615	0.390214	-0.247477
1	216023281	216137544	bA492K2	1.11209	-0.420709	-0.387182	1.05164	0.678416	-0.129543	0.342154	0.152435
1	217178935	217346280	bA332J14	0.558654	0.00992026	1.0013	0.803272	0.402963	0.817323	0.189785	0.121065
1	218359858	218385099	bA308L13	-0.458743	-0.0426535	-0.404304	0.0363308	0.0372068	0.573298	0.159811	-0.296056
1	219851862	220033327	bA239E10	0.735208	0.314131	1.36201	1.09261	0.604872	0.968294	0.379338	0.26834
1	220324315	220505567	bA105I12	0.532139	-0.143044	0.942418	1.09145	0.419877	0.77505	0.373444	0.471797
1	221103887	221267307	bA100E13	0.418432	0.0645417	1.56618	0.958565	0.140243	0.823483	0.298074	-0.0336099
1	223450152	223513057	bA375H24	0.0919209	0.064479	0.493602	0.247253	0.616575	0.30989	0.247208	0.125891
1	224000293	224106624	bA276J4	0.00663427	0.0186386	0.797813	0.362786	-0.184818	-0.245964	0.209781	0.488474
1	225260796	225388434	dJ799G3	-0.702665	-0.227067	-0.821968	-0.931506	-0.334854	-0.856188	-0.426092	0.144748
1	225998058	226023126	dJ679K16	-0.86443	-0.197645	-0.818277	-0.453667	-0.546937	-0.854161	-0.465062	0.312815
1	227197843	227397006	bA99J16	0.56128	-0.0321054	-0.795265	-0.0651525	0.162244	0.592782	-0.0955522	0.0635859
1	229045752	229183372	bA87P4	0.153467	0.257949	0.299617	0.465938	0.227261	0.323311	0.341948	0.284919
1	229962065	230075484	bA528D17	-0.198906	-0.0450199	0.164563	1.5168	0.786049	1.81546	0.669159	-0.208219
1	232101740	232181840	bA509I1	0.41146	0.20656	0.567528	0.254956	0.251953	0.629154	0.415361	0.0300818
1	232385621	232489228	dJ940F7	-1.03491	-0.0223555	0.545135	-0.669426	-0.332647	-1.23263	-0.294402	0.404981
1	233772164	233955712	bA214M7	1.05087	0.421876	2.58088	1.22737	0.453443	1.354	0.57375	0.412589
1	234869278	234894578	bA433N10	0.774524	0.130066	1.86091	2.32061	0.822439	1.12296	1.01214	0.244463
1	235821366	236010874	bA359A17	0.408839	0.104925	0.0591801	0.745896	0.279143	NaN	0.127754	0.0699827
1	237187476	237361109	bA80B9	0.652096	0.143751	-0.784584	0.84697	0.176334	0.778902	0.569473	0.239831
1	238232307	238376273	bA553N16	-0.807829	0.465865	1.63946	0.554559	0.122739	0.514213	0.18036	0.445452
1	239475507	239630861	bA411G13	-0.0422075	-0.169411	1.91459	2.33003	0.774429	1.31506	0.640593	0.48702
1	240750935	240907231	bA13L16	-0.285253	0.77353	2.00355	0.632353	0.724418	0.418322	0.533215	0.716253
1	241386073	241556256	bA399B15	0.561394	0.321359	0.0498489	0.921603	0.814156	0.311595	1.07031	1.06248
1	243242694	243310776	bA551G24	0.561724	0.670245	3.05933	1.29242	0.528807	0.945975	0.844157	0.913619
1	243994883	244162295	bA438H8	0.287272	0.435876	1.34063	0.207211	0.340383	-0.216151	0.174244	0.309394
1	246794334	246894334	PAC160H23	-0.705741	0.290785	-0.648846	-0.785896	-0.131943	-0.926485	-0.336354	0.283607
2	330000	430000	BAC8L3	-0.0574877	0.00876789	-0.197813	-0.67257	-0.107833	-0.248915	-0.455599	-0.123712
2	596981	744912	bA125K7	-0.0195543	0.135117	0.168098	-0.524658	-0.102678	0.735394	-0.0519902	0.216501
2	2343798	2483682	bA352J11	0.169519	-0.0878459	-0.308503	-0.28357	-0.202467	0.149586	-0.187626	-0.0805543
2	2948528	3120972	bA168K7	-0.225788	-0.43021	0.4567	0.663632	0.656135	-0.0763283	-0.227035	-0.55296
2	3694213	3790776	bA327H5	-0.208519	-0.302658	-0.673898	-0.453913	-0.174924	-0.478536	-0.236663	-0.275966
2	4443265	4526760	bA292A20	-0.589569	0.260925	-1.13533	-0.924661	-0.477846	1.9588	0.205719	0.231354
2	5851710	6043643	bA350H23	-0.106419	-0.155418	-0.598521	-0.233444	-0.284468	-0.403474	-0.277583	0.115764
2	6735732	6827958	bA485O17	-0.355597	-0.0487138	-0.584967	-0.784376	-0.510695	-0.430345	0.0125019	-0.427454
2	7797026	7917517	bA16D24	-0.525803	-0.129096	-1.05105	-0.39856	-0.235514	-0.455523	0.0961882	0.0738752
2	8119436	8305622	bA542B5	-0.120988	0.120104	0.331281	0.0912679	-0.0744954	-0.136268	-0.0353376	0.480395
2	8693401	8870833	bA434B12	0.387547	-0.227241	-1.93295	-0.91336	-0.21367	0.50196	-0.0794033	-0.436033
2	9675740	9774574	bA214N9	-0.61938	0.0034783	-0.955168	-0.66134	-0.259805	-0.643079	-0.0390294	0.476243
2	10277410	10480659	bA83M8	-0.0387364	0.13915	0.737497	-0.0644523	-0.151872	-0.0647205	-0.412717	-0.0581307
2	11238327	11297960	bA345J13	-0.135814	-0.218334	0.127891	0.0186745	-0.0615468	-0.212892	-0.325311	0.151078
2	12787954	12991671	bA333O1	-0.0611407	0.285988	-0.193371	-0.329828	-0.156041	-0.0304796	-0.073018	-0.0300437
2	13588488	13724309	bA132H1	0.4368	-0.0726547	-0.441709	0.080258	0.231262	0.519543	-0.00351842	-0.313788
2	14936293	14940003	bA136K18	0.250168	NaN	0.623595	0.425653	0.100687	-0.812601	-0.0197837	-0.119531
2	15207104	15296374	bA247H16	-0.102701	-0.0312979	-0.606736	0.0252774	-0.232032	0.389112	-0.129125	-0.0967972
2	16350157	16540050	bA549D18	-0.519178	-0.0345575	-1.85721	-1.58293	-0.959711	0.444595	-0.237983	0.0161618
2	17225509	17236726	bA262D22	0.791489	0.158805	1.32947	1.26526	0.590064	1.08821	0.158604	-0.205672
2	18594292	18770980	bA111J6	0.0752491	0.0369337	0.397729	-0.146243	0.0623755	0.199744	-0.100568	-0.402121
2	19464717	19615947	bA458J18	0.348415	0.121227	0.620775	0.433444	-0.0189904	0.183473	0.0950928	-0.0556893
2	20158177	20285652	bA17L8	-0.547364	0.388915	-0.110214	-0.0654369	0.0335353	-0.320101	0.0882454	0.480374
2	21431671	21475866	bA23F10	0.674003	0.0698407	0.58227	0.708837	0.535825	0.914076	0.0135099	-0.0591947
2	22515851	22723822	bA368O18	0.0955136	-0.0226543	-0.514265	-1.02952	-0.363582	-1.10718	-0.193595	0.577053
2	23102774	23287224	bA560C7	-0.703207	-0.312961	-1.17303	-1.03967	-0.556666	-0.885628	-0.281654	-0.209337
2	23827808	23986202	bA557N21	0.308028	0.0347027	0.603898	0.183265	0.397957	-0.0150455	0.0249345	0.287824
2	24809183	24979887	bA169L20	NaN	-0.114654	-0.37639	0.310834	0.4723	-0.781798	-0.138019	-0.00854791
2	25801173	25975065	bA404P12	-0.957999	-0.673152	-1.1949	-0.790287	-0.587844	-0.507725	-0.381501	-0.16733
2	26925407	27094397	bA106G13	-0.00774609	0.482612	-0.659969	-0.690739	-0.525938	-1.07089	-0.306666	0.264743
2	27530765	27726644	bA413M20	0.154404	0.0575663	-1.36341	-0.425895	0.00219701	-0.0512431	-0.318838	0.269186
2	28518663	28676327	bA373D23	-0.405635	-0.0446214	0.0502246	-0.499515	-0.122441	-0.532746	-0.436815	-0.343253
2	29365318	29557966	bA328L16	-0.561349	0.0108575	-1.04158	-0.572584	-0.398391	-0.904426	-0.458068	0.11093
2	30782257	30889476	bA23B13	-0.603432	-0.167181	-0.718156	-1.06124	-0.397305	-1.21785	-0.043934	0.295883
2	31561132	31563663	bA540E17	-0.631799	0.107167	0.97548	0.547525	0.424837	-0.627843	0.137605	0.0169713
2	32609976	32752133	bA559D11	0.158211	-0.092024	-0.389883	0.767812	0.510098	0.413231	0.161026	-0.0107607
2	33160657	33235524	bA258F20	-0.46533	0.174536	0.216107	-0.0880447	0.342674	0.338786	-0.173683	0.222072
2	34315282	34507622	bA257N21	0.319258	-0.158689	-0.407769	0.0801434	0.125623	0.320106	0.0500558	-0.0982813
2	35125371	35217419	bA153O16	0.230463	0.31495	0.409878	0.263518	0.321066	0.309723	0.083604	-0.0945611
2	37009210	37089756	bA288C18	0.26417	0.739313	0.154999	0.976605	0.503351	0.328597	0.386363	0.620242
2	37754376	37942734	bA278G12	0.142687	-0.016229	-0.352153	-1.16559	0.332475	0.525929	-1.35792	-0.287338
2	39111474	39291918	bA173C1	0.0252816	0.279662	-0.286289	0.00670538	-0.175523	0.235412	0.192144	0.0439672
2	39643476	39795630	bA395B14	0.156517	-0.115819	0.128948	0.0887748	0.0636143	0.121125	-0.111478	-0.0845696
2	40450905	40630247	bA457F14	-0.639707	0.011268	-0.796199	-0.523121	-0.199299	-0.178579	0.328459	-0.461095
2	41721889	41902114	bA478M12	-0.886458	-0.569201	-1.80102	-1.89212	-0.447057	-0.356212	0.0566322	-0.308621
2	42438000	42622949	bA299C5	1.28025	0.364843	0.918784	0.0560556	0.0750852	-0.291739	0.102473	0.429182
2	43622451	43802796	bA204D19	-0.615355	0.176827	1.30976	1.02101	0.379771	-0.992267	0.135164	0.137662
2	44377908	44546720	bA24I5	0.282266	0.346097	0.0299963	0.151664	0.224825	-0.0818448	0.340746	0.817726
2	45357978	45536888	bA421J10	-0.372068	-0.158446	0.679569	-0.380545	-0.248093	-0.642534	-0.249931	0.338008
2	46209276	46401228	bA110G2	-0.458176	0.0158128	-0.925342	-0.724767	-0.775388	-0.33588	-0.431224	-0.119599
2	47581705	47798996	bA436K12	-0.170962	-0.0536362	-0.242036	-0.187825	-0.0999009	-0.1326	0.0148837	0.249909
2	47877940	48001954	dJ960D23	1.36205	0.168749	0.218537	0.0474507	0.0143105	0.051012	0.0951441	-0.110103
2	49042754	49197342	bA19A8	0.481106	0.00218307	0.896628	0.474488	0.106995	0.0070488	0.188759	-0.0415595
2	49406768	49618072	bA460M2	0.142795	-0.0733838	-0.295265	-0.365204	0.0034567	0.0525204	0.131409	-0.309211
2	50457090	50618861	bA5M9	0.440777	0.080107	1.06804	1.08273	0.799024	1.18341	0.104641	-0.398428
2	50491087	50652461	bA319N5	0.0124575	-0.181706	-0.679922	0.053438	0.36178	0.436218	0.104418	-0.196395
2	51053907	51243874	bA391D19	0.374705	0.0294438	-0.149602	0.236769	0.615406	0.590319	0.429865	-0.348603
2	52149898	52338029	bA389K20	0.518391	-0.182065	0.0997438	0.342468	0.55396	0.614582	0.0256387	-0.339756
2	53008163	53205490	bA7H13	0.478056	-0.121012	0.497718	0.420184	0.236183	0.594459	0.396447	-0.291001
2	53897962	54011150	bA508L23	-0.609076	0.433054	0.839932	0.00329399	-0.382677	-0.919308	-0.0660047	0.752685
2	54913367	55023209	bA30C22	-0.177623	0.0298623	0.563892	-0.00399258	-0.504279	-0.0179521	0.102576	0.198174
2	55896294	55900633	bA152O18	0.157406	-0.3415	-0.2227	0.43339	0.369525	0.418212	0.176237	0.145402
2	56306255	56448090	bA481J13	-0.815886	-0.188711	0.816702	0.0982584	-0.0540352	0.235544	0.079253	-0.293439
2	57242240	57399056	bA201J10	0.608519	0.0478831	0.315881	0.181096	0.551586	0.495884	0.21353	-0.684881
2	58197781	58322040	bA422B1	0.319431	0.00398474	-0.0743902	-0.345292	0.497842	0.314344	0.214647	0.261678
2	59063534	59245552	bA260K8	-0.0526282	-0.104819	0.611027	-0.235856	-0.114508	-0.272314	0.0927352	0.143197
2	60657299	60794307	bA440P5	0.68638	0.0530928	0.0587999	-0.470547	0.0355988	-0.0927016	0.106848	0.137742
2	61031390	61240449	bA373L24	-0.511529	-0.313397	-0.492639	-0.682318	-0.694743	-1.06614	-0.925293	-0.213777
2	61390789	61484872	bA479F13	-0.535851	-0.161503	-1.51492	-1.05883	-0.582952	-0.931261	-0.284428	-0.150773
2	62727397	62842488	bA52F10	0.225529	-0.125532	0.333091	0.215598	0.300128	0.317311	0.257658	-0.181425
2	63343673	63445777	bA261A24	0.206151	-0.216458	0.372326	0.430338	0.254643	0.232302	0.149513	-0.028746
2	64582475	64780561	bA568N6	-0.418573	-0.114965	-0.0176527	-0.558752	-0.149042	-0.595663	-0.354226	0.345461
2	65768485	65843376	bA263L17	-0.333482	0.195764	0.215383	-0.00713236	-0.083659	0.655958	-0.0091284	0.650857
2	66498313	66680774	bA554F14	-0.223183	-0.0865597	0.558165	0.183542	-0.144134	0.00366073	0.103876	-0.0596734
2	67082075	67258395	bA547F18	0.306132	-0.338711	NaN	0.432341	0.0876406	0.430688	0.206693	-0.200601
2	68111443	68267330	bA67K11	0.494268	0.142139	0.15504	0.97307	0.0734236	0.447731	0.648738	0.222001
2	68964455	69128448	bA304A15	0.178984	0.175747	-0.0950539	0.0585136	0.0424637	0.0935017	0.0534234	0.242289
2	70478727	70618559	bA245N4	-0.390097	0.121602	0.0837251	-0.781165	-0.348907	-0.789238	-0.103536	0.101033
2	70935636	70936133	bK11K1	-0.697036	-0.227219	-0.740054	-0.982459	-0.454831	-0.842767	0.266674	0.235955
2	71218139	71389385	bA467P9	0.699602	0.190308	0.676017	-0.128386	-0.0231827	-0.5273	-0.157083	0.658107
2	72351544	72532758	bA343N14	0.215619	-0.018359	-0.0265644	0.103954	-0.0309213	0.174975	0.0844797	-0.125651
2	73774704	73987776	bA434P11	-0.230425	0.052457	0.192062	0.325714	0.138639	-0.28331	0.0889346	0.493445
2	74439627	74528978	bA1P9	-0.220505	0.155173	0.722503	-0.262478	-0.156327	-0.441173	0.146118	0.734745
2	75049405	75179532	bA538P16	-0.745634	-0.0155592	-0.97094	-0.69015	-0.407516	0.0511613	-0.0950769	0.25857
2	76277254	76462427	bA335E8	0.0716256	-0.493305	-0.190439	0.169245	0.387092	0.0798541	0.297327	-0.37997
2	77235745	77300000	bA535E19	-0.0060534	-0.228867	-0.844954	-0.560402	0.182975	-0.52136	0.373275	-0.172577
2	78057260	78086096	bA9O10	1.06939	0.191279	0.446137	1.78548	0.610103	1.70502	0.757128	-0.18023
2	78843846	79033311	bA419E14	0.176415	-0.231743	0.149399	0.240173	0.277557	0.318683	0.15063	0.00560877
2	79923975	80026594	bA458O14	0.565452	-0.502237	-2.11591	-1.51964	-0.40795	-0.798522	-0.139928	-0.962835
2	80761837	80913078	bA303I4	0.304817	-0.486462	-0.593952	-0.0825907	0.459219	0.572984	0.325494	-0.48726
2	81723171	81869729	bA89C12	0.758892	-0.333537	0.17133	0.821754	0.519339	0.917911	0.189827	-0.241369
2	82715879	82820665	bA495B16	-1.25353	-1.3375	-2.86662	-2.20297	-0.980965	1.00164	-0.33323	-0.482164
2	83551985	83738671	bA548D17	0.633373	-0.0393409	0.737095	0.599785	0.196428	0.590578	0.228327	0.0779743
2	84441205	84631728	bA436L21	0.245136	-0.0940457	-0.509749	0.0313267	0.390325	0.588248	0.250039	-0.299811
2	85617876	85793569	bA513O19	-0.0399712	-0.0863943	-0.631077	-0.930561	-0.477874	-0.189377	-0.344987	0.425373
2	86234688	86405407	bA301O19	-0.188052	-0.243545	-0.239997	0.161987	0.277157	-0.0340479	0.16158	0.170331
2	88109843	88273126	bA21P18	-0.655085	-0.298478	-0.667372	-0.755529	-0.217002	-0.855534	-0.544231	-0.434558
2	89665752	89876952	bA316G9	-0.417947	0.112328	-0.453843	-0.277017	-0.169952	0.0285384	0.0879781	0.124834
2	94960961	95088035	bA71B7	0.068205	0.206346	NaN	0.270709	-0.396858	-0.0106712	0.107937	0.0328534
2	95779961	95967843	bA34G16	0.17279	-0.00531568	-0.221447	0.409716	0.0781436	0.362121	0.258514	-0.10663
2	96234486	96257327	bA139J6	-0.461082	0.111336	0.718033	-0.800862	-0.220912	-0.4303	-0.716529	-0.282074
2	96635532	96702191	bA363D14	0.418091	0.0114511	0.741175	0.519101	0.598637	0.557285	0.252447	-0.0927307
2	97710653	97941078	bA542D13	-0.355026	-0.169576	-1.07161	-1.13388	-0.114879	-0.588271	0.28393	-0.0260297
2	98250091	98437388	bA547F10	-0.566692	0.0669626	0.189809	-0.599628	-0.17615	-0.819176	-0.155168	0.407388
2	99350181	99419660	bA38C17	0.339974	0.228348	-1.11044	0.300947	0.186526	0.62807	0.20721	0.158783
2	100193363	100365936	bA549H5	-1.12393	-0.656159	-2.15136	-1.73519	-1.02102	0.865834	-0.339792	0.365726
2	100363937	100513946	bA30G7	0.200293	-0.0819319	0.92737	0.269518	0.613616	0.208158	0.1596	0.278078
2	101310050	101517625	bA299H21	-0.104801	0.120762	0.123331	0.265556	0.224659	0.0063922	-0.0388673	0.283032
2	102222905	102268717	bA451C2	0.409694	0.0141467	-0.656196	-0.479109	-0.255047	NaN	-0.161556	0.276543
2	102951106	103132069	bA373G23	-0.101956	-0.128465	-0.226962	0.0379939	0.0208548	0.0720142	0.0445079	0.0989731
2	104054472	104221990	bA451G1	0.167853	NaN	-0.911462	1.19705	0.442461	1.05287	0.360889	-0.0235192
2	105150401	105287572	bA350B7	0.074588	-0.220288	-0.30117	-0.282306	-0.123105	0.0554985	-0.117751	0.0705176
2	106088358	106252237	bA526D2	-0.0909158	-0.0392773	-1.51301	-1.0493	-0.877095	-0.44244	-0.50556	0.469427
2	107085475	107275423	bA519H15	-0.290275	-0.398576	-0.696273	-0.42078	-0.223285	-0.267511	-0.301293	-0.0554736
2	108369751	108583225	bA443K8	0.396156	-0.0485232	0.918362	0.548304	0.358537	0.590552	0.169233	-0.0670677
2	109349337	109557907	bA566O4	0.187419	0.166455	-0.289733	0.233482	0.363705	0.13189	-0.31477	-0.395335
2	110445772	110539320	bA528G9	NaN	0.0485353	0.125042	-0.309705	-0.0163219	-0.168453	-0.0843051	-0.0239624
2	111682116	111863612	bA438K19	-0.528867	-0.263821	-0.969035	-0.809015	-0.60984	-0.67296	-0.2529	0.125623
2	113282001	113422678	bA368A17	-0.139222	0.114541	-0.330663	-0.492742	-0.375878	-0.363672	-0.219039	0.0132639
2	116019493	116067192	bA412A2	0.142088	-0.173281	0.00814919	0.18346	0.0815193	0.301913	-0.00430362	-0.297538
2	116571245	116707107	bA339P1	-0.0688299	0.0997472	-0.373953	-0.252786	0.124862	1.22324	0.048087	-0.0528797
2	117353106	117540904	bA59P4	0.410794	0.0272023	-0.126504	0.345595	0.270779	0.787688	0.107018	0.0264781
2	118277384	118482217	bA425F6	0.103105	-0.163638	-0.168959	0.0810407	0.1668	0.279452	0.188998	-0.106161
2	119472589	119598627	bA19E11	-0.174925	0.111733	-0.109829	0.0121349	-0.233105	0.0639015	-0.0680873	0.164757
2	119596628	119741869	bA77A13	0.459029	-0.173005	0.334429	0.954023	0.539973	1.02016	0.11764	-0.186719
2	123096194	123142566	bA490M17	-0.853661	0.213386	-0.867005	-1.23991	-0.398927	-0.587948	-0.241047	-0.243261
2	123140567	123180698	bA202H24	0.255904	-0.0560898	0.885966	0.784372	0.034251	0.383943	-0.12305	0.00505696
2	124922809	125083488	bA298E18	-0.368128	0.129899	0.272342	0.056216	-0.0551236	-0.472907	-0.0118087	0.0792596
2	125735232	125901032	bA11G20	0.305501	-0.117761	1.12334	0.906492	0.858551	1.731	0.549933	0.290665
2	127368787	127442351	bA48K7	-0.290529	-0.328758	-1.08474	-0.651349	1.38279	-0.369057	-0.529665	-0.0278642
2	127981425	128186766	bA314L11	-0.168348	0.0598583	-0.212721	-0.0153879	-0.284372	-0.664822	-0.217396	0.315181
2	129841458	129989789	bA207G14	0.228166	0.281779	0.104192	-0.163572	0.156125	-0.274613	0.102026	-0.15571
2	130606501	130771911	bA32C20	-0.0574746	0.155653	0.537909	0.030165	-0.399235	-1.02948	0.0994537	0.339613
2	131470539	131662078	bA510C1	0.442134	-0.0219058	-0.585843	-1.01182	-0.671696	-0.868501	0.0965885	0.10829
2	131803921	131976991	bA209H16	-0.147122	-0.359304	-0.399035	-0.103686	0.094445	-0.0833386	-0.0206535	-0.0326445
2	132299025	132303018	bA24O13	0.172354	-0.046309	-0.204341	0.0995578	-0.177985	0.316252	0.108086	-0.455525
2	133303448	133307441	bA1L22	0.135019	0.00537837	0.242549	0.10364	-0.151491	0.207279	-0.04566	0.0494921
2	133630358	133805991	bA105K20	0.0507071	-0.353416	-0.435786	-0.268146	0.12535	0.429393	0.109281	-0.195792
2	134960168	135143212	bA436E24	0.0747543	0.376148	-0.119743	0.433054	-0.0515434	0.0963692	0.259438	0.105186
2	135945181	136097083	bA289K3	0.786806	0.152261	1.06501	1.04118	0.837988	0.730046	0.458803	0.215722
2	137181409	137393156	bA355I13	-0.4237	-0.359451	-0.587951	-1.02089	-0.206067	-0.186446	-0.12034	-0.164879
2	137778169	137838876	bA414I8	-0.24712	-0.139845	0.948817	0.171189	-0.114406	-0.334195	-0.118232	-0.165007
2	138431026	138520237	bA58C7	0.616779	-0.149075	0.820923	0.592922	0.643306	0.733253	0.349464	-0.205466
2	139835478	140003619	bA12M21	0.511121	-0.0214768	0.154035	0.341704	0.0202947	0.714964	0.30548	-0.379714
2	140981881	141078816	bA283F6	-0.112598	-0.449156	-0.274878	0.0142064	-0.421432	-0.114838	-0.110854	-0.423306
2	141769177	141869885	bA279M2	-0.333814	-0.292722	-0.252273	0.0818437	0.247065	0.185832	0.11882	-0.528514
2	142998111	143182231	bA215D12	0.673282	-0.216453	-1.07009	0.231142	0.406538	1.20291	0.110069	-0.505354
2	143805496	143972919	bA190J23	0.132156	-0.230854	-0.665455	-0.0361318	0.0273999	0.456897	-0.0325624	-0.256471
2	144894614	145085732	bA285H23	-0.236024	-0.234871	-0.883895	-0.169361	-0.132536	0.161845	0.120622	-0.12899
2	145940125	146077056	bA30I11	0.519991	0.219625	0.104398	0.0367415	0.153396	0.472593	0.332569	-0.0257971
2	146897423	147081828	bA207O14	0.665093	0.121059	0.315967	-0.290072	0.566212	0.117393	0.254203	-0.390976
2	148045023	148206207	bA3P4	0.456901	0.0622853	-1.86416	-1.1072	-0.678536	0.6815	0.0763774	-0.478762
2	148369912	148420899	bA16J22	0.271062	-0.371986	-0.214832	0.12168	-0.0968315	0.55455	0.112587	-0.327281
2	150455875	150656782	bA329H24	0.28199	0.0820712	0.0055002	0.174844	-0.118306	0.40647	0.121227	-0.381504
2	150858927	151035419	bA62P16	0.0238503	-0.391178	1.20953	-0.176429	0.214723	0.414166	0.00361505	-0.277267
2	151120775	151295665	bA21M18	0.0461462	-0.324526	-0.548682	-0.00592838	-0.223024	0.349227	-0.14367	-0.226982
2	152081732	152242356	bA311L3	-0.176715	0.494071	0.659593	0.199173	0.0732597	0.0647297	-0.163852	0.253939
2	152684035	152869589	bA458J7	-0.822914	-0.53159	NaN	-1.06785	-0.633573	-0.586838	-0.316211	-0.0675605
2	153805937	154007503	bA547P13	0.0672254	-0.106921	0.10208	0.194213	0.215139	0.364363	0.136289	-0.290728
2	154685437	154836828	bA21L17	0.915157	0.113401	1.2607	0.677609	0.666046	0.982154	0.430195	-0.104006
2	155783329	155843632	bA266L10	NaN	0.0216296	1.49879	1.01699	1.07103	1.20154	0.681973	-0.292278
2	156775725	156835956	bA228F17	0.336153	0.269514	0.000573145	0.376171	0.194147	-0.438958	-0.0601603	-0.147373
2	157307879	157432618	bA522N18	-0.579046	0.109979	-0.551104	-0.292429	-0.568518	-0.809504	-0.265452	0.283473
2	158420513	158587613	bA301K6	0.142736	-0.240535	0.0232053	0.203068	0.261064	0.487693	0.253597	-0.136477
2	159364604	159556821	bA552E1	-0.219128	0.0030781	-0.114934	-0.11035	-0.346506	0.919185	-0.324608	-0.138794
2	160805538	160973554	bA23H14	0.574382	0.0515858	1.23138	0.549924	0.314407	0.818216	0.282852	0.127696
2	161852242	162024122	bA440P12	0.200768	0.12345	-0.83171	0.0140915	0.0344093	NaN	0.286778	-0.0370135
2	162938680	163102360	bA576I16	0.838381	-0.0694823	-0.463187	0.197562	0.0299201	0.67775	0.0955085	-0.0881253
2	164421633	164498688	bA5J4	-0.151027	0.87368	-1.9242	-1.58608	-0.805131	-0.866483	-0.0324772	-0.0317744
2	165494243	165685240	bA272E3	0.126698	0.070525	-0.160665	0.210518	0.162688	0.358991	0.161418	0.0124301
2	166027983	166093953	bA218M2	-0.33065	-0.0555873	-0.27327	0.102764	0.03777	0.647258	0.154355	-0.267734
2	166765872	166955937	bA2I8	-0.775634	-0.0715464	-0.0277177	0.326478	0.735854	0.827625	0.49031	-0.0902216
2	167701621	167899984	bA125M15	0.542702	-0.0498908	0.816608	0.568216	0.559552	0.512325	0.293173	-0.268427
2	169016867	169207143	bA11N16	-1.36937	-0.361114	-1.82823	-1.61145	-1.05832	-1.12392	-0.289734	0.0928669
2	169462534	169652882	bA285F23	0.159368	-0.198596	-1.2259	-0.229873	-0.193236	0.341119	-0.126889	-0.196871
2	169906687	170070826	bA141H20	0.2915	-0.36179	-1.39743	-0.048406	0.498535	0.0754772	0.39201	-0.290645
2	170079677	170193043	bA551O2	0.65181	-0.0975157	0.805684	0.323594	0.567526	1.46549	0.391321	-0.424671
2	170726864	170946038	bA389F18	0.271322	0.0660482	0.454819	0.443119	0.00217272	0.528353	0.0267741	-0.118045
2	171336703	171516923	bA244E6	-0.328922	0.156474	0.844585	0.267497	0.604077	-0.174889	-0.119472	0.19192
2	172390362	172527175	bA176L20	-0.0936413	-0.106675	-0.523992	-0.232958	-0.374858	-0.142536	-0.289798	-0.0593465
2	173424531	173581363	bA343H10	-0.127402	0.0771567	-0.00881125	-0.0919104	-0.14849	-0.339259	0.0169866	0.179814
2	174252837	174388588	bA158L8	0.18477	0.0345776	0.0730329	-0.0993406	-0.427663	0.544226	-0.203168	-0.326107
2	175305545	175487207	bA483E17	-0.548246	0.0534142	-0.689544	-0.455713	-0.365345	-0.996514	-0.013542	0.228194
2	176234174	176401148	bA205B19	-0.342237	0.0167683	0.262783	0.456238	0.128791	-0.269813	0.100713	-0.198882
2	177169341	177322759	bA157E8	0.224634	-0.0854995	0.654721	0.236579	-0.223839	0.722548	-0.115842	0.00325776
2	178335657	178508071	bA250N10	0.42426	0.0944116	-0.818221	0.214585	-0.0221844	0.626948	0.0515331	0.0187341
2	179222162	179394989	bA65L3	-0.0855013	-0.0780294	-0.464363	-0.0615069	-0.210742	0.356045	0.238329	-0.110359
2	180201131	180373747	bA535B12	-0.461417	-0.229432	-0.85897	-0.670724	-0.188428	0.0379664	-0.221451	-0.173863
2	180587174	180739424	bA391P1	-0.150506	-0.0539245	-0.848135	-0.0501816	-0.132293	0.652447	0.0125057	-0.24124
2	182072867	182243647	bA504G5	-0.642764	-0.176457	-0.793186	-0.540284	-0.479068	-0.78051	-0.225203	-0.151605
2	182944119	183094332	bA67G7	0.190772	-0.161192	0.125048	0.476963	0.462547	0.657046	0.377397	-0.245983
2	183401723	183567652	bA38H6	0.454358	-0.0739309	0.946775	0.597551	0.380059	0.722254	0.247457	0.315342
2	184685467	184725016	bA571N13	-0.134566	-0.00606514	-0.116745	-0.160353	-0.0386518	-0.366099	-0.00686434	-0.0986518
2	185395839	185590346	bA363K21	0.154615	-0.329339	-0.887977	-0.711111	0.301508	0.298218	0.159656	-0.334568
2	186578471	186682133	bA400O18	0.47082	-0.470126	0.456678	0.704256	0.749108	0.576262	0.359406	-0.596711
2	187666171	187875094	bA372A6	-0.350308	-0.0966169	-0.249057	-0.360201	-0.219232	-0.234527	-0.0835444	0.0022454
2	188453010	188614964	bA123G24	0.540179	-0.251456	0.487984	0.463057	0.147694	0.839815	0.0656863	-0.0331258
2	190536338	190620452	bA455J20	0.236998	0.123733	1.0125	0.923737	0.536878	0.579601	0.193335	-0.00611482
2	190620449	190724588	bA1021H16	-0.934745	-0.335813	-2.1587	-1.00609	-0.250603	-1.17282	-0.158509	-0.408066
2	190724585	190831914	bA235L22	-0.0838967	-0.15168	-0.367654	-0.0278649	-0.100835	0.13929	-0.0522882	-0.0773614
2	191417738	191610752	bA284E5	0.165788	-0.203134	0.627006	0.292363	0.0851087	0.461685	0.172962	0.120791
2	193170697	193332536	bA59L22	0.647675	0.282638	-0.595943	0.40142	0.903057	1.77645	0.535576	-0.47698
2	194026091	194194031	bA363G3	0.278837	-0.231956	-1.5568	0.35493	0.416037	0.603012	0.274082	-0.128034
2	195485584	195667532	bA1A1	0.609722	0.185	-1.15309	-0.921564	-0.274571	-0.232508	0.00906036	0.0200608
2	196082691	196251976	bA149P12	-0.255737	-0.0170092	0.538209	0.499118	0.34827	0.428703	0.161973	0.0712361
2	196889112	197009289	bA347P5	0.132237	0.291165	-0.606443	-0.158091	-0.1139	0.524461	-0.103287	-0.0837419
2	198038758	198095131	bA172B9	-0.101731	0.26542	1.63428	0.0283855	-0.261201	-0.0168408	-0.0504742	0.267579
2	198509628	198554133	bA115H23	-0.760501	-0.141251	0.0220814	0.348788	0.417122	-1.7495	0.109394	-0.336985
2	199071858	199269768	bA439M9	-0.0141382	-0.291625	-0.532453	-0.0809296	-0.23233	0.451159	0.089516	-0.129447
2	200129307	200326370	bA23F11	0.122727	0.111739	0.872197	0.279064	0.142912	0.648078	0.0997757	0.207645
2	200245540	200377602	bA530J6	-0.641384	-0.25505	-1.22289	-0.319039	-0.681737	-0.696041	-0.131199	0.126862
2	200849013	200935970	dJ417E16	-0.315913	0.477729	-0.294074	-0.580482	0.189127	2.0543	-0.0817175	0.56695
2	200964162	201140700	bA34K3	0.1434	-0.187183	-0.0684696	-0.00277784	-0.517471	-0.0149543	-0.0471889	0.0775277
2	201843032	201938104	bA13J8	0.123537	0.43166	0.10053	-0.0223417	-0.0755064	-0.393557	-0.207278	0.46669
2	202456057	202594326	bA309N8	-0.326602	0.0286177	0.0166248	-0.12848	-0.0145547	-0.221264	-0.00641396	0.228355
2	203621385	203638131	bA329O10	-0.25932	-0.525622	-0.231426	-0.453238	-0.463083	0.00670899	-0.12904	-0.226838
2	204971009	205170962	bA507C18	-0.92646	-0.383609	-1.82953	-1.13454	-0.823251	-0.996656	-0.283204	0.0784205
2	205430598	205603073	bA15J24	0.604842	-0.0461465	-1.30798	-0.666755	-0.581131	1.62041	0.0370389	-0.0824241
2	206310136	206498197	bA325M10	-0.0607523	-0.0202422	0.138539	-0.354975	-0.486183	-0.280523	-0.0801948	0.0403644
2	207102736	207252197	bA470J24	-0.402792	NaN	-0.148265	-0.0957998	-0.28727	-0.141281	-0.131981	0.142042
2	208970815	209134303	bA140C4	0.209828	0.0397036	0.26942	-0.357783	-0.213717	-0.476446	-0.145864	0.478909
2	210207450	210405989	bA479L11	-0.0264133	0.124712	-0.220734	-0.0933449	-0.00534273	0.129771	0.108299	-0.03189
2	210883687	211075790	bA396J8	-0.327172	-0.105476	-0.037777	-0.175933	-0.396972	-0.0359542	-0.0157753	0.189368
2	212146079	212293415	bA300D24	-0.140656	0.0768685	-1.16515	-0.000170949	-0.211675	0.64118	0.0523654	-0.246717
2	213416750	213602967	bA560C24	0.161346	NaN	NaN	0.471905	0.068387	0.209521	0.160098	-0.0808402
2	213968930	214129960	bA105N14	-0.16105	0.401132	-0.717397	0.022148	0.480311	1.3844	0.291237	-0.27281
2	215005992	215163249	bA427F22	0.355711	-0.00971163	0.544383	0.579782	0.420421	0.513483	0.239874	0.0664104
2	216526606	216658332	bA489P15	0.059341	0.425362	0.629485	0.20185	-0.334967	0.238033	0.111118	0.100873
2	217317794	217480001	bA307A11	-0.423213	-0.162175	-0.180295	-0.491856	-0.355774	-0.351799	-0.359364	-0.303237
2	217479802	217659660	bA506C8	-0.365555	0.315059	2.82048	1.32862	0.649215	0.928118	0.513904	0.803936
2	218053404	218265952	bA423F9	0.0473545	NaN	0.640034	0.402783	-0.219815	0.297977	0.00299458	-0.183144
2	219082870	219274623	bA378A13	-0.798607	0.172006	-0.616598	-0.781347	-0.631166	-0.805468	-0.63204	0.332245
2	219614173	219718536	bA504G11	-0.831966	-0.261695	-0.611466	-0.353573	-0.622058	-1.13719	-0.180466	-0.138684
2	220492686	220687643	bA512O7	0.50248	-0.237616	-1.07254	-0.617519	-0.343283	-0.516172	-0.291313	0.128736
2	221590943	221677839	bA444B5	0.136794	-0.236011	-1.32755	-0.900407	-0.446739	-0.352081	-0.107273	0.0501971
2	222749065	222930034	bA71J24	0.13328	-0.0816776	0.328996	0.280172	0.212168	0.277426	0.125657	-0.0742085
2	223445051	223551576	bA3I22	0.408654	0.256076	-0.424561	0.929799	0.458014	0.658694	0.642895	0.671167
2	224273832	224403384	bA551D18	0.373312	0.0556337	0.630763	0.587686	0.0426948	0.865387	-0.0790319	-0.129751
2	225811930	225995608	bA516C4	1.04121	-0.0947554	-0.254194	1.19256	0.0912854	1.47228	0.196987	0.222797
2	227295563	227461062	bA211K17	0.546768	-0.0597304	-0.355144	-0.142445	0.170306	0.763302	0.0507953	-0.398402
2	228622470	228797814	bA149O3	0.192563	-0.0506932	NaN	0.338124	0.129917	0.235858	-0.0475543	0.0653655
2	229572357	229692735	bA70L16	0.60387	0.288396	-0.207245	0.374364	0.23352	0.895536	0.167766	-0.566148
2	230642731	230845113	bA457P23	-0.349388	0.147462	-0.594575	0.152867	-0.0691662	-0.0752209	0.11549	0.321514
2	232043674	232222203	bA419H23	-0.561788	0.012449	-0.863114	-0.720459	-0.365156	-0.721242	-0.00507967	0.447703
2	233104539	233261148	bA91N19	0.205188	0.00257235	0.417998	0.407229	0.518399	0.200873	0.108608	-0.249135
2	234345150	234452760	bA534J17	0.169811	0.10547	-1.18152	-0.764425	-0.618	-0.812008	-0.256126	0.248339
2	234944594	235053304	bA263G22	-0.510872	0.0822278	0.630926	-0.237519	-0.0887976	0.0165049	-0.33652	0.238148
2	235615345	235769232	bA21I1	0.54723	0.0831043	1.17254	0.698724	0.57595	0.476813	0.472895	0.415467
2	236338649	236529033	bA84G18	-0.177524	0.156347	0.609912	-0.555538	-0.0903475	-0.135112	0.017056	0.3568
2	237391609	237572391	bA260J21	-0.507224	-0.0312169	-0.394275	-0.477986	-0.298509	-0.876151	-0.238782	0.319686
2	238603201	238815475	bA497D24	-0.598539	0.349786	-0.328668	-0.251488	-0.0520157	-0.492829	0.00618614	0.347785
2	239282041	239431104	bA15L18	-0.126721	-0.0779574	-0.101807	0.0379439	0.0578221	0.0385737	-0.0830533	0.283606
2	240248586	240393205	bA546M8	-0.513953	0.478857	1.86744	-0.473842	-0.529574	-0.426075	-0.300072	0.208918
2	240441600	240541600	BAC172I13	-0.0201656	0.601935	0.454018	0.0210855	0.457883	0.198535	0.771789	-0.717868
2	240931086	241102504	bA463B12	0.281205	0.17536	-2.6728	-1.72538	-0.875289	0.661416	-0.40344	-0.249295
2	241991259	242166437	bA556H17	-0.597862	0.0302608	0.296193	0.771463	0.616369	0.675221	0.338894	0.3866
3	450000	550000	PAC1186B18	0.520741	0.0163522	0.237978	0.580658	0.155912	0.700333	0.0143041	-0.253885
3	785183	975121	bA86C13	0.200447	-0.548173	0.516573	-0.00237156	0.0346997	0.134468	-0.0551147	0.00532755
3	2198117	2384123	bA299N3	0.239929	0.208784	NaN	0.962987	0.309114	0.119621	-0.280285	-0.259281
3	3117064	3291376	bA97C16	0.71704	0.194777	NaN	1.13124	0.868663	-0.76288	0.318047	-0.298096
3	3134172	3304965	bA95E11	0.0939153	0.0376808	0.0465741	0.205624	-0.245842	0.146703	-0.377996	-0.123812
3	3185365	3343428	bA10H6	0.220426	0.0259505	-0.788891	0.00587303	0.0943698	0.155144	-0.354522	-0.48099
3	4345069	4443828	bA183N22	0.133552	0.0544082	0.227505	0.225967	0.0404769	-1.03138	-0.241108	-0.0206118
3	4507297	4669809	bA238A9	-0.0994211	0.102038	-0.553086	-0.0163524	-0.325304	-0.48827	-0.715404	0.087538
3	5044648	5197799	bA129J10	0.341451	0.223398	0.0315444	0.0778273	0.0635635	0.536237	-0.294093	0.00735362
3	6492091	6653579	bA277D17	0.0634131	-0.152292	-0.0660533	-0.048478	0.0484299	-0.0331794	-0.233461	-0.176731
3	7498176	7537606	bK114A6	0.0299721	-0.146611	-1.1722	-0.174595	0.112973	NaN	-0.124867	-0.37814
3	7577251	7777229	bA329A2	0.00684507	-0.2304	-0.714492	-0.187536	-0.156783	0.257851	-0.785725	-0.291834
3	8869825	9037105	bA105K13	-0.127043	-0.254781	-0.550672	-0.0181844	-0.23487	-0.0252939	-1.96544	-0.720191
3	9070789	9253049	bA334L22	0.676959	-0.552156	-0.258854	-0.149969	-0.00872095	0.914961	-0.42159	0.182684
3	9836593	10004196	bA439F4	-0.0818157	NaN	0.348159	0.313362	-0.293725	0.042555	0.162178	0.140093
3	10085005	10261536	bA382A21	-0.6007	0.569063	0.218165	-0.31635	0.105077	-0.58977	1.45288	0.842237
3	10154329	10364381	bA438J1	-0.212583	-0.135914	0.218698	-0.230537	0.224774	-0.433054	-0.630589	-0.176119
3	10613350	10788431	bA94A14	-0.55691	-0.0138841	-0.454805	-0.648907	-0.645202	-0.824509	-0.982261	0.0583556
3	11579557	11687076	bA167K17	0.286453	-0.190087	NaN	0.783172	0.174191	0.427361	-0.311284	-0.2144
3	12463729	12536460	bA25C10	-0.709352	0.20197	-0.135142	-0.75541	-0.15704	0.449055	-0.285987	0.615253
3	13524433	13673088	bA488M6	-1.04472	0.161075	-0.370773	-0.577014	-0.115562	-0.731383	-0.250657	0.373149
3	13814569	13981548	bA165B2	0.391207	NaN	NaN	0.19509	0.22111	0.217315	0.0852165	-0.005657
3	14903123	15063824	bA316A10	-0.442043	-0.154945	-0.317097	-0.587286	-0.305616	-0.70567	-0.491331	-1.43165
3	15797208	15957492	bA255O19	-0.721449	0.108426	-0.911334	0.816586	0.303591	0.666023	0.233551	0.0582282
3	17181366	17345270	bA80D24	0.251962	-0.160998	0.452642	0.559148	0.195635	0.775392	0.235789	-0.274712
3	17708569	17860072	bA8D23	0.978062	0.705639	-0.378012	0.893831	0.255507	1.22453	0.619086	0.62473
3	19251433	19337412	bA44M22	0.281732	-0.0871824	1.13816	0.0320771	0.230634	0.783416	0.170872	-0.226618
3	20511062	20703380	bA27J5	0.180728	0.00669342	-0.257411	0.0168897	0.159885	-0.334428	0.0649103	-0.153007
3	21189154	21358862	bA180N14	0.305944	-0.189201	-1.08974	0.0146493	0.02409	0.395434	-0.0962079	-0.0395051
3	21449056	21617033	bA16E8	-0.15667	-0.115067	-0.103488	-0.348837	0.231532	-0.133028	0.83423	-0.475899
3	22247425	22389617	bA208G16	0.600542	0.309212	-0.0222903	0.500232	0.371277	-0.00307982	0.223166	-0.369498
3	23279600	23450547	bA89F18	0.117091	-0.192965	-0.609151	-0.130854	0.0698027	0.481693	-0.0748222	-0.133229
3	24080833	24183132	bA18L17	0.0115299	0.0299703	1.01223	0.693	0.351397	0.721258	0.221705	-0.08991
3	25322783	25393342	bA421F9	0.0179105	-0.106567	-0.476742	-0.114409	-0.162533	-0.179966	0.0548977	-0.0212371
3	26656189	26757576	bA226E22	0.475244	0.48336	0.964188	0.928288	0.447428	-0.710244	0.304283	-0.183507
3	27224360	27406079	bA2G22	-0.0805152	0.166414	0.104217	-0.160338	-0.267947	0.122961	0.0573369	0.392354
3	28520708	28699154	bA11L6	-0.440063	-0.492584	-1.67107	-0.845756	0.0525157	-0.381097	0.131136	-0.32268
3	28688059	28841648	bA30G4	0.249578	0.0150041	0.447867	-0.237537	-0.0421402	0.0822413	0.0678121	-0.396781
3	29742060	29893273	bA103N21	-0.521843	-0.158768	-0.0464972	0.0684708	0.53857	-0.380509	0.243923	-0.359534
3	30150307	30322389	bA69K20	0.466159	-0.372501	-0.412776	0.684216	0.0835736	0.0219741	0.151216	-0.227196
3	30547009	30608052	bA99M10	0.465898	NaN	-0.460955	0.323535	0.0202077	0.195454	-0.0199681	0.257106
3	30704315	30705070	bA7I16	0.0661328	-0.214664	-0.79508	-0.399401	-0.484905	-0.242475	-0.261624	-0.0725301
3	31506420	31683672	bA48E16	-0.314716	-0.039575	0.582767	-0.444324	-0.127496	-0.351624	-0.409238	-0.00111184
3	32325331	32522440	bA524O15	-0.22997	0.227918	0.345732	-0.0154084	-0.0258175	0.156519	0.0873583	0.566514
3	34367102	34527408	bA35C18	-0.120701	0.263049	-0.425201	-0.323865	-0.0113531	-0.171715	0.0315202	-1.05386
3	34852796	35002736	bA56P22	-0.0325883	0.0359855	0.964812	0.538752	0.284828	0.156434	0.177546	-0.187193
3	35450600	35626591	bA380G10	0.704616	-0.0912492	-0.3764	-0.0514098	0.753978	-0.946875	0.264313	-0.125727
3	36400609	36570336	bA134C18	0.414119	0.0302126	0.735441	0.720067	0.17041	0.46076	-0.0189728	-0.386364
3	36872417	36974787	bA491D6	-0.858447	-0.37528	-1.99524	-0.596303	-0.414822	-1.08086	-0.302429	0.402446
3	38973295	39149868	bA331G2	-0.634111	-0.365189	-1.76084	-0.639409	-0.446144	-0.397554	-0.153797	0.196537
3	39505261	39674678	bA66G8	0.464392	0.155748	1.36095	0.922805	0.690635	0.394471	0.553025	0.308487
3	40986718	41155564	bA424L2	-1.04091	-0.192786	-2.58102	-1.55289	-0.657118	-1.17039	-0.396521	-0.149569
3	41010293	41192931	bA527M19	1.3677	0.34141	0.777409	0.436886	-0.0175705	0.0140119	0.00452372	0.0986384
3	42444041	42629201	dJ613B23	-0.719328	-0.108967	-1.1134	-0.509211	-0.63849	-0.917543	-0.167165	0.238869
3	43358257	43477932	bA258N2	0.33195	0.0587265	0.143604	0.528823	-0.0284106	-0.117159	0.147175	-0.149944
3	44567485	44737886	bA189H19	0.0140657	-0.037644	1.10004	0.572309	0.420116	0.595595	0.0891113	0.0345515
3	45159638	45342206	bA111P21	-0.167943	0.199869	0.457333	-0.154521	-0.116786	-0.415299	-0.257433	0.132544
3	45880695	45937629	bA91E8	-0.306433	0.264046	-0.598116	0.0307246	-0.0473252	-0.6208	0.0562502	-0.176817
3	47139758	47228975	dJ544D10	-0.257298	-0.309405	0.0432809	-0.106898	0.0190248	-0.261366	0.0921025	0.0320859
3	47702308	47883360	bA88B8	-0.122239	-0.242578	-0.182267	0.277452	-0.0576131	-0.228426	0.721746	0.7229
3	48080483	48208886	dJ289H18	-0.309284	0.430959	0.793999	0.053724	0.0527492	-0.0817729	-0.0247247	0.787052
3	48201263	48356732	bA24C3	0.352646	0.569739	-1.24619	-0.293737	0.582517	-0.346967	0.036651	0.480337
3	49101963	49272749	bA3B7	-1.06441	0.228852	0.47382	-1.35637	-1.06009	0.371359	-0.42913	-0.27682
3	49765081	49871304	bA78O10	-0.761624	0.181915	0.727918	-0.950974	-0.506043	-1.05936	-0.455884	-0.0829739
3	51272113	51440611	bA89F17	-0.101445	0.0830365	0.286334	-0.0801399	-0.0586727	-0.143326	-0.185087	0.179841
3	51673469	51888155	bA314A5	0.112085	-0.331539	0.190449	0.541468	-0.322292	-0.550642	0.193605	0.384499
3	51814981	51855132	dJ1087L12	0.368325	0.663903	0.956821	-0.0023193	0.490714	0.165948	0.866558	0.757365
3	52436107	52622840	bA447A21	-0.0463134	-0.189521	-0.172001	-0.386468	-0.23153	0.193798	0.278867	0.132266
3	52586152	52719626	dJ966M1	-0.0137571	0.234812	0.259391	-0.0153601	0.293062	-0.337023	-0.206938	0.292069
3	53887204	54068264	bA122D19	-0.490424	-0.26775	-0.575859	-0.635257	-1.009	-1.21113	-0.607623	-0.185545
3	54492225	54658751	bA554O1	0.229733	0.242155	0.127552	-0.591199	-0.260503	-0.771385	-0.403007	0.146966
3	55485886	55677395	bA58O15	-0.183002	-0.103037	-1.60503	-0.481423	-0.340778	0.0812188	0.0518105	-0.285567
3	57220103	57254824	bA120C2	0.11432	0.323566	1.36608	0.478258	0.415743	0.332227	0.0354838	0.207667
3	57250249	57414748	bA229A12	0.224278	0.040414	0.800126	0.727824	0.552007	0.583597	0.0905177	0.115771
3	58029018	58207027	bA80H18	-0.307087	0.313361	-0.524125	0.0655846	0.149028	0.58775	0.00234392	-0.112067
3	59583889	59737644	bA170K19	0.160613	0.032818	-1.38315	0.210172	-0.000507844	0.276205	-0.0299642	-0.216051
3	60636759	60806946	bA94D19	0.280924	-0.0409411	0.0412783	0.202373	0.120763	0.311327	-0.0680229	-0.288611
3	61896614	62062462	bA154D3	-0.583497	0.97865	1.25759	-0.732469	-0.505756	-0.872742	-0.21004	0.100628
3	62070479	62227061	bA204J18	0.0621568	-0.147137	-0.282781	-0.138956	-0.0649626	0.0299178	-0.241641	0.0994469
3	63254921	63396321	bA108A8	0.356413	0.111529	0.143841	0.242761	0.305606	0.449494	0.297728	-0.311087
3	64078561	64237626	bA9A1	0.138742	0.566889	-0.0748784	0.192499	-0.410968	0.194732	0.0935156	0.446671
3	65062214	65240993	bA88H12	-0.399484	-0.211658	-0.547893	-0.238563	0.166873	-0.614645	0.125783	-0.200385
3	66608283	66766842	bA24O17	0.103614	-0.0516042	0.457823	0.341257	0.529888	0.347832	0.13382	-0.0907008
3	67749709	67887396	bA79C12	0.406203	0.0380123	NaN	0.350111	-0.110406	0.64556	0.10376	-0.312371
3	68213763	68387050	bA253K11	0.402561	-0.395821	0.185404	0.0661327	0.283382	0.402181	0.134177	-0.270794
3	69124542	69282193	bA152N21	NaN	0.0170418	0.42116	0.608619	-0.094971	0.371226	-0.107133	-0.0200787
3	70368038	70528209	bA118O11	-0.668978	0.0824636	0.278725	0.641686	0.53987	0.814963	0.290258	-0.513625
3	71345362	71538914	bA154H23	-0.131604	-0.129907	-1.19683	-0.224039	-0.345903	-0.0882116	-0.164308	-0.0822759
3	72178390	72356608	bA522N9	0.775821	0.17547	-1.25384	-0.969221	-0.729959	-0.850192	-0.247804	0.0405564
3	72896245	73069152	bA425D6	0.292671	0.0778635	NaN	0.565667	0.538749	1.02895	0.246793	-0.198292
3	73186876	73335038	bA252O10	0.43598	-0.0483092	-0.254492	-0.0901741	-0.204635	-0.307935	-0.161947	0.313288
3	73577828	73748933	bA20B7	0.196435	-0.0128352	-0.437058	0.277137	-0.102548	0.570167	0.0463712	-0.10778
3	73957021	74114184	bA11L10	-0.0635051	-0.247802	-0.450998	-0.248039	0.0449955	0.00430961	-0.0305144	-0.334087
3	76111129	76204644	bA514J23	-0.0807044	-0.0482594	0.0840705	0.146299	0.244795	-0.207573	0.0349498	-0.345355
3	77373473	77377473	bA220O14	0.523949	-0.104817	-0.465338	0.115686	0.781381	0.834376	0.235245	-0.398422
3	78124957	78223872	bA16M12	0.21961	0.0768485	1.01844	0.425396	0.712612	0.654481	0.35061	-0.018801
3	78659509	78800652	bA333I20	0.11789	-0.0717201	-0.397256	-0.163198	0.123892	0.267982	-0.0334156	-0.104183
3	80133749	80297117	bA26H10	0.785539	0.0967634	0.984023	0.84479	0.165831	1.29833	0.34135	0.0927343
3	80345257	80511576	bA510B7	-0.0703169	0.0217114	-0.206748	-0.0163695	0.238641	0.306063	-0.0049089	-0.397095
3	81370437	81463037	bA442C9	0.473542	0.177794	-0.0308005	0.447175	0.370527	0.780528	0.471309	-0.0278714
3	81697789	81786468	bA359D24	0.285379	-0.176827	-0.698969	0.120546	0.164999	0.442386	0.310456	-0.262486
3	82378721	82522402	bA206J21	0.0471509	-0.183637	-0.54745	-0.578346	0.0384983	-0.121406	-0.0412256	-0.341572
3	83534865	83644980	bA382L10	0.0306232	-0.161572	-0.323568	-0.160586	-0.188088	-0.297867	0.0799927	-0.472971
3	84346772	84524804	bA474M18	0.0738219	-0.00976246	-0.337352	0.0122021	0.0206795	-0.797306	0.0755459	-0.345011
3	85811325	85991540	bA447J13	NaN	0.0941532	NaN	0.673964	0.802524	0.756235	0.354578	-0.282868
3	86841829	87021051	bA81P15	0.500799	0.172163	0.193816	0.671172	0.292458	0.745858	0.180356	-0.285434
3	87367137	87527557	bA312H1	-0.425278	-0.502991	-0.687943	-0.169361	0.0168984	NaN	-0.0544754	-0.302054
3	88559257	88602672	bA264F20	0.127248	-0.440572	0.896359	-0.126081	0.321564	0.438291	0.0689612	-0.65498
3	95318161	95504959	bA88I7	0.667285	0.0411305	-0.40871	0.171137	0.315858	0.683017	0.16976	-0.317875
3	95891701	96049008	bA12A13	0.46817	-0.035157	-0.932546	-0.386048	0.311403	0.250708	-0.205775	-0.406107
3	96820747	96975398	bA12J13	1.35322	0.311756	2.25314	2.48892	0.642348	1.92969	0.580048	-0.0165551
3	98322764	98513393	bA529P9	0.477301	0.0389379	0.379674	0.693023	0.448415	0.572969	0.187727	-0.140464
3	99055083	99086757	bA214N20	0.103634	0.231787	0.247917	0.0283176	0.164693	0.0601253	0.207716	0.00616684
3	99654938	99704485	bA569H14	-0.027519	-1.31244	0.302513	0.128375	-0.147979	-0.758369	-0.245194	0.0139208
3	100289280	100344133	bA121C1	0.611993	0.10051	0.989098	0.961671	0.538647	0.907054	0.307225	-0.245523
3	101277236	101430915	bA114I8	-0.161357	-0.479771	1.27266	1.77567	0.564072	-0.610913	0.499439	0.665801
3	102790178	102942826	bA49I4	0.0183976	0.13081	-0.123923	-0.0114478	0.358683	0.381675	0.293769	-0.22863
3	103939569	103972569	bA17H6	0.498162	0.212988	0.309807	0.456517	0.344227	-0.164473	0.518469	-0.191523
3	104979471	105146436	bA40M23	-0.778547	-0.110831	0.862417	0.403099	0.47867	-0.704405	0.466734	-0.0720677
3	105613789	105625056	bA115B22	0.289583	-0.0389924	0.0900402	0.550797	0.561599	0.587568	0.241259	-0.319974
3	106585358	106765037	bA91B3	-0.0283515	0.10319	0.0552128	0.30443	0.0922757	0.00865811	0.233554	-0.0410974
3	107432059	107469998	bA20N7	0.0246766	-0.371074	-0.742118	-0.545656	-0.148672	1.32254	-0.101441	-0.688905
3	108071506	108263827	bA561O4	0.456821	0.19822	1.14332	0.756981	0.0195987	0.44969	0.108535	-0.187806
3	109048453	109178940	bA25F15	0.127446	-0.253473	-0.385413	0.822031	-0.0741235	0.210097	0.14429	0.307257
3	109916599	110070948	bA93N14	-0.0519204	0.0101091	-0.310153	-0.221741	-0.0196892	-0.0729254	0.00648315	-0.0996879
3	111374645	111489923	bA286P15	0.162445	0.169421	0.391327	0.619732	0.740815	0.735466	0.475125	-0.118169
3	111857995	112024993	bA553A10	-0.162376	0.0669955	0.549697	0.0869582	0.133902	0.281607	0.101205	-0.209577
3	112588238	112738134	bA402J7	0.236996	-0.0684533	0.360539	0.220982	0.127626	-0.416106	-0.0297733	-0.105191
3	113563187	113778905	bA572C15	0.525209	0.0455971	0.361379	0.338752	-0.154964	0.759572	-0.15715	0.00774266
3	113776610	113782609	bA107J18	-0.324696	0.0815865	-0.468878	-0.222812	-0.191677	-0.452851	0.0246376	0.0437154
3	114545937	114693570	bA239J2	-0.480569	0.476999	2.00869	1.55451	0.461441	0.930962	0.437477	0.651755
3	116087301	116199426	bA58D2	-0.316021	-0.109208	0.452936	0.46995	0.312639	-0.412797	0.100276	-0.254057
3	116846785	116909134	bA249J17	0.277038	0.142448	0.57254	0.275095	0.202334	-0.531302	0.0763191	-0.091938
3	117952401	118125095	bA324H4	-0.730858	0.191991	1.3448	1.80331	0.43608	0.548623	0.57138	0.0489952
3	118882977	118956976	bA165B13	1.22768	-0.0507572	0.176714	0.395114	1.18122	1.98421	0.080325	-0.885123
3	119909462	120057915	dJ635B5	0.289162	-0.100082	0.458854	0.371822	0.231104	0.253359	0.141754	-0.0669407
3	120725019	120890111	bA169N13	0.402782	0.0472423	-0.303192	0.0966711	0.238785	NaN	-0.0073539	-0.148075
3	120888106	121003639	bA73F12	0.0216722	0.0312749	0.0888762	-0.166232	0.0916468	0.285652	0.21468	0.119345
3	120946819	121125129	bA767L7	-0.49859	-0.275747	-1.22706	-0.826425	-0.180817	-0.859311	-0.181138	-0.0497984
3	121449704	121646647	bA359H3	0.12226	-0.158543	-0.453283	-0.16031	-0.227507	0.391802	-0.228623	-0.207831
3	122177467	122339779	bA480B17	-0.0293067	0.445005	1.18679	0.149481	-0.298469	0.198357	0.129082	-0.380189
3	123285258	123430862	bA299J3	0.590499	0.0496273	0.223951	-0.2901	-0.32603	1.13062	-0.315777	-0.439434
3	123698287	123799155	bA457E6	0.301353	0.459662	-0.947869	1.08303	-0.197011	0.451997	0.163722	0.26464
3	124651974	124833147	bA9N20	1.15191	0.220331	-0.104725	-0.311787	-0.289658	-0.214917	0.0891855	0.712511
3	125035443	125232802	bA521J5	-0.887722	-0.266333	-2.40508	-1.56384	-1.49645	-1.31185	-0.495562	-0.0981984
3	125709391	125875461	bA71H17	0.0824846	0.442561	1.44217	0.237109	-0.0425268	0.00562347	0.132988	0.703001
3	127231190	127282190	bA205A6	0.243027	0.0314472	-0.884002	-0.446456	0.0263906	0.576888	0.0406849	-0.134466
3	127784608	127907541	bA321A2	0.886719	0.464341	1.10752	1.50151	0.241244	-0.183246	1.28423	0.514782
3	128398381	128550966	bA59J16	0.313462	0.384059	2.634	1.58951	0.378317	1.42927	0.737413	0.423164
3	129433209	129602791	bA475N22	-0.36578	0.164777	-0.729923	-0.720085	-0.154385	-0.439097	-0.230201	0.128588
3	129790668	129857352	bA221E20	0.00551057	0.346725	0.0711337	0.0304344	-0.0114327	-0.000625845	-0.170655	0.0883061
3	131256145	131415278	bA129J11	-0.219948	0.0137162	-0.106454	0.184072	0.11743	-0.450788	0.247414	-0.213159
3	131810679	131961180	bA21N8	0.921696	-0.202436	-0.248471	0.103775	0.635678	0.193867	0.0652579	-0.260895
3	132412008	132583569	bA517B11	0.675183	-0.110915	1.24019	0.278098	0.180815	0.287609	0.436464	-0.115119
3	133822607	133959239	bA48F15	0.519367	-0.209854	-1.36759	0.759003	0.697413	0.738933	0.409108	-0.252952
3	134417031	134570680	bA91K8	-0.361596	-0.128719	0.201027	0.21307	0.296915	-0.419612	0.127438	-0.193794
3	135642541	135811572	bA22E12	-0.810715	-0.0304794	-0.901091	-0.990408	-0.591252	-0.066965	-0.570851	-0.130407
3	136338073	136491360	bA91O5	NaN	0.0436929	0.380938	0.373171	0.193196	0.304624	0.0508227	-0.133026
3	137431849	137537988	bA311K2	0.278662	0.000649908	1.04263	0.60519	0.772574	0.135661	0.263441	-0.101375
3	137644183	137686933	bA197K1	0.275578	1.37527	0.331668	0.479188	0.285878	0.61383	-0.0903066	-0.173518
3	138231898	138416938	bA269A14	0.217222	0.0432695	0.0589496	0.548023	0.0198103	0.636461	-0.0496719	-0.0780109
3	138692044	138847064	bA2A4	0.0013171	0.00220435	-0.255608	-0.32774	-0.0426784	-0.113294	-0.0826813	0.0152039
3	140425645	140510868	bA349D24	NaN	-0.0457872	0.365065	0.111544	-0.146139	0.278977	-0.419611	-0.237445
3	141062276	141209378	bA89E16	-0.602617	NaN	NaN	-1.01682	-0.836331	-0.606582	-0.403002	-0.354333
3	141971330	142127227	bA231L11	-0.294294	0.426401	-0.538928	-0.403437	-0.446308	-0.73616	-0.262043	-0.0834854
3	142877341	143032560	bA235I18	-0.172127	0.236526	0.0824913	0.132689	0.0922827	-0.0663793	-0.170994	0.123301
3	144154889	144312261	bA160A13	0.441503	0.0247397	0.256098	0.885322	-0.0481706	0.703454	0.514568	0.209107
3	144645061	144711492	bA165M11	0.422779	-0.0662991	-0.0807708	0.305225	0.208966	0.490826	0.197753	-0.208171
3	145684104	145812603	bA200O17	0.161644	-0.00891864	0.0720396	0.351455	0.447084	0.548555	0.20016	-0.146874
3	146810288	146983743	bA88H10	0.197398	-0.187348	0.332414	0.47741	0.40459	0.54008	0.244277	-0.189382
3	147538167	147650355	bA21M4	0.0853171	0.0242876	-0.268273	0.0590647	0.201378	0.366161	0.0401204	-0.226016
3	149024197	149228712	bA500K7	-0.537255	-0.0289713	-1.74385	-0.157465	-0.189399	-0.0966586	0.0761099	-0.302785
3	149111640	149312037	bA501O2	0.211061	0.0826923	0.681144	-0.312118	-0.14451	-0.344159	-0.0528889	-0.0681149
3	150194653	150305700	bA268J1	0.0574824	0.342745	0.980316	-0.222343	0.0390455	0.340039	-0.193454	-0.372841
3	151307389	151477747	bA145F16	-0.966209	0.0598294	-0.673592	-1.51697	-0.512048	-0.651334	-0.0723206	0.0329472
3	151899193	152078689	bA251C9	-0.270356	0.165868	-0.0324216	-0.730182	-0.392457	-0.677668	-0.246706	0.313476
3	153000409	153170597	bA3F11	0.96164	0.101002	-0.618404	1.25191	0.649975	0.12669	0.655251	0.346472
3	153144942	153314616	bA30J14	0.882998	0.00300473	-0.0550379	0.858621	0.61889	1.32329	0.505078	0.0161733
3	153301188	153496617	bA362A9	1.34982	-0.0610553	-0.447189	1.09096	1.42084	1.46321	0.261838	-0.649324
3	154036975	154235144	bA529G21	-0.37307	-0.49297	-0.785011	-0.676922	-0.106138	-0.739608	0.0167655	0.396761
3	154754672	154885813	bA223L18	0.111473	0.00690944	0.447402	0.165943	0.263948	0.409844	0.118335	-0.147067
3	156440983	156608976	bA117L15	0.617053	0.108688	0.903323	0.177979	0.307577	0.221009	0.109745	-0.0204731
3	156912160	157085112	bA111F10	-0.200021	-0.217343	0.0826909	-0.0983902	-0.220096	-0.0492054	-0.136069	-0.192395
3	157974716	158122235	bA6F2	-0.273358	-0.108433	-0.630199	-0.260118	-0.243126	-0.377471	-0.201021	-0.601826
3	158817699	158979205	bA90N21	0.102212	0.0188316	-0.44811	0.24226	0.13305	0.0817668	0.171743	-0.189208
3	159389659	159578717	bA538P18	0.144949	-0.0878642	3.2022	-0.0163835	0.0959534	1.79033	0.367807	-0.190326
3	160726431	160903094	bA209H21	0.0702773	-0.204121	-0.379446	-0.586601	-0.21443	-0.197221	-0.175651	-0.375582
3	160880530	161037608	bK2049J23	-0.129293	-0.116107	-0.807696	-0.667248	-0.258172	-0.559677	-0.27298	-0.184657
3	160943620	161119727	bA67F24	0.59409	0.236584	1.01167	0.0200678	-0.0180609	1.07672	0.130342	0.149978
3	161843571	161985697	bA203L15	0.342712	0.131199	1.08109	0.601136	0.437096	0.580242	0.259696	-0.17433
3	163329244	163447014	bA498P15	-0.43298	-0.0293871	-0.512887	-0.699272	-0.274383	-0.590451	0.0260302	-0.0437383
3	164366669	164516637	bA90M7	0.199516	-0.00333926	0.36866	0.309067	0.215174	-0.718978	0.211138	-0.175849
3	165182220	165357549	bA198G24	0.46134	0.0164201	0.417765	0.124223	0.403821	0.915593	0.198759	-0.293571
3	165963094	166129564	bA81E19	-0.702774	-0.116405	-0.816803	0.80368	0.588367	1.73317	0.385374	-0.283925
3	166828468	166999550	bA491K7	-0.549564	2.08626	-0.393429	-1.54211	-0.598333	-0.819681	-0.272817	-0.130442
3	167262375	167420598	bA12N13	0.825919	0.309115	0.568921	1.37986	0.266376	0.086591	0.57393	-0.0262513
3	168595530	168607254	bA264D7	-0.0802198	0.125387	-0.766805	-0.523325	-0.422519	0.0292517	-0.0957393	-0.00769582
3	169463831	169651487	bA395F21	0.557792	0.0691025	1.29294	0.880885	0.215267	0.305452	0.148335	0.0572992
3	170325109	170368452	bA141C22	NaN	0.317255	0.391897	0.0520323	0.318911	0.59476	-0.103859	-0.481463
3	170651542	170851376	bA3K16	0.45276	-0.349446	0.2437	0.34712	-0.0135693	1.12662	0.0428841	-0.448984
3	170849280	170896880	bA816J6	-0.280483	-0.101917	-0.47041	-0.677103	-0.301872	-0.274309	0.00127931	-0.393389
3	170894922	171020366	bA362K14	-0.400981	-0.0830981	-0.612017	-0.456851	-0.0867057	-0.114864	-0.274473	0.277288
3	173100830	173267359	bA163H6	0.397044	-0.00848783	0.176471	0.00826761	-0.0650414	0.499086	-0.341914	0.260624
3	173610937	173775108	bA44A1	0.164973	0.187445	0.0677711	0.135404	0.350849	0.586834	0.165503	-0.000814548
3	174306001	174464172	bA569P10	-0.514906	0.0978666	0.730691	-0.818178	-0.48179	0.309867	-0.255588	0.507824
3	175307357	175497987	bA477P16	-0.0364309	-0.0641625	0.0659649	-0.412078	0.152682	0.26012	-0.0258459	-0.388853
3	177604260	177768984	bA71G7	0.243884	0.00634955	-0.278504	0.361057	0.267334	0.472225	0.0563737	-0.11753
3	178067915	178237547	bA484D18	-0.863611	-0.201722	-0.535957	-0.888779	-0.183999	-0.59845	-0.386918	0.0699421
3	178890870	179048508	bA91K9	0.112124	-0.0388751	-0.342093	0.167769	0.1563	0.331407	-0.00366797	-0.234689
3	179511147	179653388	bA21C11	0.337245	-0.0924736	-0.851843	0.137946	0.408874	0.682146	0.299301	-0.129059
3	180212677	180360600	bA682A21	0.00865041	0.164969	-1.01212	-0.838642	-0.264711	0.102108	0.0525197	-0.0815746
3	180867447	181028456	bA45I24	-0.0930569	0.142091	0.479938	0.0372226	0.0941421	-0.439608	-0.108122	0.320015
3	181373289	181566496	bA420J11	0.384985	0.0534799	0.124069	0.460029	0.270008	NaN	0.279803	-0.248394
3	181648042	181706151	bA510K16	-0.0226446	-0.0931833	-0.634076	-0.0588971	0.187217	0.141494	0.175111	-0.169747
3	182239321	182381916	bA445C21	-0.16725	0.279082	-0.275367	-0.114077	0.139223	0.227396	0.0909822	-0.0138182
3	183094286	183272602	bA416O18	0.0258304	0.000687599	0.136974	0.237371	-0.0136987	0.197867	0.189538	0.0240522
3	184008761	184121261	bA531F16	-0.930048	-0.0228067	-1.09764	-1.68426	-0.913646	-1.48968	-0.412446	0.38487
3	184722221	184913466	bA14I2	0.186062	-0.0503637	-0.160111	-0.109258	-0.136363	-0.364704	-0.131839	0.120257
3	186531560	186687457	bA110C15	0.25907	0.213568	1.37026	0.545454	0.219742	0.291925	0.273744	0.108323
3	187218924	187289578	bA65J14	0.222458	0.41041	-0.507931	0.0837384	0.0438482	-0.333969	0.0360121	0.268156
3	187906177	188010360	bA119E13	0.0738117	0.123085	0.254197	-0.122174	-0.017546	-0.624494	-0.307583	0.433283
3	188612805	188779446	bA88P6	-0.324378	0.0361561	0.6398	-0.245437	-0.114609	NaN	-0.0469522	-0.0268635
3	189651195	189838091	bA298A18	0.673867	0.0351785	-0.664964	1.27265	0.720108	1.74341	0.555948	0.0302431
3	190480659	190651264	bA178K17	0.211185	0.12301	-0.640407	0.511063	0.226729	0.512424	-0.11244	-0.0208912
3	191414828	191576344	bA392H18	0.288333	-0.0179034	-0.41781	0.207078	0.683177	0.515815	0.234059	-0.396966
3	191570667	191754869	bA211P13	0.59922	0.183077	-0.157432	0.693169	0.239163	0.675986	0.0858509	-0.233797
3	192417779	192503536	bA525C11	0.319984	NaN	-0.358387	0.0366495	-0.181558	0.0582955	0.147153	0.0803741
3	193387523	193550121	bA466I16	-0.39478	0.0280032	-0.358607	-0.0874381	-0.177917	-0.701187	0.0387992	-0.148313
3	193892032	193943146	bA56C4	0.534446	-0.0568295	0.681978	0.304186	0.337284	0.410807	0.0875774	-0.244822
3	194458136	194558136	PAC196F4	-0.332751	-0.208685	-0.818743	-0.608015	-0.0775591	-0.476345	-0.0130021	-0.0479982
3	194469529	194639472	bA552A14	-0.154108	-0.0569333	0.540444	-0.198882	-0.198516	-0.219572	-0.202355	-0.159099
3	195457131	195549117	bA279P10	-0.482914	0.320155	-0.774404	-0.843365	-1.1278	-0.926703	-0.378984	-0.545326
3	196534006	196687901	bA506F8	0.0280151	0.0509383	-1.16368	1.07057	0.566877	0.494582	0.961601	1.25812
3	197315053	197327472	bA252K11	-0.621979	0.0964333	NaN	-0.272987	0.0175666	-0.597043	-0.0150534	0.596056
3	198262688	198451396	bA114F20	0.458322	0.0223609	0.713583	1.1882	0.0721509	-0.0927164	0.366104	-0.579843
3	198972937	199056936	bA23M2	-0.21526	0.401489	0.710848	0.181338	-0.103446	-0.177374	0.168377	0.754081
4	4	39576854	bA343C9	-0.875843	-0.437761	-0.177293	-0.875457	-0.921514	-0.942774	-0.721781	-0.0913305
4	73000	173000	PAC1064E20	-0.51958	NaN	NaN	-0.51793	-0.01955	-0.84929	-0.321168	0.479801
4	1117981	1250256	bA296G16	-0.280304	-0.177674	-0.705077	-0.180759	-0.0521998	-0.54503	-0.199357	-0.0138825
4	1586839	1776061	bA572O17	0.0921356	0.0681125	-0.321031	-0.232789	0.141899	0.0967196	-0.321566	0.201031
4	2644489	2700384	dJ323A24	-0.16136	-0.054294	-0.00347977	-0.100512	-0.0244267	0.0130778	-0.150501	0.232811
4	2656057	2728512	bA11O12	0.798033	0.071331	1.63241	1.06773	0.439595	1.14364	0.319136	-0.111283
4	3433993	3588444	bA492I23	-0.190229	0.374479	1.66126	-0.132805	0.175832	1.38116	0.0322268	0.327891
4	4117200	4308795	bA324I10	0.198515	-0.0985337	-0.831609	-0.817908	-0.276164	-1.40766	-0.335827	0.627163
4	5035888	5232746	bA326O23	0.069109	0.0331982	0.0885952	0.09624	-0.0140841	0.388164	0.000595696	-0.018994
4	7263781	7350648	bA565I3	0.146145	-0.0658797	-0.0262114	0.0161401	-0.132954	0.15299	0.101078	0.272352
4	8007313	8221410	bA338K13	-0.505216	0.0636224	-0.00748255	-0.799776	-0.205753	-0.445995	-0.568921	-0.301511
4	8221407	8385354	bA117J13	0.124466	0.126877	0.305413	-0.23002	0.656825	0.0197549	-0.311288	-0.177909
4	10321619	10453202	bA61G19	-0.593496	-0.137615	-0.95625	-0.265932	-0.109411	-0.25597	-0.224982	-0.13321
4	10719767	10884622	bA270I3	-0.0151478	-0.242787	0.107007	0.15586	-0.041769	0.294001	0.101101	-0.0929551
4	11569894	11643370	bA168E17	0.798438	-0.0646205	-0.597974	-0.235881	0.167213	0.985721	0.093553	-0.575745
4	12489575	12666000	bA22A3	NaN	-0.314263	0.265839	0.092035	0.302049	0.268762	0.115024	-0.295511
4	13593959	13690104	bA341G5	-0.440496	0.41321	0.215118	0.25653	0.0882227	-0.83512	0.152597	-0.450346
4	16098484	16264456	bA446J8	-0.351983	0.05132	0.587166	0.161719	-0.00847368	0.0968101	0.147257	-0.0871088
4	18109825	18278448	bA441O12	0.614224	-0.0432129	0.0972027	0.524137	0.162545	1.09234	0.516474	-0.39392
4	18816626	18937461	bA3J1	0.176452	-0.156859	1.51259	1.24511	0.504885	0.0828969	0.433283	0.14313
4	19721872	19844840	bA339D20	0.627922	0.138303	0.601473	0.496188	0.590069	1.39669	0.224079	-0.0891451
4	20427149	20611191	bA362J17	0.26403	-0.160208	-0.104121	-0.116975	0.0728818	0.228775	0.323472	-0.0664848
4	21561552	21668907	bA84G22	0.430908	-0.358051	-0.275543	0.881046	0.134204	0.698292	0.103579	-0.11624
4	22243031	22370178	bA10G12	-0.293143	0.000318639	-0.431095	-0.0740553	-0.104198	-0.335664	-0.122614	0.134216
4	23036134	23058059	bA406E22	-0.115987	0.00191272	-0.131842	0.0859751	0.635573	-0.000639545	0.34768	-0.494088
4	24158382	24329509	bA192P23	-0.0630019	0.315722	1.0492	-0.293773	-0.0334396	-0.226564	-0.0078575	0.000405706
4	25072525	25197756	bA419L16	-0.424702	0.0533666	-0.486324	-0.46415	-0.481298	-1.18592	-0.125221	0.445898
4	25482489	25487584	bA421A17	0.239043	0.318282	0.565035	0.571703	0.0413044	0.250861	-0.0416842	0.105068
4	26825858	26977409	bA415C15	NaN	0.178284	NaN	0.711337	0.228022	-0.890151	0.334872	-0.217315
4	27165625	27315672	bA328H16	0.252748	0.149842	-0.176403	-0.0891812	0.119064	0.213804	0.541948	-0.230432
4	28425855	28527785	bA292B1	1.3846	-0.0636863	-0.281752	1.66	0.519263	-1.06204	0.420597	-0.0888481
4	29460286	29637752	bA390C19	0.243035	-0.00597235	0.030926	-0.163609	0.322773	0.352827	0.125341	-0.245255
4	31196933	31353434	bA478O20	-0.508574	-0.201227	-1.72999	-0.803538	-0.404653	-0.475385	-0.0471044	-0.296981
4	31659162	31822249	bA280K20	0.550517	0.0253047	0.0221142	0.561297	0.145417	0.515792	-0.0736646	-0.0480009
4	32296360	32450633	bA20M7	0.618503	0.00664524	0.419976	0.543612	0.560521	0.137297	0.338419	-0.3967
4	33708757	33871127	bA79E3	0.624789	0.117259	-0.43864	0.0600309	0.309802	0.788376	0.187868	-0.166939
4	34720126	34738489	bA24H13	0.259852	0.0222885	-1.68531	0.161296	0.404394	0.934643	0.534429	0.66026
4	35365058	35558567	bA135M12	0.386998	0.0706763	0.500968	0.473105	0.459009	0.492414	0.105617	-0.400794
4	36833102	36996402	bA103J17	0.423522	-0.149078	0.357956	0.219234	-0.0517526	0.543711	0.0371318	-0.0664713
4	37350336	37511405	bA36B15	NaN	0.0934861	-0.334239	-0.362932	-0.609951	-0.731944	-0.226627	0.305116
4	37863123	37950447	bA392K14	-0.359744	0.14508	-0.361567	-0.270743	-0.345833	-0.756425	-0.280318	0.293179
4	38333901	38430382	bA213G21	-0.219363	0.186359	-0.157469	-0.254385	-0.40862	-0.570723	-0.267295	0.207658
4	40249489	40343964	bA106O22	0.0543872	-0.387562	-0.791589	-0.558675	-0.902837	-1.26735	-0.507771	0.0558604
4	41495231	41682297	bA227F19	-0.332165	-0.0558314	-0.519993	-0.380254	-0.622762	-0.170197	-0.107554	0.102121
4	42486000	42665752	bA109E24	0.0951088	-0.0426426	-0.170682	0.190481	0.155368	0.325051	0.0960124	-0.218855
4	43993020	44196739	bA542I3	-0.585877	-0.574195	-1.76075	-0.965802	-0.723371	0.288633	-0.149354	-0.190365
4	44684177	44830849	bA55C6	0.676439	-0.125906	-0.296171	0.567006	0.672341	0.85358	0.180865	-0.25064
4	45763351	45935822	bA416A5	0.738471	0.0537371	0.691531	0.826034	0.510449	0.729032	0.285642	-0.234045
4	47419175	47587351	bA100N21	0.244166	-0.129787	-0.346337	0.00348124	-0.0845739	0.306281	0.00255708	-0.308686
4	47832949	47945135	bA415L23	-0.0388728	0.0861904	0.54299	0.282134	-0.150876	0.21735	0.138834	0.154065
4	48720455	48746455	bA19F13	-0.453286	0.107636	1.19364	1.00737	0.321678	0.590121	0.248025	0.0687726
4	52510041	52688025	bA365H22	-1.13778	0.106358	-2.05367	-1.9742	-0.995379	-2.03784	-0.664477	0.590559
4	53206265	53354157	bA157C8	0.132136	0.138316	0.318123	0.248385	-0.00535193	0.235396	0.0114477	0.0167443
4	54269793	54359963	bA18M17	-0.107542	0.186238	0.318091	0.144591	-0.164176	-0.075408	0.102602	0.186761
4	54977258	55109421	bA231C18	-0.422308	0.116219	-0.118887	-0.528432	-0.552111	-0.331638	-0.433695	-0.0669488
4	56011346	56085399	bA148K14	-0.0703084	0.0611051	0.191172	0.21222	-0.0394277	0.66717	-0.0930916	0.274401
4	57602233	57805706	bA738E22	0.247601	0.261591	-0.243943	0.355066	0.0719204	0.810022	-0.465084	-0.444009
4	57624385	57675060	bA355L4	-0.696075	-0.308918	-0.309125	-0.612302	-0.114249	-0.679324	-0.276614	0.211417
4	58341151	58504946	bA4O3	0.592348	NaN	0.205629	1.72161	0.354405	0.156816	0.259182	0.130862
4	59788461	59961559	bA340A13	-0.164165	0.0140719	-1.42686	-0.818954	0.281905	0.292748	0.238281	-0.493882
4	60474735	60613958	bA525J21	-1.49934	-0.130309	-1.91246	-0.0324757	0.172789	-1.79069	0.133346	-0.461052
4	61068919	61255010	bA507B10	0.364133	0.0642256	0.318095	0.326817	0.23492	0.471821	0.0739515	-0.210445
4	61906044	61999317	bA16N2	0.0193293	-0.104634	-0.0334716	-0.10088	-0.0929987	-0.0149165	0.00195258	-0.148167
4	62587156	62708857	bA24I7	-0.311222	0.12792	0.229914	0.172738	0.318854	0.199756	0.107748	0.0502776
4	64026045	64228551	bA553E5	-1.09919	0.242502	-1.06343	0.497628	0.703421	0.731773	0.159406	-0.233325
4	65123062	65288065	bA204H9	-0.046085	-0.0159739	0.0681343	0.744362	0.328401	-0.0364808	0.12652	-0.0152614
4	66021380	66223286	bA423P14	-0.233488	-0.251855	-0.424664	-0.674521	-0.0238464	-0.034034	-0.272388	-0.222582
4	67307856	67359733	bA211G17	0.827688	0.0344001	0.926192	0.598537	0.868788	1.34222	0.420757	-0.387682
4	67518449	67687144	bA540I12	-0.996182	-0.0697471	0.141758	0.0356005	0.263587	-1.68071	0.12069	-0.242306
4	68745422	68902499	bA35D5	0.768213	0.21564	0.295472	-0.219541	-0.270892	-0.348547	-0.160816	0.209719
4	69910115	70128105	bA468N14	0.129667	-0.0268522	-0.902045	-0.781075	-0.00856486	-0.117836	0.313742	-0.198816
4	72061110	72215522	bA92H22	-0.312847	0.135545	0.186774	-0.0561932	0.115999	NaN	0.0661354	0.248445
4	72447307	72587412	bA1J11	-0.111943	-0.0942846	-0.714447	-0.17085	-0.0247666	-0.0947669	-0.0564482	-0.123203
4	73503146	73680138	bA373J21	0.159322	NaN	NaN	-0.00383506	0.165445	0.439902	0.0313889	-0.318478
4	74970181	75048589	bA447E20	0.466219	0.39885	1.2474	-0.26739	0.195414	-0.00243469	0.149368	0.048977
4	75282894	75452153	bA2G10	-0.27328	-0.0149861	-0.580797	2.7455	1.24359	NaN	0.800184	-0.0132533
4	76710498	76906860	bA567N4	0.421818	-0.0605426	1.01669	0.766641	0.401466	0.573915	0.194994	0.0150714
4	77956327	78013351	bA224D4	-0.399237	-0.072511	0.267815	-0.267173	-0.254945	0.280644	-0.0190472	-0.0392177
4	78370029	78516614	bA1E1	0.658801	-0.269475	-0.0283105	-0.542365	-0.360816	-0.213501	-0.192011	-0.143465
4	79259989	79368756	bA180L13	NaN	-0.0818832	0.0557559	-0.138896	-0.691535	-0.342922	-0.321907	0.0489548
4	80557632	80720888	bA438E5	0.542668	-0.0474704	NaN	0.245046	0.402297	0.383117	0.421758	-0.251339
4	81489983	81684140	bA377G16	-0.137165	-0.219574	-0.973915	-0.345576	-0.122833	-0.294534	0.0174918	-0.448815
4	82390064	82506757	bA100N20	0.00451022	-0.137906	-0.0242696	0.318149	0.493858	0.41167	0.275644	-0.375047
4	83436413	83522720	bA263F19	0.184822	-0.00803489	0.156416	0.567656	0.204344	-0.546888	0.112388	0.0740524
4	84861481	84957048	bA397K17	-0.675258	0.124744	-0.159557	-0.633083	-0.52392	-0.324939	-0.416429	0.309952
4	85339432	85487158	bA176K15	0.0354427	-0.0287029	NaN	0.287241	0.253523	0.581252	0.3662	-0.345328
4	86599622	86732206	bA123I8	0.679847	0.507028	-0.35835	0.329039	-0.0614457	0.710616	0.374167	-0.339548
4	87679441	87780240	bA19C20	0.0814328	-0.312978	2.08946	0.527398	0.0689767	-0.176439	0.199741	0.344378
4	89083234	89270857	bA113G13	0.151239	1.10094	2.42323	0.198072	0.254343	0.259468	-0.0529858	-0.100798
4	89852485	89971524	bA17P8	-0.257111	0.0671465	8.97e-05	0.217245	0.218447	0.192243	0.0899271	0.157726
4	90203032	90374304	bA502A23	0.28173	0.0661386	1.46391	0.265328	0.207264	0.316162	0.0859736	0.0479235
4	90928929	91098412	bA115D19	0.152545	0.163458	-0.073116	0.441299	-0.15592	0.374465	0.00272426	-0.136114
4	91927511	92076126	bA11N6	2.35977	0.348299	2.28721	2.33729	1.39076	2.69546	0.868931	0.442846
4	93595193	93705052	bA9B6	0.0724697	0.0394722	0.77506	1.44214	1.17185	1.85021	0.612533	-0.429028
4	93804601	93935424	bA44P19	1.10163	-0.0521588	0.345921	1.04177	0.796006	0.663786	0.364588	-0.518125
4	94836626	95012134	bA16I17	0.403124	NaN	NaN	0.373818	0.329801	0.63766	0.21449	-0.275334
4	96532461	96691666	bA10L11	0.0146723	-0.321288	-0.405765	0.17727	-0.193508	0.0189287	0.0324638	0.192809
4	97247294	97299957	bA354C17	0.597473	-0.259212	-1.42044	-0.362161	0.160219	NaN	0.099558	-0.456387
4	98796646	99007208	bA242D9	0.0970542	-0.0740477	NaN	0.18158	0.266807	0.453488	0.183789	-0.200886
4	99006136	99071345	bA240J11	0.00267601	-0.180792	0.0237784	-0.229119	0.206967	0.111908	-0.12469	-0.119086
4	100120356	100232658	bA428B4	-0.324199	NaN	-0.39078	0.0297831	-0.311822	-0.32409	-0.207268	0.208544
4	101288991	101463429	bA56D20	0.516518	-0.091756	0.0272091	0.567838	-0.0992597	0.526774	0.09657	-0.262306
4	101684333	101845851	bA13F20	0.0227348	-0.0550927	0.871132	0.732191	0.27529	0.026056	0.131988	-0.136128
4	101986954	102137120	bA167N19	0.330052	1.72953	-0.844755	-0.268678	0.103168	-0.774797	0.0415992	-0.410158
4	103205373	103358788	bA110C16	0.0908151	-0.251843	-0.639217	-0.424536	0.393735	0.0463427	0.1789	-0.33387
4	104580654	104606997	bA438P8	-0.574048	0.123966	-0.0799743	-0.515175	-0.738462	-0.793582	-0.146769	0.327414
4	104604998	104688878	bA174B22	0.406743	0.0114284	0.508661	0.587159	0.373867	0.669921	0.145253	-0.177641
4	105462123	105531585	bA122B24	0.489108	0.0104895	0.206016	0.882874	0.712628	1.03483	0.275822	-0.244757
4	106509993	106683059	bA16G16	0.258085	-0.082492	-0.794518	0.00233362	-0.437389	0.432455	0.133594	-0.118074
4	107201747	107238688	bA208O6	-0.195756	0.165383	0.347135	-0.0762961	-0.0156873	0.194361	0.0491882	-0.0236376
4	107874843	108081943	bA88D10	0.233317	-0.176555	-0.612636	-0.199392	-0.151901	0.340406	0.0977798	-0.0531715
4	108820688	108970859	bA109F18	0.258813	-0.161043	-0.224053	0.0882315	0.36688	0.386939	-0.0218091	-0.161641
4	110050784	110201356	bA75N20	-0.223946	0.129139	0.390451	0.086961	0.0304411	0.325232	-0.0430726	0.0334945
4	110195936	110363348	bA57A22	-0.511514	-0.245329	-0.0514478	0.274032	0.18989	0.340582	0.104339	-0.235271
4	111834203	112035829	bA380D23	NaN	0.00278084	-0.295888	-0.0817923	0.139588	0.657876	0.0917875	-0.0644481
4	112533648	112678158	bA326N15	0.439016	-0.187055	-0.0485833	0.139339	0.353391	0.463833	0.197304	-0.241577
4	113026890	113068227	bA77N9	-0.615094	0.387359	1.41089	-0.34744	-0.746579	-1.0584	-0.164874	0.355018
4	113773575	113953271	bA402J6	0.177911	0.088703	0.431221	0.115879	0.103067	0.250571	0.174346	-0.053794
4	116494788	116646176	bA419E3	0.194697	-0.086256	-1.45784	-0.607244	0.0579367	-0.477833	0.232923	-0.322171
4	116921925	117110838	bA25B14	0.445566	0.06932	0.360036	0.200012	0.520734	-0.850527	0.330334	-0.288111
4	117753464	117917514	bA55L3	0.517047	-0.158561	0.479226	0.626375	0.872826	0.8529	0.0195886	-0.369471
4	118815521	118991546	bA510D4	0.337492	-0.0691478	2.54354	0.388518	0.402382	0.519388	0.350874	0.112791
4	120062268	120209358	bA100C9	0.16763	-0.25858	-0.216735	-0.113059	0.124208	0.182599	-0.0203252	-0.303757
4	121417056	121478557	bA414D7	0.112542	-0.130096	0.556877	0.842036	0.372944	0.297777	0.282644	-0.212498
4	121889570	122079790	bA501E14	-0.503368	-0.13534	-1.36098	-0.0455826	0.354477	0.409536	0.0919993	-0.177326
4	122663708	122833934	bA364P2	0.142811	-0.106503	-0.015995	-0.0577762	0.240093	-0.0320526	0.0439674	-0.111494
4	124075849	124174032	bA335O22	-0.682227	-0.102013	-0.354503	-0.0375891	0.208988	-0.878103	0.326417	-0.222835
4	124726095	124851245	bA381N20	-0.298501	-0.0114775	-0.923905	-0.172758	-0.492268	-0.41426	-0.221896	0.016786
4	125687511	125844078	bA93I21	0.642872	-0.107816	-0.314052	0.217927	0.44606	0.707776	0.213262	-0.351809
4	126528468	126693514	bA15O17	0.0841018	-0.0822042	0.89746	1.53955	0.0838309	0.208773	0.574698	0.296967
4	127424197	127608317	bA282B13	0.680458	-0.166189	-0.426888	0.566948	0.446486	0.956528	0.0233565	-0.335434
4	129531937	129633348	bA555L17	0.0246436	0.15151	1.05962	0.0741822	-0.100233	-0.16848	-0.0182563	-0.0951757
4	130174860	130296568	bA209D20	0.0832305	0.135486	0.661185	0.569404	0.159022	-0.157187	-0.00649205	0.102883
4	131269841	131373406	bA125F12	0.228303	NaN	0.242579	0.405483	0.184957	0.285083	0.0761292	-0.00227052
4	131752589	131905426	bA24P18	0.301016	0.0299176	0.0295177	0.127004	0.120704	0.481161	0.145136	-0.228541
4	132827311	132851333	bA314N14	0.00177733	0.187787	2.68262	2.6776	0.334346	-0.314264	1.67194	0.84812
4	133204369	133204824	bA229G4	-0.611567	0.630036	-0.0649925	0.435611	-0.0102437	-0.478284	0.0387012	0.0296655
4	133837962	134010380	bA149A7	0.370533	-0.102282	0.912276	0.70533	0.428734	-0.422736	0.114026	-0.261084
4	134545830	134698626	bA335K21	0.268321	-0.201341	-0.799697	-0.489731	-0.147521	0.731875	-0.146502	-0.1118
4	135637820	135814568	bA400D2	-0.857306	-0.186245	-0.193173	0.272426	0.626702	-1.19571	0.0780312	-0.557403
4	136741864	136908874	bA127A9	0.399712	0.102152	0.32074	0.531383	0.347069	1.36928	-0.207529	-0.297443
4	138188171	138350070	bA63M2	-0.616106	-0.251453	-1.16873	0.0660629	-0.0578126	-0.495122	0.105456	-0.30103
4	138619496	138796522	bA425J20	0.34547	0.0153467	1.23351	0.530664	0.327143	0.406503	0.292116	0.041717
4	140076097	140244665	bA98O2	-0.0440886	0.00362257	-0.765507	-0.195467	-0.169487	-0.213042	0.130926	0.0746019
4	140936245	141014160	bA5O9	0.0042533	-0.151453	-0.541583	-0.790928	-0.166591	-1.07249	-0.444375	-0.0210112
4	141741731	141912428	bA69O1	-0.173901	0.104078	-0.815998	-0.21376	-0.110942	0.515364	-0.080733	-0.113756
4	142647924	142834138	bA362F19	0.569358	-0.0973032	0.438345	0.491234	0.443563	0.519559	0.217827	-0.374121
4	143727457	143867568	bA484P7	-1.12388	-0.606183	-1.65846	-1.60431	-0.631226	-1.32145	-0.383815	-1.15295
4	144001065	144120858	bA141I1	-0.356254	0.218546	0.883249	-1.1548	-0.0471983	0.769385	0.000161243	-0.113838
4	144614731	144779977	bA364L4	-0.660328	-0.0119103	0.257068	-0.968715	-0.595461	-1.08263	-0.267243	0.205733
4	145795945	145882188	bA519A11	1.25714	-0.271199	1.44107	1.45682	0.883984	1.75575	0.811871	-0.020211
4	146805284	146971212	bA301H24	0.0898057	-0.116771	0.169834	0.588691	0.290241	0.682471	0.140512	-0.18854
4	147176570	147336538	bA181K12	-0.0114415	0.0324487	-0.640453	-0.146709	0.351121	0.418082	-0.130758	0.0859532
4	149001370	149198594	bA425A23	-0.542103	0.0675131	0.413671	-0.231865	-0.0930862	-0.431757	0.0671689	0.331138
4	150011632	150145162	bA503L19	-0.923878	-0.0969185	-1.14005	0.316338	-0.0344306	-1.14895	0.170454	-0.267242
4	150828066	150983689	bA481K13	-0.412932	-0.326822	-1.10057	-0.837006	0.113983	-0.583954	0.0265249	-0.188833
4	151819912	151965491	bA64M20	1.03133	-0.237014	-0.0079388	-0.167336	-0.363231	0.80118	-0.137068	-0.269569
4	151985284	152129302	bA28E24	0.395818	0.112609	0.805365	0.612553	0.273511	0.694495	0.200665	0.0239371
4	153013580	153154773	bA164P12	0.126929	-0.298472	-0.498147	-0.188414	0.0380507	-0.414776	-0.159652	0.0463745
4	153209896	153296414	bA503L23	-0.422632	-0.102662	-1.02981	-1.05846	-1.05176	-0.43934	-0.542732	-0.0125656
4	155105181	155306285	bA259G7	-0.355586	-0.49831	-1.68051	-0.944431	-0.43198	0.386479	-0.0729865	-0.112869
4	157912091	158085079	bA171N4	1.21417	0.355424	0.262727	1.82765	0.363518	0.188608	0.59461	0.1541
4	158822774	158950210	bA17C4	0.556937	0.0186499	0.548838	0.719428	0.395417	0.530066	0.277843	0.0574083
4	161159900	161301979	bA6C14	0.0870377	-0.180264	-0.540461	-0.19202	0.0124747	0.214001	-0.213755	-0.714582
4	162020677	162097332	bA502F14	-0.416572	0.297605	0.126159	0.56863	0.134426	1.50497	0.0686508	0.442926
4	162458497	162554508	bA47G2	-0.517355	0.479556	-0.603684	-0.570593	-0.397207	-0.248935	-0.0348226	-0.0419139
4	163606001	163749613	bA1G8	0.0917862	-0.087017	-0.437722	0.146279	0.209356	0.485926	0.252387	-0.181061
4	164773978	164934830	bA218F10	-0.0014764	0.0614531	0.298933	0.0630846	0.0195981	-0.0237707	0.149368	-0.0301612
4	166487215	166665738	bA336N6	NaN	-0.0556849	0.586326	0.328349	-0.17375	0.328785	-0.0735877	0.112633
4	166878298	167055857	bA25N12	NaN	0.109441	0.87375	0.301416	0.169674	0.639255	0.0171782	-0.106857
4	168193229	168367049	bA440L13	-0.00739347	-0.0556384	-0.122493	0.0132576	0.0929937	0.403182	-0.0998495	-0.180082
4	169319245	169457280	bA423O13	-0.797989	-0.0417569	-1.38895	-1.25642	-0.561979	-1.10017	-0.282639	0.0352476
4	172096650	172262953	bA13N11	-0.673721	0.149864	-0.856418	-0.321165	0.318011	0.788735	0.169785	-0.213554
4	172304719	172462989	bA213L8	-0.118798	-0.175826	-1.21596	-0.238852	0.0905027	0.109853	0.0786688	-0.158513
4	172661545	172727073	bA384D10	0.52413	-0.38742	-0.990029	0.218948	0.391188	0.599929	0.0896647	-0.36397
4	173588498	173758054	bA119J20	0.786924	-0.00585606	-0.206458	0.255863	0.167276	0.186115	-0.00460942	0.0275729
4	174307975	174484897	bA140M23	-0.000396462	-0.0845841	0.135817	0.0106371	0.0558686	0.0559958	0.0832928	0.122798
4	175690947	175836442	bA148L24	0.45456	-0.0340727	-0.565961	0.238439	0.542317	0.705676	0.28073	-0.0771562
4	176695234	176916111	bA287F9	-0.778609	0.147144	0.247003	0.352949	0.230488	-0.107828	0.146861	0.178524
4	177753352	177971272	bA87F15	-0.310509	-0.479013	-0.455971	-0.257566	0.0844862	-0.164346	0.141748	-0.0266153
4	178704925	178821168	bA2B17	-0.258079	1.87656	-2.89586	1.03201	1.3206	0.41582	0.44812	1.84222
4	179441780	179541864	bK499I20	-0.200923	-0.308953	-0.823777	-0.293428	0.0735583	-0.391683	-0.478611	-0.365813
4	179753550	179929557	bA84H6	0.363222	-0.0408081	-0.935114	-0.29032	0.431806	1.02314	-0.18883	-0.778176
4	180182262	180354006	bA495H13	0.0218263	0.206092	1.21669	0.441232	-0.0163666	-0.848796	-0.104347	0.131873
4	181563401	181770189	bA396I22	-0.176465	-0.298459	-0.40405	-0.0686378	-0.0321542	0.318091	-0.0599382	-0.441018
4	182373159	182525197	bA226A18	-0.00913026	-0.159369	-0.413133	0.134896	-0.0994788	-0.084966	-0.0804074	-0.420457
4	182860949	182899360	bA62B7	0.314552	-0.196072	0.249943	0.244094	0.40408	0.616653	0.152193	-0.139517
4	183769213	183945564	bA432I21	-0.488406	-0.0694846	0.0926304	-0.811554	-0.279871	-0.873483	-0.00441721	0.35674
4	184371085	184542576	bA59I16	0.74919	0.132891	1.25468	0.926868	0.440074	0.722709	0.0452288	0.266101
4	184713296	184909339	bA451F20	0.381779	-0.0589107	-0.125067	-0.530174	-0.182264	-0.0364324	0.0912928	0.212811
4	186219769	186373152	bA228F3	-0.452469	0.340837	-0.505078	-0.253674	-0.174572	0.195715	-0.179472	0.377062
4	187000034	187169847	bA301L8	-0.385586	-0.126317	0.455695	-0.143168	-0.0576346	-0.017459	0.0435202	-0.0430471
4	187517482	187640772	bA279K24	-0.132358	-0.0260123	-0.665768	-0.794791	-0.709052	-1.08909	-0.829244	-0.0532123
4	188869700	189024383	bA91J3	0.209204	-0.122139	-0.501787	-0.21089	-0.632095	0.35208	-0.271187	0.174339
4	190047964	190128399	bA347K3	0.994393	-0.0596629	1.03683	1.56082	0.29873	0.538116	0.195327	-0.0210868
4	190161001	190315008	bA553E4	0.411201	0.182188	0.530844	-0.051685	0.161007	-0.271583	0.163616	0.254194
4	190306286	190499377	bA354H17	-0.222749	-0.311363	-0.600644	-0.365518	-0.0927994	-0.330957	-0.642428	0.131954
4	190867466	191015883	bA45F23	-0.133423	0.104125	0.377172	-0.315564	-0.248052	0.0330846	-0.291628	-0.0546166
4	191632378	191732378	PAC963K6	-0.0365472	-0.158259	-0.72184	-1.1552	-0.0954657	-1.05144	-0.717593	-0.28238
5	1	100001	BAC114J18	-0.275495	0.0422177	0.0350019	-0.713826	0.0510334	-0.604297	-0.0486777	0.228328
5	2550421	2704738	bK2265D9	-0.0373144	0.302921	-1.01358	-1.23128	0.0887526	0.0588835	0.0277423	0.47335
5	3221653	3297048	bA20K9	0.00576465	-0.171544	0.0248422	-0.130132	0.18463	0.776933	-0.17296	0.0589925
5	3405732	3576991	bA121L11	0.175144	0.171483	0.824169	0.0370198	0.284356	0.285786	-0.160971	-0.209739
5	5500139	5686966	bA137P5	-0.458871	-0.58509	-0.126322	-0.754069	-0.315071	0.498952	-0.241252	0.207965
5	5858867	5987829	bA245L6	-0.781259	-0.136187	-0.619953	-1.20536	-0.574167	-0.82459	-0.504527	0.103548
5	6328502	6409753	bK2324F15	-0.577809	-0.611151	-1.0604	-1.09945	-0.819106	-0.749458	-0.670889	-0.421944
5	6514876	6709623	bA114M17	-0.0296925	0.27029	-0.445426	-0.379184	-0.126734	0.10501	-0.567358	0.103909
5	7406496	7509923	bK2346M20	-0.226232	-0.140084	-0.658306	-1.14752	-0.591976	-0.142778	-0.537218	-0.336656
5	8398069	8523564	bA132J20	0.0498257	0.328422	-0.144368	-0.439578	-0.324327	-0.194205	-0.358721	-0.0286003
5	9419785	9573480	bA32D12	-0.665386	-0.373722	-2.5041	-1.55448	-0.786967	0.128128	-0.223856	-0.138796
5	10339525	10413036	bK2274H20	0.556266	-0.168396	-0.182705	0.0117711	-0.134431	-0.324987	-0.442219	-0.7419
5	10624443	10702632	bA215G15	-0.670646	0.322548	-0.569148	-0.596575	-0.505755	-1.14853	-0.114767	0.584861
5	10905271	11128678	dJ502L6	-0.595689	-0.134834	0.345809	-0.704123	-0.509148	-0.824757	-0.560497	-0.13088
5	12109753	12196173	bA44C2	0.375169	0.0780389	0.753038	0.310797	0.327799	0.198744	0.256238	0.152423
5	12150784	12242677	dJ64M18	0.0159882	-0.00246749	-0.865681	-0.403373	0.132378	-0.0379288	0.0740171	-0.153587
5	13169713	13257048	dJ61C2	-0.131653	-0.246037	-1.19524	-0.661356	-0.29208	-0.151471	0.0526036	-0.0560368
5	13236615	13325848	bA269G2	0.622506	-0.151129	-0.951251	0.656321	0.430457	-0.394731	0.513913	-0.144907
5	14454085	14628504	dJ29O12	NaN	0.0624147	NaN	0.182012	-0.226664	-0.246142	0.011462	-0.127879
5	14595841	14750772	bA415K6	-0.253159	0.460246	-0.0185963	-0.105111	-0.0242353	-0.215072	-0.0221994	0.476735
5	15171149	15295094	dJ137K24	-0.540069	-0.130512	-1.33144	-0.502193	0.0835561	NaN	0.10264	-0.403743
5	16173373	16338191	bA19O2	-0.141649	-0.596545	-1.60463	-0.541985	0.236351	-0.0487669	0.307444	-0.365293
5	16333825	16509001	dJ167G20	-0.679975	-0.487881	-1.98171	-1.01039	-0.129198	-0.330875	-0.414793	-0.372561
5	16603171	16755146	bA260E18	-0.150649	0.234544	-0.141077	-0.0787921	-0.0373936	-0.22269	0.0851372	0.23875
5	17124577	17257224	bA553J15	0.136618	0.187547	NaN	-1.65048	-0.6692	-1.8642	-0.424552	0.411599
5	17624941	17773068	bA556F3	0.645113	0.265479	-0.826225	-0.580362	-0.570778	-0.821637	-0.31448	0.121225
5	18287269	18327732	bA94E2	0.0581737	-0.0440605	-1.27889	-0.64767	0.0376627	-0.298679	0.180397	-0.24517
5	19642866	19781395	bA28P24	-0.17825	0.315347	-0.353919	-0.269323	-0.413417	-0.172396	-0.0550615	0.141341
5	20378760	20559409	bA414I19	0.109494	0.249769	0.234254	0.17152	0.122823	0.206334	-0.00975392	-0.400592
5	21573362	21757139	bA374E21	0.65533	0.172407	1.13093	1.11707	0.631585	0.914648	0.319661	0.0218764
5	22309858	22468875	bA26L18	0.745431	0.0378328	0.530178	0.799967	0.591739	0.903652	0.123467	-0.146216
5	23647225	23757204	bA57I6	-0.00302665	-0.0358611	-0.19897	0.277594	-0.100405	0.135333	0.128173	-0.0998367
5	25151226	25297012	bA192H6	-0.464533	-0.24408	-0.743894	-0.768101	-0.270205	-0.309718	-0.120726	-0.276358
5	26317269	26503730	bA351N6	-0.028803	-0.116374	0.306098	-0.0404619	0.261739	0.288382	0.134329	-0.199976
5	27276637	27350976	bA29E4	0.0171732	-0.0976777	0.0875585	0.0876843	0.358754	0.063125	0.0606657	-0.150449
5	27323797	27415860	bK2219P12	0.296185	0.180505	0.638557	0.586703	0.526368	0.721742	0.389525	-0.291382
5	27450982	27605795	bA46C20	0.146984	0.741072	-0.962402	0.160452	0.317015	0.289924	0.136851	-0.166172
5	28714921	28881838	bA37M16	-0.0812031	-0.116859	0.0656089	0.3496	0.428989	-0.130105	0.351086	-0.241314
5	30835609	30981204	bA22G4	-0.803617	-0.0463948	-0.161251	-0.775285	-0.949453	0.143266	-0.00758162	-0.391713
5	31326937	31504934	bA16A6	0.290682	-0.158826	-0.368603	0.487478	0.586378	0.358886	-0.0645408	0.0275735
5	32711245	32870556	bA53L13	-0.27346	0.0637091	NaN	-0.654993	-0.254246	-0.198758	0.0279529	0.0430671
5	33244603	33416346	bA15G6	0.306334	-0.0977529	-0.265283	-0.116977	0.127943	0.356114	0.0319634	-0.312701
5	34893374	35007123	bK2052F19	-0.653966	-0.413143	-1.16764	-0.564355	-0.392674	-0.736798	-0.320612	0.0101982
5	35352023	35477425	bK2291F22	-0.258458	0.112802	0.021179	0.108823	-0.159678	-0.398953	-0.228503	-0.192198
5	36275837	36380871	bK2267H19	0.773533	0.256435	1.28022	0.151892	-0.15149	-0.232095	0.285539	0.0758302
5	36988555	37177051	bA7M4	0.427912	0.187021	1.32825	0.795995	0.145773	0.442652	0.276621	0.116924
5	38164952	38270789	bK2007F2	-0.0788446	0.0357499	-0.661944	-0.245636	-0.214554	-0.0538888	-0.118359	-0.171368
5	39226026	39422569	bA15A14	0.114727	0.128803	-0.56698	-0.734969	-0.230871	0.167696	0.187416	0.173219
5	40077529	40245180	bA17J3	0.124623	0.119861	0.143917	0.390136	0.0658084	-0.10103	0.0821738	-0.125641
5	41730373	41793660	bA274J22	-0.00402155	-0.191433	0.349225	0.113352	0.367999	0.027411	0.252508	-0.255824
5	42956629	43094160	bA575G10	-0.0451442	0.405256	1.34728	0.224398	0.41111	-0.0280219	-0.0497189	0.270044
5	45570659	45708383	bA28I9	0.407516	0.104733	0.653314	0.58433	0.614061	0.634033	0.158509	-0.416293
5	49842543	50028707	bA269M20	0.126383	0.498885	0.893862	0.173628	0.146156	0.222938	0.173345	0.159143
5	49996250	50102938	bK2276O24	0.281803	-0.227976	-1.77729	-0.252593	0.327577	0.835133	0.195297	-0.543278
5	52855165	53000112	bA92M7	0.268447	-0.128125	-0.492405	0.109521	0.302434	0.188727	0.118055	-0.29095
5	53278021	53400696	bK2022G9	-0.235747	-0.487885	-0.298199	-0.376895	-0.205047	-0.0634436	-0.421849	-0.607765
5	54497449	54698852	bA506H20	-0.234111	0.219135	0.435389	0.07071	-0.128681	-0.281158	0.139665	0.280831
5	55432705	55522932	bA364C6	-0.502212	0.198782	-0.183158	-0.0907843	-0.403586	-0.609433	-0.123252	0.337012
5	55546666	55547446	bA412L4	0.0463544	-0.246867	-1.27193	-1.29249	-0.418553	-0.918248	-0.116596	0.312081
5	56856265	56999868	dJ572A3	0.674188	0.173788	-0.33501	0.483757	0.531151	0.61744	0.356928	-0.25536
5	57209857	57332988	bA402F5	-0.0619912	-0.446211	-0.870644	-0.0878594	-0.0697774	-0.00255185	-0.0899737	-0.101854
5	58137913	58215264	bA495K20	-0.524608	-0.0420842	-1.16008	-0.646452	-0.113232	NaN	-0.0916318	-0.122168
5	59340905	59341702	bA16B11	-0.0450105	-0.046865	-0.702103	-0.329379	-0.0785642	0.0731255	0.0936967	-0.113691
5	60019645	60119820	bA210O14	0.0756479	-0.0334	0.296506	0.343109	0.394172	0.432588	0.170282	0.0582902
5	60670229	60725807	bA313P15	0.0112928	-0.0290389	0.951788	-0.285179	-0.157524	0.463263	0.0836426	-0.0833607
5	61594341	61767657	bA34J15	-0.105924	-0.0590258	NaN	-0.00975364	0.302543	0.278327	0.0391094	-0.139316
5	61972340	62126611	bA432A10	-0.398866	0.130929	0.666689	0.345531	-0.038261	-0.0398833	0.0439017	0.0504681
5	63273925	63433944	bA18K15	0.524846	-0.174997	-0.253799	-0.119	-0.0427657	0.0808545	0.163147	-0.34611
5	64142336	64300795	bA19B7	-0.0138457	0.224507	-0.896851	-0.331472	-0.270583	0.0103171	0.127756	-0.0199109
5	64993918	65173886	bA480H11	0.133347	0.421421	1.56158	0.673324	-0.0544215	0.178116	0.0575492	0.43567
5	65325073	65362668	bK1536A23	0.417428	-0.0737096	0.570343	0.65317	0.442649	-0.845228	0.178982	-0.236841
5	67366897	67436472	bA494P23	-0.139442	-0.1788	0.00383105	-0.172756	-0.112456	-0.585952	-0.278511	-0.191962
5	68951749	70208388	bA497H16	0.0822484	-0.0395125	-0.757322	-0.0335799	0.239599	0.617129	0.140315	-0.573252
5	69051889	69873744	dJ215P15	0.0635374	0.188234	-0.0357517	0.161448	0.187687	0.117437	0.210481	-0.558464
5	69534774	69690022	bA551B22	0.226161	0.319992	0.45257	0.315055	0.10485	0.668772	0.0842231	-0.3617
5	71659788	71823446	bA115I6	-0.259828	0.232963	-2.15469	-1.72883	-1.07964	-0.415175	-0.359947	0.0951224
5	72797384	72923129	bK1533D18	-0.902041	-0.128991	-1.13612	-1.08995	-0.540096	-0.333877	-0.310649	-0.473352
5	73130989	73303392	bA399M5	-0.469952	-0.467697	-0.928269	-0.246684	0.0796216	-0.361673	-0.280963	0.0227161
5	73817310	73968588	bA97L2	-0.448037	-0.119914	-0.998851	-0.847149	-0.527943	-0.480385	-0.0346801	0.266493
5	73872906	73873453	bK347N9	0.0505161	0.187608	-0.296447	-0.135495	-0.019336	-0.0432529	-0.00765771	-0.138587
5	74850751	74973753	bK2174D2	-1.47892	-0.889042	-1.65888	-1.14304	-1.72113	-0.377511	-1.23519	-1.77638
5	75600638	75734191	bK2200O3	1.13052	0.815269	0.6387	1.88906	0.0216333	-0.0192996	0.559935	0.412733
5	77055529	77190852	bA21H5	0.827366	0.0482504	1.32302	1.12725	0.665702	1.14402	0.170355	0.0343579
5	77221801	77319984	bA2J21	0.571849	0.441632	1.08203	1.68719	-0.245302	-0.718988	1.10198	0.23095
5	79087062	79222495	bK1431G16	-0.0543716	-0.390786	-0.305896	-0.160626	0.301509	-0.107856	-0.232644	-1.30434
5	79172773	79351477	bA30D15	0.309365	-0.0497018	0.850239	0.517114	0.138908	0.281043	-0.140235	-0.268266
5	79941157	80082396	bA538B23	-1.02882	-0.304446	-1.93961	-1.4251	-0.951202	-0.358242	-0.413757	0.0789312
5	80066095	80219172	bA241J12	-0.179325	-0.143665	0.466495	-0.162029	-0.35516	-0.106597	-0.29536	-0.156276
5	81248938	81413463	bA356D23	-0.237218	-0.438108	-0.450492	-1.06009	-0.253153	-0.112482	-0.0661328	0.0765752
5	82386553	82505436	bA446C5	-0.434471	-0.246734	0.086369	-1.172	-0.679026	-1.35598	-0.300353	0.301549
5	82605877	82745844	bA463C5	NaN	0.113445	-0.0225204	0.24147	0.413902	-0.735646	0.197648	-0.197257
5	84863841	85043324	bK1480C2	0.116233	-0.235855	-0.227362	0.171948	0.255181	-0.953624	0.0818527	-0.106686
5	86343575	86475356	bA72L22	0.159967	0.196772	1.02676	0.197385	0.22724	0.244957	0.156268	0.0431921
5	87300464	87446926	bA3H15	0.32693	0.256264	0.441916	0.465527	0.310825	0.587002	0.341098	-0.104226
5	87673463	87714352	bA512I16	-0.328593	0.0466516	0.700065	0.64217	0.275602	0.468001	0.190254	-0.0976873
5	88149138	88309856	bA24O11	-0.566212	-0.122531	-1.41383	-0.705153	-0.222981	-0.33849	0.32415	-0.236288
5	89567617	89678424	bA302L17	-0.142388	0.137221	0.35962	-0.19575	-0.0878365	-0.141092	0.159227	-0.0991207
5	90837325	90915852	bA12D3	1.51891	0.34648	0.389048	1.29439	-0.366307	1.96787	0.862409	0.194806
5	92077699	92095122	bK2011L22	0.532899	-0.633731	-0.626157	0.281664	0.306217	-0.0551913	0.0529409	-0.465945
5	93132464	93176416	bA20O13	-0.0620428	-0.139387	0.208778	-0.139769	0.0114759	-1.06797	0.0145826	0.324715
5	93540085	93709247	bA39B14	1.07336	0.00969265	-0.761206	0.232433	0.805504	1.21884	0.581141	-0.514265
5	94540957	94616328	bK1366N20	0.531469	-0.0500108	-0.0294079	0.255562	0.522863	0.597746	0.309268	-0.448589
5	95850829	95981160	bA526D16	-1.03445	-0.0699165	-0.803634	-0.915355	-0.224008	-1.52473	-0.0696003	0.0257613
5	96944782	97113079	bA3G13	0.22772	-0.0736403	NaN	-0.115462	-0.00984655	0.515866	0.169462	-0.146084
5	97953649	98006952	bK1564E20	-1.70298	-1.01013	-2.20723	-2.876	-1.49198	-1.14703	-1.52992	-1.40263
5	98957041	99047124	bA195A20	1.02865	0.0959317	0.0645403	1.09695	0.840437	1.29022	0.202169	-0.344664
5	99853165	99998892	bK2068C11	0.59837	-0.36733	-1.0785	-0.00989211	0.153184	0.895612	-0.371538	-0.970168
5	100714436	100909804	bA418P19	-0.18839	0.159123	-0.0118116	0.930887	0.88055	0.971928	0.481815	-0.190997
5	100994036	101184883	bA560F8	0.125105	0.0380497	0.277694	0.112673	0.180641	0.189774	0.226292	-0.0565744
5	102294632	102451692	bK1425H14	-0.584902	-0.206327	-0.623125	-1.03712	-0.191681	-0.559154	-0.523886	-0.395664
5	102824473	102963696	bA172N20	0.271643	0.131464	0.323825	0.536935	0.298108	0.52916	0.125468	0.0469883
5	103070881	103183440	bA528K12	0.115656	0.302801	2.67209	0.226942	0.38694	0.566731	0.0960933	0.109974
5	104173321	104261928	bA275K4	0.342629	0.107766	0.377881	0.200094	0.292471	0.441763	0.0866013	-0.0485058
5	106801969	106876128	bA319P13	-0.472139	NaN	-1.09426	-0.892105	-0.485638	-0.657639	-0.166002	-0.126832
5	107349481	107505288	bA17L14	0.407225	0.210446	-0.250714	0.683733	0.401713	0.545827	0.317414	0.122735
5	108019071	108183012	bK1329H14	-1.02918	-0.12812	-1.79064	-1.18287	-0.894285	-1.28029	-0.245752	-0.0216438
5	109375981	109506072	bA276O18	-0.0504123	0.279191	-0.360742	-0.0333058	0.0641575	0.367641	0.165761	-0.349542
5	110064385	110182776	bK1534K6	0.138137	-0.0319895	0.540691	-0.0265606	0.256185	0.407116	0.268798	-0.367987
5	111995029	112165380	bA3B10	-1.04586	0.344755	0.58306	-0.802905	-1.13067	-1.20161	-0.215993	0.0861805
5	112074297	112242499	bK554D6	-0.206239	-0.237278	-1.85261	-0.71326	-0.134429	0.244783	0.183562	-0.246598
5	112491785	112698521	bA467F22	0.203648	0.217064	-0.109142	-0.336711	-0.618229	0.408677	-0.202117	0.10734
5	113300545	113368984	bA153B10	-0.139324	-0.309332	-0.725941	-0.73231	-0.175699	-0.235097	-0.115658	-0.0273989
5	114505873	114547716	bA115D4	0.37433	-0.0300439	0.896666	0.652528	0.0779247	0.567216	-0.28503	0.026237
5	115162657	115234476	bK1453E13	1.33437	1.83464	1.49302	2.44379	0.161952	-0.523116	1.32893	0.496699
5	115968963	116141251	bA249M12	-0.49444	0.0408557	-0.234444	-0.664485	-0.527103	NaN	-0.453221	0.150628
5	117310999	117482055	bA567A12	-0.20063	-0.0631457	-0.23462	-0.45821	-0.0847119	-0.0133639	-0.604981	-0.332896
5	118281529	118397160	bA321G16	-0.277743	-0.414748	-0.521656	-0.435054	-0.191871	-0.35845	-0.26609	-0.0684265
5	119004265	119110764	bK1461G12	0.297647	-0.119138	0.101283	0.188619	0.282204	0.208108	-0.291869	-0.50782
5	119668802	119831950	bA13K8	0.153195	-0.0510808	-0.013147	0.0262553	0.231964	0.411806	-0.146388	-0.120663
5	119959041	120137585	bA565F4	0.227802	0.0432585	0.0502676	-0.0283209	0.173817	0.173684	-0.399341	-0.183244
5	121124317	121192332	bA11P11	0.475814	-0.174791	-1.14346	-0.0778873	0.48076	0.526759	-0.41957	-0.564121
5	121344636	121559746	bK441N14	-0.138484	-0.28677	-0.085699	0.0159944	0.0331666	0.0862871	-0.294757	-0.261237
5	122463059	122626530	bA14L4	-0.234421	-0.0395184	-0.0439074	0.0952234	0.113086	0.283733	-0.172992	-0.180984
5	124243453	124292244	bA48C14	0.231739	0.0129658	1.02468	0.512649	0.521336	0.594374	-0.232465	0.267272
5	125169109	125341668	bA394D6	0.459673	7.58599e-05	0.0836437	0.266001	0.107591	0.380502	-0.359242	-0.565025
5	126048843	126235814	bA434D11	-0.0326343	0.769276	0.811768	0.110154	-0.11609	0.0487958	-0.0760242	0.49234
5	126651084	126868304	bK1054G2	-0.0288384	-0.353416	-1.88654	-0.207619	0.0275978	-0.853347	-0.5182	-0.924165
5	127600154	127762073	bK1352M6	-0.284183	0.144923	0.37058	0.0546385	-0.0416756	-0.156691	-0.350541	0.175233
5	128356886	128457872	dJ117N3	-0.609975	0.167193	-0.503234	-0.779506	-0.352338	-0.856121	-0.364315	0.265853
5	129285673	159233112	dJ179P12	0.771321	-0.220094	0.600893	0.800766	0.538321	1.20726	-0.313563	-0.405736
5	129571490	129602955	dJ236L2	0.289775	-0.026551	0.0577523	0.0304839	-0.507212	0.302103	-0.183032	-0.315004
5	130309709	130415495	bA114H7	0.341017	-0.133937	NaN	0.539724	0.343338	0.553411	-0.0991917	-0.125372
5	130619557	130660776	dJ247F3	-0.589729	0.432206	0.0168628	-0.355749	-0.494062	-0.601851	-0.569867	0.396308
5	131039749	131076696	dJ66P19	-0.597229	0.240993	-0.571723	-0.508674	-0.459094	-0.869237	-0.280603	0.170902
5	131382877	131531472	dJ241C15	-0.031492	-0.0117099	0.00891633	-0.00108646	0.218791	0.112449	-0.0634637	-0.162269
5	131645101	131734274	bK1104P14	-1.95971	-0.529061	-1.41968	-2.97641	-1.56046	0.566558	-1.02057	-0.832597
5	131819965	131961624	bA729C24	1.08359	1.40879	1.07654	1.69754	0.134209	-0.50168	1.38416	0.727291
5	132509104	132707513	bK1049A3	-1.00407	-0.31833	-0.921684	-2.08185	-0.848194	0.282523	-0.381888	-0.450756
5	134413705	134475840	bK1184C17	-0.354342	-0.494151	-0.615951	-0.771738	-0.0390445	-0.301979	-0.695579	-0.396969
5	135552726	135741273	bK1028J9	-0.2726	-0.341599	-0.78359	-0.521159	-0.322703	-0.588173	-0.144647	-0.293729
5	135742954	135902806	bA114H21	0.0289194	0.0357743	0.5406	-0.34981	-0.0397802	0.288759	-0.0257455	-0.00237707
5	136379809	136478088	dJ244J5	0.111023	0.0978809	1.84469	0.193756	0.110478	-0.187148	-0.101429	0.044431
5	136941277	137016252	dJ186K10	0.045396	0.0390158	0.501876	0.194678	-0.161458	-0.247838	-0.0775643	0.153712
5	137638222	137739845	bA256P1	-0.50337	0.239526	-0.0126675	-0.465556	-0.270885	-0.686698	-0.100375	0.31079
5	137715529	137836260	dJ98O22	-0.391333	0.155925	-0.600506	-0.82728	-0.271186	-0.808993	-0.267552	0.445093
5	138233377	138417917	bK1046B19	0.067855	0.0101903	-1.1131	-0.0753283	-0.243191	-0.333825	0.0260354	0.308594
5	139532286	139666240	bK1133C10	-0.296532	-0.109079	-1.96205	-0.222949	-0.315443	-0.790286	-0.255962	-0.0823326
5	139907024	140127558	bA515C16	-0.259044	0.656766	0.395356	-0.00305637	0.0766948	-0.557044	0.137848	0.289641
5	141051109	141190704	bK2323H12	-0.938703	-0.607059	-1.8963	-1.44128	-0.645885	-0.811595	-0.676734	-0.210958
5	141865861	141991536	bK2332G20	-0.710819	0.0123587	-0.363363	-0.531317	-0.236753	-0.710148	-0.0788121	0.468461
5	142559617	142738860	bK2185H17	-0.666731	-0.345332	0.583972	-1.09653	-0.472977	-0.185018	-0.714272	-0.724402
5	143325169	143466960	bA226O9	0.116629	0.0203373	-0.533278	-0.237917	0.247243	0.0044111	0.183796	-0.0241534
5	144619777	144757284	bA25F13	0.169881	0.647268	-0.258217	-0.504233	0.284095	NaN	0.230207	-0.164287
5	145154935	145350821	bK1370H24	-0.616233	0.0610358	-0.685914	-0.402573	-0.299319	-0.459705	0.00169682	-0.247127
5	146326717	146439780	bA481E16	-0.186932	0.11088	NaN	-0.141088	-0.608405	-0.497132	-0.0886551	0.00843225
5	146975509	147092653	bK1107A22	0.220283	-0.383758	-0.52761	0.211222	0.209468	-0.174923	-0.00118395	-0.0972348
5	147872964	147929136	bK1176I15	0.0329959	-0.0140351	-0.319582	-0.0541347	-0.0411876	0.34641	-0.118245	-0.155413
5	148058802	148191843	bK354F19	NaN	0.562971	0.926307	-0.125873	-0.0223707	0.242346	0.0541865	-0.0262881
5	148645190	148824822	bA394O4	-1.22321	NaN	NaN	-1.66942	-0.47587	-1.33963	-0.386373	0.372031
5	149177455	149352955	bK1307M15	-0.574839	-0.289234	-1.27361	-0.604634	-0.31255	-0.73485	-0.359704	-0.305766
5	149407439	149494253	bK13H5	0.298208	0.343103	0.251898	0.648646	0.270897	-0.33595	0.192874	0.863146
5	149981521	150045564	bK1137O22	-0.784223	-0.402575	-1.57854	-1.74654	-0.746813	-0.467541	-0.880491	-0.284644
5	151322917	151491420	bK1209K13	0.337657	-0.192819	-0.440955	0.168423	-0.598466	0.45506	0.0696308	-0.320092
5	152539670	152728895	bA26B2	0.147473	-0.209499	-0.812443	0.202596	0.215234	0.250945	0.202357	-0.259749
5	152820225	152988130	bA494C5	-0.145156	-0.0679335	-0.167012	-0.24507	-0.347724	0.168146	-0.170681	-0.14666
5	154420717	154524576	bK1263A14	0.330355	-0.314993	0.0336188	0.282126	-0.00136089	0.53771	0.0823562	-0.0385526
5	154485154	154603032	bA265I24	-0.223862	-0.156964	1.04055	-0.386686	-0.36269	0.135758	-0.123433	-0.22474
5	155565514	155627795	bK1003C20	-0.52116	-0.478286	-1.41918	-0.728898	-0.181114	-0.460048	-0.159419	-1.24757
5	156429913	156484287	bK1120L21	-0.156728	-0.0893127	-0.294505	-0.286965	-0.417041	-0.408607	-0.40705	-0.0272312
5	157180096	157349365	bA102A1	0.170539	0.301946	-0.92728	-0.622815	-0.651538	0.236382	-0.147997	0.543558
5	157458733	157539396	bA391B7	-0.101703	0.199258	-0.330036	-0.250399	-0.0713502	0.222085	-0.146393	0.0173715
5	159198172	159281832	bK1279E3	-0.467841	0.0164824	-1.42625	-0.878216	-0.587154	-0.608262	-0.610748	-0.328034
5	160284073	160397196	bA173E19	-0.190128	-0.0395227	-1.09539	-0.727336	0.0678153	0.0797352	0.164008	-0.243257
5	162174637	162268728	bA505G12	0.171021	-0.127819	3.23302	2.11129	0.769035	0.318109	0.525409	-0.0128791
5	163120562	163290777	bK1320C6	-0.191085	NaN	NaN	-0.309768	0.0796968	0.196592	0.0290137	-0.0211981
5	163628065	163787016	bA20F20	-0.256665	-0.104741	-0.102928	0.026543	1.07917	1.41096	0.0381505	-0.165683
5	163628065	163787016	bA20F20	0.115942	-0.25632	-0.222465	-0.0943161	1.07917	-0.159827	-0.0620007	0.401587
5	163628065	163787016	bA20F20	-0.256665	-0.104741	-0.102928	0.026543	-0.320018	1.41096	0.0381505	-0.165683
5	165677723	165841050	bA170P5	0.363567	0.0178909	0.978188	0.760503	-0.0375434	0.253844	-0.0831327	-0.0898712
5	165784558	165928437	bA511M9	0.256732	-0.0676019	0.549762	0.259017	-0.029338	0.314337	0.0119516	0.0192523
5	166552918	166650604	bK1180C19	0.348392	-0.329163	-0.647543	0.0587544	-0.662925	0.452882	0.056566	-0.678942
5	167595415	167810564	bK1055A14	-0.279715	-0.485208	-1.29566	-0.657177	-0.222763	0.0467555	-0.86465	-0.396353
5	167899561	168081276	bA397D2	-0.272702	-0.0552929	-0.667175	-0.280123	-0.691775	-0.28385	0.0799861	-0.0324624
5	168413965	168502524	bA185E13	0.139392	-0.0703828	NaN	-0.387836	0.123117	0.139651	0.000958737	-0.370004
5	169018045	169142472	bA420L4	-0.567286	-0.0599732	-0.193657	-0.505621	-0.679164	-0.922816	-0.392947	-1.01128
5	169615249	169734372	bA292M11	0.337415	0.0990352	0.290788	0.322703	0.0210014	0.117392	0.533442	-0.415978
5	170999345	171116697	bA20O22	-0.920747	0.482423	0.60848	-1.02225	-0.729664	-0.653435	-0.63548	0.319837
5	171717348	171958304	bK1054I1	0.0140836	2.02323	0.191898	0.419897	-0.387476	-0.754812	0.595834	0.176507
5	173154217	173285700	bA321F20	1.16319	0.168829	-0.157971	-0.0999377	-0.153518	1.66727	0.0419292	-0.476773
5	173819653	173913132	bA489P1	-0.129108	0.237689	0.604173	-0.0595691	-0.206977	0.0522681	-0.203078	0.14402
5	174477341	174646689	bK1073D21	0.356784	-0.246145	-0.804677	0.145866	-0.134827	-0.18168	0.086671	-0.150877
5	175142813	175269394	bK1355H1	-0.362698	-0.258169	-0.731023	-0.375615	-0.287343	-0.777726	-0.435444	-0.0283451
5	175838932	175912098	bK1087L24	-1.49831	-0.539078	-1.47184	-1.82902	-0.364513	-1.00456	-0.480496	-0.339787
5	176391379	176542031	bK286C20	0.884028	1.1578	NaN	1.71435	0.185375	-0.329262	1.40863	0.495154
5	176822533	176961756	bA564G9	-0.339861	0.442619	0.368963	-0.00581859	-0.0384981	-0.59128	-0.476834	0.327988
5	177990241	178067244	bA520O10	-0.654043	-0.461858	-0.67293	-0.707045	-0.261409	-0.666976	-0.426788	0.300247
5	178379242	178591216	bA281O15	-0.36802	0.222592	-0.31981	-0.18182	-0.477654	-1.05384	-0.22636	0.612874
5	180001836	180191859	bA451H23	0.0544775	-0.203982	-0.294784	-0.649952	-0.175617	-0.642597	-0.378929	0.207071
5	180721400	180821400	PAC240G13	0.042122	-0.143838	0.442113	-0.398949	0.257616	0.179695	-0.173309	0.0612675
6	300000	400000	PAC62I11	-0.269993	0.170471	-0.329427	-0.30135	-0.201597	-0.550248	-0.332659	0.297772
6	1285996	1348756	bA13J16	-0.110578	0.155978	0.223736	0.0090123	-0.120996	-0.304887	0.0699612	0.22767
6	2206673	2310155	dJ283K11	-0.40562	0.0300698	1.1089	1.05575	0.0755333	0.44998	0.0395763	0.233809
6	2361509	2458122	dJ136B1	-0.0179415	-0.105939	-1.26132	0.595507	0.301605	-0.0231369	0.103183	-0.145174
6	3337049	3472043	bA15N12	-0.293948	0.261933	0.108912	0.149454	0.0553901	-0.107581	-0.116653	0.383143
6	3370213	3442128	dJ34F7	0.0595004	0.415121	0.727901	-0.366407	0.32249	-0.190869	-0.0387287	0.462254
6	5196674	5215849	bA174B19	0.243787	-0.0245543	0.430575	0.610079	-0.0188441	0.804979	-0.056295	0.270849
6	6196264	6214479	bA232H4	0.0288483	-0.212314	0.223595	0.0795911	-0.0585105	0.163956	0.00807192	0.023697
6	6217514	6382300	bA163I22	-0.0878149	0.0690667	0.778281	0.77293	0.350298	-0.0914862	0.276386	-0.231307
6	6750338	6815147	bA320C15	0.0551542	0.329098	-0.709378	-0.407354	-0.238731	-0.744265	-0.296998	0.396056
6	7472269	7620672	dJ336K20	-0.533128	0.426606	0.107087	0.482284	0.0884725	-0.361551	-0.0042932	0.769142
6	8643346	8644694	bA385L2	0.396797	0.177291	0.694406	0.992162	-0.0704201	0.614397	0.0592886	0.247586
6	9588710	9687744	dJ90O12	-0.082832	0.273483	0.725787	0.281354	0.250622	-0.468724	0.0677983	0.243368
6	10551797	10639432	bA360O19	-0.440383	0.43303	1.22345	-0.0916759	-0.163854	-0.630188	-0.00853827	0.640633
6	11306733	11437485	dJ510L9	-1.30915	0.34775	0.804371	0.488755	1.12148	0.0373939	0.227458	0.314202
6	12385304	12403605	bA97A19	-0.265245	0.381225	1.6698	-0.124301	-0.188443	0.856208	0.130221	0.436826
6	13239892	13367808	dJ257A7	0.6473	-0.189669	-1.24572	0.635075	0.50887	1.06588	0.65703	1.09162
6	14490663	14628392	dJ365E2	NaN	0.0667559	1.05273	0.663223	0.558021	0.653944	0.30327	0.0314414
6	15387131	15585291	dJ232K4	-0.35359	0.0715834	-0.651974	-0.133466	0.203905	0.154409	0.120941	0.365286
6	16120141	16273287	dJ13D10	-0.267412	0.688932	0.97117	0.908729	0.665358	0.974775	0.605517	0.867892
6	17042509	17143968	bA496I9	-0.106418	-0.379146	-0.357539	-0.0272811	-0.0350758	0.124096	-0.354247	-0.375577
6	17690131	17760173	bA68J15	-0.140801	0.128592	0.957605	0.459185	0.0593397	-0.191034	0.0429209	0.675315
6	18892364	19034119	bA408C8	-0.62839	-0.0419404	0.591991	0.509732	0.197583	-0.798987	0.292111	-0.130916
6	19787781	19973151	dJ625H18	0.436119	0.182858	1.23321	0.668937	0.658964	0.905652	0.538356	0.271943
6	20101886	20272058	bA86O17	0.413503	-0.310802	-0.852201	-0.083622	-0.253796	0.336146	-0.418639	-0.53983
6	20585354	20713623	dJ444C7	0.621567	0.0816832	1.55467	1.15713	0.541251	0.668408	0.242826	0.177462
6	21498101	21649072	bA204E9	-0.342622	-0.116701	-0.232903	-0.667294	-0.233347	-0.893343	-0.405521	0.440889
6	22534961	22620748	bA33I5	0.590232	-0.0988729	1.87297	0.778353	0.373711	1.04796	0.408142	-0.0377893
6	23453934	23488607	bA289M23	0.275265	0.0647629	1.48098	1.12504	-0.182691	0.546236	0.0700445	-0.0975405
6	24209172	24222261	bA176J5	0.162909	0.432645	0.437301	0.298392	-0.0603937	-0.263956	0.143232	0.472167
6	25449152	25584865	bA289G11	0.167062	-0.0103228	0.899594	0.396406	-0.0814974	-0.210657	0.121315	0.0980716
6	26257386	26346686	dJ34B20	-0.246014	0.884982	-0.135925	0.241289	0.204159	-0.814907	0.161799	0.779036
6	27107014	27196029	dJ86C11	-0.014253	0.398882	0.886064	0.155325	0.206293	-0.224123	0.1472	0.735968
6	27399056	27481511	dJ153G14	0.525107	0.247005	0.0805593	0.1433	0.329037	0.341379	0.250059	0.390284
6	28141718	28197197	dJ265C24	-0.154757	NaN	0.479462	0.295243	-0.106427	-0.298764	-0.00948587	0.373581
6	28635830	28721781	bA373N24	-0.129108	0.052081	1.01527	0.0762976	-0.267901	-0.160959	0.0428626	0.169736
6	29321776	29419167	bA150A6	0.182747	0.142432	0.912956	0.321135	0.240341	0.459543	0.195734	0.0852633
6	32322222	32397556	dJ1077I5	0.0596925	-0.325814	-0.686959	-0.298714	-0.260937	-0.177695	-0.207422	0.238965
6	32541512	32628407	dJ93N13	-0.200111	0.112149	-0.545213	-0.0552699	-0.358064	NaN	-0.130764	0.519806
6	33414759	33461862	bA175A4	0.403445	-0.290328	0.169935	-0.38039	0.385243	-0.25847	-0.128855	0.260229
6	33769697	33906582	dJ468B3	-0.124614	0.637021	0.844341	-0.0516759	0.486207	-0.426908	0.247176	0.778732
6	34811964	34944911	dJ349A12	-0.508561	-0.25058	-0.276119	-0.553045	-0.46503	-0.537278	-0.171701	0.287982
6	36644694	36840057	dJ431A14	-0.0981417	0.328176	0.774451	-0.316654	-0.003868	-0.365226	0.0573479	0.761269
6	36838057	36971210	dJ90K10	0.387505	0.947667	0.377469	0.458589	0.763564	-0.13115	0.762643	1.04161
6	37782729	37903063	dJ441A12	0.622383	1.03953	1.93426	0.758355	1.11119	-0.23779	0.968284	1.12559
6	38915617	38972125	dJ350J21	-0.316702	0.119518	0.466023	0.354932	0.016609	0.080308	0.10011	0.351775
6	39870601	39970079	dJ278E11	0.727578	0.0979462	0.606063	0.386712	0.194936	0.238856	0.0934397	0.240295
6	40753750	40923646	bA162O6	0.577002	-0.133171	1.12569	0.500623	0.279346	0.634739	0.147483	0.343929
6	41919987	42025065	bA533O20	-0.137866	0.81307	1.62762	-0.179892	0.572931	-0.281221	0.0278861	0.85432
6	42709208	42807547	bA501I18	-0.141737	0.687697	0.402341	-0.114141	0.297367	-0.438778	0.20533	0.771273
6	43859345	43944316	bA227E22	-0.158956	-0.0220403	-0.466581	-0.197755	1.07803	-0.445028	-0.38861	0.10148
6	44881206	45058173	bA554O14	2.83777	0.264417	1.21251	0.650098	0.55095	0.672857	0.307141	0.0579486
6	45670805	45853786	bA546O15	0.345722	0.247756	3.38618	0.505144	0.120571	0.0123986	0.00199058	0.350165
6	46811832	46929467	dJ365O12	0.0683576	0.162324	1.04929	0.360483	0.0559045	0.0764143	0.142068	0.136454
6	47763876	47895842	dJ402H5	1.78247	NaN	NaN	2.99966	1.12893	-0.416521	0.585765	-0.209146
6	48718029	48849487	bA334H12	-0.121055	0.100812	0.373221	0.190245	-0.0658805	-0.333475	0.152503	0.101088
6	49580228	49698751	dJ442L6	0.754447	0.248106	-0.0353555	1.39655	0.771929	0.129816	0.542726	0.0345263
6	50669138	50800810	dJ336H9	-0.168073	0.107382	1.41452	0.134516	-0.0817161	-0.0617828	0.171227	-0.0012824
6	51302164	51366011	bA529A21	1.97206	0.292109	0.376554	1.96004	0.977065	2.2438	0.457439	-0.0875304
6	52214312	52259087	bA255M9	0.346038	NaN	0.748556	0.726894	0.22144	0.280551	0.0802262	0.19209
6	52889365	52981922	dJ341E18	-0.150024	0.481617	-0.644934	0.189749	-0.0486863	-0.0562319	0.0379128	0.631242
6	53997390	54024335	bA362K18	1.55668	0.329478	2.1606	1.78471	1.26899	2.33604	0.694539	-0.132603
6	54636793	54749867	bA524H19	-0.288896	0.485628	2.7914	2.66561	0.677895	-0.606402	0.964124	0.74416
6	56640812	56798729	bA472M19	0.0277793	0.338733	0.7158	0.706013	0.0818986	0.0456379	0.1692	0.370701
6	57185937	57315565	dJ422B11	0.232579	0.21562	0.788144	0.436919	0.0408976	0.326606	0.315084	0.102096
6	58503657	58682040	bA199A24	0.279433	-0.0931778	0.556577	0.400877	0.229798	0.477349	0.16307	-0.261466
6	62532439	62618736	bA506N21	0.577933	0.202366	0.384191	1.10584	-0.063402	0.721281	0.234383	-0.0236828
6	63658018	63768918	bA767J14	-0.299909	0.0292844	-1.03612	-0.52224	-0.710589	-0.532867	-0.12812	0.150876
6	65051885	65102216	bA349P19	0.70429	0.0196246	0.877146	0.701657	0.418146	0.745864	0.492712	-0.247369
6	65733409	65755853	dJ40C9	0.863339	0.0476834	1.6884	1.48932	0.289369	0.112573	0.465515	-0.00386106
6	66794499	66915033	dJ324B8	0.341232	0.257377	0.63449	1.66779	0.31351	1.68499	0.516792	0.386144
6	68106599	68212255	bA409K15	-0.575576	0.261653	1.28882	0.731815	0.138665	-0.748896	0.383574	0.120194
6	69332126	69490329	dJ46B1	1.19112	0.167308	0.500502	1.79548	0.58673	-0.0963813	0.594128	0.145544
6	69831418	69900939	dJ160B9	-0.182541	-0.11076	1.22044	1.12504	0.0298025	0.901913	0.297949	-0.113451
6	71014829	71077155	bA462G2	-1.03426	-0.449367	-0.0525949	-0.122321	-0.372132	-1.59963	0.054951	0.240214
6	72053262	72062440	bA111D8	0.226234	0.378749	0.838183	0.559297	-0.350462	-0.159982	0.202308	0.178212
6	73074261	73110987	bA256L9	0.356671	-0.0193173	0.533081	0.590073	0.209978	0.653166	0.318308	-0.273507
6	75841277	75966917	dJ234P15	0.370929	0.250524	0.465346	0.611561	0.0144359	0.483662	0.258492	0.250811
6	76493448	76578642	dJ472A9	0.758111	NaN	1.94678	1.69197	0.71211	-0.930732	0.620844	0.296661
6	137125681	137125874	bA448D5	0.223303	0.406826	1.45787	0.842013	0.489331	0.43467	0.159505	0.294343
6	137856012	137971235	bA95M15	-0.382365	0.423451	0.945235	-0.3338	-0.702536	-0.445549	-0.171632	0.30154
6	139869552	140025231	bA15H7	-0.0384251	0.10887	1.42993	1.09035	0.238413	-0.201687	0.358461	0.342278
6	141017971	141120522	dJ460G2	-0.752238	-0.184536	-0.874905	-0.346135	-0.0720617	0.910315	0.0433657	-0.664956
6	142115804	142254889	bA368P1	-0.52017	0.107225	0.207947	0.128071	0.126819	0.0816759	-0.251766	-0.131987
6	143394841	143515869	bA86O4	0.769503	0.283965	1.96367	1.44055	0.089602	0.765835	-0.114693	0.623904
6	144402919	144407695	bA3B11	-0.311506	-0.102672	0.207421	0.181386	-0.412845	0.414868	-0.0231079	0.399745
6	144983219	145064679	bA386H19	-0.27478	0.067498	-0.383721	-0.0188093	-0.489058	-0.555893	-0.41865	0.244081
6	146051333	146159631	bA545I5	0.536337	0.307357	2.12244	0.82967	-0.0110268	-0.0525546	0.0077771	-0.00135786
6	148319495	148503429	bA631F7	0.349522	0.231851	0.242646	0.268219	-0.00412762	0.0406742	-0.0735654	0.297039
6	149439017	149567346	dJ111D6	-0.267356	0.713401	0.0812464	0.541959	-0.425596	-0.886926	-0.0774177	0.408842
6	150453173	150560276	dJ1179L24	-0.428743	0.131054	-0.27402	-0.243162	-0.603114	-0.621055	-0.296465	0.25264
6	151409871	151475452	dJ297M16	0.381276	0.558299	0.515587	-0.0668012	0.0389187	-0.504513	0.00532712	0.781721
6	152034568	152101913	dJ443C4	-0.195715	-0.110075	0.373687	-0.335281	0.026078	-0.0986821	-0.251541	-0.0894761
6	152099914	152239600	bA450E24	0.447764	-0.329337	-1.2318	0.241391	0.0683273	-1.2618	-0.275181	-0.409847
6	152237601	152325305	dJ63I5	0.466196	0.178396	0.887607	0.524245	0.138775	-0.747111	0.120919	-0.073394
6	152325206	152434098	dJ130E4	0.297618	-0.164461	1.32994	-0.357128	-0.497913	0.319743	-0.37022	-0.00731767
6	153018423	153044851	dJ546K19	1.03565	-0.324967	1.69871	1.62044	0.225687	1.39387	0.43501	0.014546
6	153956345	154070948	bA495B4	0.755083	0.133854	0.864658	1.01717	0.0897782	-0.715841	-0.098609	-0.0675784
6	155203172	155295631	dJ66H9	-0.266663	0.475656	1.50707	0.469192	-0.0194412	-0.00697259	0.179123	0.89589
6	155875250	156036140	bA100E6	0.332934	0.181948	0.198376	0.700287	0.0366632	0.591032	-0.0777598	0.0579289
6	156799205	156901486	dJ336G18	0.01865	0.274702	0.0578484	0.630636	0.062919	0.467038	0.327844	0.525393
6	158193242	158354215	bA266C7	0.418933	0.451141	NaN	0.0557755	0.0790985	-0.236466	-0.0519305	0.42238
6	158731402	158767851	dJ442A17	-0.0397087	0.652999	2.0268	0.301316	-0.0133605	1.10788	0.131266	0.905545
6	159327147	159433573	bA13P5	-0.57067	0.249157	0.536455	0.853006	-0.321816	-0.315256	-0.114017	0.804076
6	160137579	160267546	dJ249F5	-0.203635	0.408042	0.432432	-0.0930424	-0.108974	-0.15923	0.0429964	0.435095
6	160532758	160615676	dJ366M24	0.213284	-0.320892	1.2858	-0.170511	0.0577832	0.194304	0.0802284	0.745299
6	161363961	161540177	dJ473J16	-0.748792	0.373875	0.907701	-0.381237	-0.0553584	NaN	-0.141987	0.731818
6	161716940	161872652	bA30F7	0.43634	-0.0296024	-0.667673	0.608836	0.3574	0.630886	0.294749	-0.0672856
6	162601194	162717177	dJ292F10	-0.558517	0.124123	0.86557	-0.0170576	-0.134866	-0.217879	-0.130626	0.398961
6	163269316	163390303	dJ257A15	-0.473207	1.76158	-0.0719454	-0.297062	-0.498517	-0.679958	-0.580516	0.122966
6	164210067	164252237	dJ471D13	0.608753	0.254059	NaN	0.759231	0.297805	1.17765	0.276879	0.381893
6	164974796	165158137	bA300M24	0.276004	0.056877	1.09049	0.400241	-0.330316	0.291146	-0.0990895	-0.129409
6	167729364	167774001	bA351J23	-0.171596	0.275416	0.714484	-0.136709	-0.165766	-0.194139	-0.219066	0.460381
6	167972806	168060585	dJ470B24	0.542788	0.264734	-0.0193836	1.56117	0.00399293	-0.323918	0.325028	0.608632
6	169321765	169409667	dJ137D17	0.234837	3.7402	NaN	2.79424	4.50011	0.0134581	3.15108	0.656501
6	170029517	170129517	PAC57H24	-0.490154	0.034684	-0.0605999	-0.922471	-0.658615	-0.634643	-0.455372	-0.0141305
6	170206746	170257324	dJ1086L22	0.0818519	0.362105	0.681701	-0.301525	0.0898023	0.0841173	-0.129011	0.505265
7	255000	355000	PAC164D18	-0.00249347	0.539439	0.383958	-0.0907697	0.274172	-0.15606	-0.228118	0.468602
7	628915	825118	bA449P15	-0.178472	-0.229148	0.147385	-0.543625	-0.23384	-0.0585712	-0.292708	-0.160442
7	1355640	1551421	bA510K8	0.217048	-1.00343	0.688939	-1.22602	-0.18553	-0.317903	-0.753296	-0.683239
7	2114370	2263766	dJ607J2	-0.430291	-0.601655	-1.95052	-1.12019	-0.444407	-0.120116	-0.716254	-0.640646
7	2351202	2400949	bA106E3	-0.250269	0.104824	-0.731498	-0.358303	-0.733882	-0.163431	-1.3778	-0.69906
7	3270368	3357414	bA348A21	0.706164	0.260179	0.753884	0.539007	0.48333	0.770722	-0.0251696	0.339042
7	5448528	5590890	bA172O13	-0.656263	0.326959	-1.08345	-0.925117	-0.381663	-0.596538	-0.678472	-0.0506192
7	5713512	5793521	dJ42M2	-0.655135	-0.0764397	-0.829904	-0.757715	-0.239355	-0.876582	-0.482271	-0.0117939
7	5793322	5946248	dJ810E6	-0.660092	-1.21404	-0.434786	-1.20384	-0.461269	-0.921059	-0.854792	-1.08803
7	5977799	6190625	bA425P5	-0.219631	0.204393	0.469129	0.272695	0.294373	0.0781744	0.325631	0.334071
7	6920248	7036201	dJ733B9	0.318469	0.0752072	0.121163	-0.382323	0.21456	0.0495362	0.106148	0.100775
7	7691571	7869931	bA505D17	1.0069	0.283421	1.04941	0.540668	0.218176	2.03352	0.191508	0.436911
7	8694324	8784185	bA304A10	NaN	0.0939022	-0.42849	0.122681	0.42416	0.468703	0.26644	-0.445468
7	9668703	9808651	dJ959C21	-0.185244	0.290596	-1.40255	-0.052679	-0.300495	-0.257707	0.170825	0.155702
7	9808452	9895774	bA352E12	0.445513	0.130141	1.06082	0.706724	0.828709	0.482836	0.331507	0.0772412
7	10116185	10173591	bA392P1	0.0236987	-0.383	-0.0129348	0.288495	0.311517	0.106135	0.0355385	0.119355
7	10648774	10744118	dJ855F16	-0.456376	-0.480139	-0.261835	-0.440473	-0.363187	-0.453188	-0.606952	0.0138713
7	11526180	11684519	bA502P9	-0.80409	0.0642367	-0.518959	0.0616235	0.64392	-1.19465	0.140799	-0.0431999
7	12469386	12571393	dJ1100A7	0.363089	0.166678	-0.13566	0.0513546	0.0271436	-0.134361	0.0904264	0.217834
7	12695164	12821554	bA195L14	-0.0938337	-0.414581	0.143376	0.0549154	0.339459	0.101589	-0.0747045	0.115561
7	13630875	13740233	dJ685A2	0.588801	0.424621	1.89604	0.529946	0.687717	0.89788	0.0788803	0.523605
7	13871884	14023199	bA512E16	0.47617	0.254329	1.32875	0.846334	0.629953	0.900309	0.365221	0.227423
7	14607214	14800339	bA547G15	1.02394	0.334258	-0.574176	0.0899857	-0.131181	0.70049	0.213377	-0.408949
7	15767106	15949477	bA196O16	-0.129109	-0.0591982	-0.863769	-0.178908	-0.102476	-0.146621	0.00674097	0.00151426
7	16609059	16799730	bA403N12	0.0204667	0.31512	0.0409224	0.190314	-0.0744532	-0.608001	0.0306679	0.470139
7	16647853	16757112	dJ1194E14	-0.568905	0.26868	-1.1302	0.0847378	-0.376674	-0.594241	0.0108786	0.300641
7	17525118	17675031	bA323K15	-0.266892	0.298214	-0.976978	0.311995	0.824423	NaN	0.182909	-0.221
7	19150033	19324359	bA71F18	0.760266	0.290533	0.669678	0.56712	0.473008	0.824501	0.204272	0.137613
7	19785970	19894387	bA486P11	-0.218748	0.163844	-0.140182	-0.0173388	-0.0135511	0.308634	-0.0497172	-0.0871121
7	20627973	20696201	dJ701O19	-0.367647	0.0257783	0.105404	0.338567	0.66216	0.579431	0.253748	-0.452316
7	20917692	21001589	bA211J15	0.199232	-0.0855355	-0.0611568	0.0775012	0.18685	0.311881	-0.0945948	-0.0690931
7	21332025	21413033	bA445O1	0.571051	0.0769145	0.373864	0.530614	0.304218	0.819371	0.185939	0.249594
7	23456300	23546479	bA451F11	-0.354249	-0.00742817	0.0484996	0.345923	0.170141	0.209813	0.261044	0.276107
7	24253251	24263754	bA343P21	-0.304737	0.00284942	-1.46922	-0.560362	-0.473	-0.544198	0.136757	0.0822808
7	25566014	25667624	bA99O17	0.108061	0.263667	-1.23712	-0.21166	-0.252992	-0.00383278	0.273987	0.14628
7	26118789	26250545	dJ1066K24	0.236445	0.0732679	0.805926	0.482379	0.329748	-0.141873	-0.195629	0.683443
7	26507407	26655118	bA232C20	-1.17774	-0.222401	0.336691	-1.62865	-0.918523	-0.110871	-1.7435	-2.40812
7	27717918	27908759	dJ781A18	0.176651	0.16225	0.0809618	0.203602	0.111683	-1.219	-0.0611292	0.378368
7	28201516	28345393	dJ596O9	0.0549561	0.212133	0.0280422	-0.320054	-0.182801	-0.727609	-0.417771	0.570374
7	29209317	29366408	bA550A18	0.000171043	NaN	-0.122746	-0.0483114	-0.0180793	-0.123526	-0.0964018	0.2118
7	30017455	30024114	bA111I9	0.309882	0.000872713	-0.459509	0.159358	0.368857	0.501062	0.0474286	0.0765138
7	30362138	30489562	dJ1143H19	0.114901	0.148881	-0.286146	-0.0347002	0.364069	NaN	-0.172273	0.191833
7	31037457	31157885	bA463M14	-0.208687	0.0614246	-0.0389764	-0.609718	-0.246663	0.323475	0.206009	-0.228468
7	32016739	32201309	bA175P8	-0.336461	-0.304161	0.365362	0.396216	0.40304	0.731031	-0.246567	-0.348388
7	33460349	33638983	bA89N17	-0.238337	-0.0217197	-0.460357	-0.365709	-0.113319	-0.371672	-0.334235	0.322069
7	33885182	34034436	bA179B11	0.684665	0.0493595	-0.0687869	0.533028	0.64054	0.63482	0.119418	-0.0683343
7	34849692	35027276	bA41A3	0.652598	0.208229	0.698802	0.71028	0.465112	0.0271211	0.573474	-0.246398
7	35908704	36078050	bA155G7	-0.092954	0.608275	0.368542	-0.138106	-0.0423449	-0.524458	-0.108598	0.743123
7	37148374	37338026	bA302L6	0.365119	0.47441	NaN	0.300323	0.31016	-0.0359674	0.0842426	0.592014
7	37925483	38097298	bA121A8	0.336062	0.516026	1.44159	0.315984	0.173119	0.0846526	-0.0298424	0.229078
7	39236354	39354117	bA64I2	0.354988	0.257567	0.857996	0.301932	0.123485	-0.040273	0.0104298	0.823859
7	40181079	40367219	dJ1178G13	0.728705	0.301866	1.51928	1.0303	0.503052	0.761242	0.138705	0.487788
7	40949088	41085742	dJ612F12	-0.746847	0.0846765	-1.8222	-1.24874	-0.717211	-1.35674	-0.463956	0.782701
7	42387890	42547587	bA100C21	0.363362	0.0467104	-0.438327	0.403336	0.473181	0.548274	0.0160054	0.46917
7	42890418	42968937	dJ1032B10	-0.189577	-0.0552329	0.986291	-0.475726	0.297475	-0.737993	-0.304158	0.874942
7	43193350	43335126	bA36H20	-0.490128	-0.150823	-0.720927	-0.39084	-0.654958	-0.575251	-0.233979	1.05954
7	43711579	43763571	dJ1022I14	-0.52849	-0.00548344	-1.51641	-0.367166	0.113418	-0.524901	0.178464	0.92197
7	44335383	44359692	bA52M17	-0.143401	0.0274599	-0.59474	-0.832171	-0.180398	-0.36074	-0.641966	-0.357155
7	44666855	44789134	dJ647J21	-0.588959	0.48484	-0.0184012	-0.320039	-0.0222351	NaN	-0.128813	1.04605
7	45048357	45140601	bA111G20	0.0505826	0.38525	0.844291	0.577709	0.339458	-0.277555	0.180967	0.869309
7	45627423	45697309	bA132L11	0.510401	0.0109927	0.818625	0.769893	0.47156	0.479421	0.103488	0.595109
7	45697110	45864440	bA571N3	0.580083	-0.0262215	-0.910372	-0.336753	-0.121406	1.56605	-0.129248	0.56883
7	46307758	46474472	bA95J15	-0.25756	0.0624755	-0.913108	-1.04675	-0.152177	-0.892164	-0.213671	0.246068
7	47317837	47481567	bA21H20	-0.000335748	0.185507	0.655096	-0.341964	0.378677	-0.454549	0.174792	0.752363
7	48561296	48652420	dJ815D20	0.32889	0.220528	0.0123207	0.123146	0.0924309	-0.787424	0.0150662	0.288248
7	49525326	49687983	bA127A24	0.429168	0.149249	0.398238	0.452972	0.227877	0.545716	-0.191236	0.356756
7	50182933	50357902	bA95E2	0.197022	-0.0616041	0.338975	0.0686369	0.47387	-0.14067	0.222502	0.158323
7	51336001	51471727	dJ718N17	NaN	0.237827	-0.0909858	-0.059346	-0.115872	-0.214431	-0.0351755	0.0682144
7	52406843	52472422	bA324M21	-0.237838	NaN	-0.811219	-0.590356	1.5018	-0.775689	-0.193541	0.314719
7	54107936	54245824	bA436F9	-0.162761	0.106683	-0.418317	0.0785456	-0.889774	-0.211614	-0.222596	-0.111661
7	54347610	54525011	bA449G3	-0.181879	0.236242	-0.450935	-0.241687	1.46155	1.48428	-0.311714	4.22607
7	54785336	54963333	dJ1091E12	1.017	-0.027411	0.612781	-0.83427	1.85551	1.024	-0.640053	4.14756
7	54963134	55088386	bA339F13	2.80941	-0.0363022	0.149452	0.114626	1.55648	0.175613	-0.334236	2.90995
7	55869906	56006003	dJ725G10	-0.528574	0.1413	2.53675	-0.976149	-0.5042	0.447539	-0.185218	0.66647
7	56379679	56543344	bA10F11	-0.704527	0.183149	-0.351615	-0.336864	-0.174158	0.689354	0.148061	0.0873967
7	62086059	62225442	dJ905H7	-0.144619	0.472225	0.188952	-0.11118	0.0361548	0.530486	-0.155897	0.471523
7	62669221	62863362	bA340I6	-0.0148272	-0.372251	-0.713613	-0.46465	0.253883	-0.545921	-0.32347	0.0213012
7	64490314	64684491	bA479O9	-0.232247	-0.32789	-1.11977	-0.441967	0.276508	-0.142932	-0.0665806	-0.0673475
7	65407869	65542912	dJ756H11	-0.288636	-0.140827	0.534687	0.46852	-0.13736	0.0824156	0.020787	0.672388
7	65732969	65801243	bA458F8	-0.0207089	0.309116	0.550568	-0.23482	-0.2924	-0.0623681	-0.182334	0.531339
7	66427061	66575716	dJ736H5	-0.9203	0.178002	0.0762409	-1.07475	-0.33445	-0.824025	-0.353857	0.23868
7	66798673	66925315	bA358M3	0.0381017	0.34329	0.992722	0.368971	-0.065636	0.63472	-0.0937494	0.285713
7	67306381	67464348	bA156A14	0.300341	0.321872	-0.565743	-0.231466	-0.186309	-0.531391	-0.224721	0.402994
7	68011330	68178892	bA3P22	-0.648577	-0.158095	1.22448	1.85209	0.125636	-0.377014	1.16294	0.733233
7	68865250	69011127	dJ715F13	0.188038	0.0157827	-1.19968	-0.434025	0.09308	-0.516621	-0.18701	-0.302988
7	70447588	70603291	bA409J21	0.240553	0.181595	0.0388668	-0.321377	-0.0475485	0.336878	-0.502606	0.177912
7	70965248	71035094	dJ635O5	-0.102015	-0.0267277	0.452764	0.266233	0.00518158	-1.29211	-0.165822	-0.165901
7	71731058	71916794	bA313P13	0.338473	-0.0644016	-0.219792	0.513343	0.209458	0.423255	0.0930143	0.0343436
7	73521013	73619028	dJ771P4	-0.842399	NaN	NaN	-1.19407	-0.00320988	-1.22697	-0.214272	0.553029
7	74736049	74882904	bA107L23	-0.318373	-0.458079	-1.00652	-1.11427	-0.692499	-0.895741	-0.646545	-0.191574
7	75950356	76121892	dJ799O8	0.242305	0.0590715	-0.0104887	-0.111553	0.500874	0.455717	0.0519844	-0.521755
7	76251007	76447666	bA467H10	-0.456666	0.0559046	0.497797	0.392444	0.303648	NaN	0.176764	0.121458
7	76731534	76877499	dJ562A11	-0.519025	0.166316	-0.751245	-0.436196	-0.117972	-0.734549	-0.0142076	0.399695
7	77471173	77660208	bA538D15	0.361814	-0.0865028	-0.535945	-0.0682985	0.42105	0.152522	0.228465	-0.281359
7	78176311	78182543	bA343J14	0.643492	-0.26047	NaN	0.475065	0.637731	0.866442	0.349321	-0.0995917
8	128344345	128428452	dJ80K22	-0.419754	-0.0782103	-0.865	-0.407256	-0.143302	-0.336952	-0.267486	-0.330498
7	79299444	79405482	dJ1057M1	0.727354	-0.100722	1.50009	1.07172	0.559036	-1.6416	0.133504	0.291543
7	80148213	80288468	dJ1136A10	-0.282109	0.292326	1.32996	0.924589	0.878793	-0.232194	0.202263	-0.0340661
7	81117081	81261739	dJ560O14	1.06872	-0.338961	1.12539	1.26569	0.750306	1.2922	0.639967	0.323055
7	81261540	81318826	bA575G1	-0.0312675	0.764251	1.73877	2.30943	1.32246	0.0636393	0.598947	0.233005
7	82117738	82261101	dJ784G16	0.201361	0.0638704	-0.0799449	0.075358	0.332817	0.444055	0.28429	-0.232548
7	82991197	83060436	bA242J14	-0.204298	0.0381065	0.144746	0.822708	1.14934	1.53648	0.468249	-0.310483
7	84191021	84351707	dJ1093O17	-0.213199	0.260717	-0.342989	0.846119	0.403034	1.34492	0.547937	-0.237898
7	84489926	84658916	bA533L22	0.473531	0.390964	1.41421	2.12936	1.19202	2.25995	0.63606	-0.0492511
7	85131451	85246277	dJ650P9	0.168511	-0.0829285	-0.678556	-0.178905	0.313497	0.420849	0.0629118	-0.356177
7	86712927	86861070	bA212B1	0.321262	0.204074	0.868777	0.756808	0.187047	0.495628	0.211971	-0.053699
7	86740252	86869055	bK137N13	0.384552	-0.039862	0.0373245	0.194268	-0.0766817	0.44822	0.257764	-0.247677
7	86838301	87015680	bK60P12	0.454766	0.25579	0.443205	0.548979	0.187982	0.0322431	0.0996218	-0.154206
7	87557728	87629737	dJ1078A23	-0.325136	-0.160657	1.59543	0.404149	0.324626	0.517893	0.187514	-0.154662
7	87813781	87921210	bA174I14	0.487664	-0.173216	-0.385911	0.147412	0.279106	0.727195	0.183969	-0.558858
7	88431567	88528524	dJ998H4	0.276485	0.276415	0.465712	0.276109	0.476231	0.39338	0.122246	-0.207245
7	89089674	89209669	bA263N12	0.281579	0.140435	-0.0554285	0.597626	0.376325	-0.207083	0.120804	-0.021076
7	90233951	90255292	bA311I10	0.127398	-0.0230114	-0.435844	-0.0981145	0.235753	-0.0578309	0.139398	0.0316414
7	90720874	90840019	dJ1084H12	-0.947687	NaN	-1.96407	0.324986	0.371125	0.467025	0.159429	-0.237592
7	91760792	91834690	dJ1099C19	0.236025	0.780597	0.0509179	0.453394	-0.12091	0.108981	0.0141273	0.57039
7	93160639	93263236	bA455I9	0.198247	0.226228	1.14063	-0.222087	-0.429906	-0.0979509	-0.00951191	-0.220703
7	94075294	94187861	bA101N13	-0.279958	0.120158	0.375484	0.0977346	0.228668	0.179916	0.176518	0.125542
7	94924175	95070862	bA95A10	-0.047172	-0.059339	-0.698695	-0.355682	0.275056	1.64695	0.209573	-0.156965
7	96872374	96926166	dJ1145A22	1.21786	-0.298599	-0.480841	0.323564	0.382903	0.641717	0.171378	-0.369083
7	97074215	97171770	bA380G21	-1.03763	0.304991	0.164482	-0.628413	-0.491606	-0.280618	-0.273507	0.694435
7	97683109	97851192	bA196B15	-0.198417	-0.171076	-0.897795	-0.0921215	0.116275	-0.285755	-0.0696543	-0.109663
7	98465321	98544836	dJ550A13	0.332689	-0.313266	2.35586	0.97228	0.97831	0.421388	0.338853	0.824529
7	98624996	98631582	bA114P12	0.454778	-0.0553688	0.0842554	-0.435667	0.273321	0.884807	0.283058	0.609639
7	99128084	99228180	dJ604G5	NaN	0.159305	NaN	-0.449084	0.00927803	-0.903955	-0.218747	0.457822
7	99267148	99399911	bA506M12	-0.144864	1.60664	-0.267289	-0.127756	0.195546	-0.249214	0.318543	0.567355
7	99684698	99798384	bA44M6	0.773679	1.0896	0.906145	0.879347	0.583094	1.37008	0.306527	0.324349
7	100735998	100882404	dJ1059M17	-1.27438	-0.392359	-1.92165	-1.85352	-0.218237	0.340915	-0.386219	0.374849
7	101065594	101108137	bA333G13	0.124418	0.065023	-0.232644	-0.212572	0.104067	0.140884	-0.220069	-0.472655
7	102273739	102429473	bA401L13	0.107748	-0.320479	-0.0897093	0.214601	0.207371	0.0629206	0.160088	0.350276
7	102709069	102852437	dJ672O11	0.780632	0.314867	0.453676	0.482452	0.545672	0.591742	0.179338	-0.128087
7	103723759	103843899	bA148A10	-0.111615	-0.200539	-0.206686	-0.23355	-0.276359	0.175356	-0.0887552	-0.039284
7	105381520	105508322	bA22N19	0.0440769	0.0159425	0.262497	0.0458499	0.301655	0.472631	0.0311188	-0.211987
7	105588091	105635132	bA17I10	-0.141577	0.395024	-0.690024	-0.239504	-0.131237	-0.0234805	0.166577	0.0295109
7	107188601	107193327	bA443I10	-0.381116	0.163524	0.0753844	-0.343783	-0.0567865	-0.643865	-0.258255	0.278875
7	107761960	107816142	bA5N18	-0.434251	0.258317	0.651484	0.829225	0.46601	0.133461	0.161689	0.197829
7	108644141	108798356	bA238I13	0.531774	0.0990855	0.371179	0.306578	0.498423	0.734716	0.304138	-0.0978098
7	108798351	108951650	bA10E6	0.504713	0.0882687	NaN	1.20505	0.186467	0.807444	0.335708	0.166944
7	109765445	109926073	bA358A10	0.639192	-0.0773717	0.144905	0.465324	0.730884	0.17894	0.201882	-0.157475
7	110626327	110734571	dJ905M6	0.438242	-0.0668748	0.521828	0.817271	0.725953	0.289115	0.192916	-0.199948
7	112038856	112194717	bA328M22	0.455994	0.120385	0.122561	0.0865906	0.755012	0.522162	0.35497	-0.177178
7	112686097	112824276	bA264E11	-0.350191	-0.147062	-0.024894	-0.0940583	0.00966963	-0.313177	-0.0779694	-0.050482
7	113777396	113929217	bA563O5	1.30821	0.94372	0.975939	1.57567	0.363053	-0.0806767	0.629931	0.233153
7	114727017	114854852	bA45K3	0.0777071	-0.116525	-0.240904	0.200223	0.494546	-0.0191121	0.385968	-0.222402
7	115497425	115524189	bA354H2	0.0759776	0.0732466	-0.274695	0.289464	0.261288	0.452231	0.116816	-0.210798
7	115886546	116110880	bK13N12	0.0537799	-0.0644173	-0.256923	0.264262	-0.00627997	0.191501	-0.137245	-0.218114
7	116121310	116216905	bA374M7	-0.18761	0.22514	-0.0572806	-0.147928	-0.00973478	-0.189633	-0.0250493	0.243974
7	116405447	116442446	dJ866N18	0.240998	NaN	NaN	0.222046	0.158305	0.124844	-0.0753192	0.349393
7	117794884	117946771	bA126C19	0.361325	-0.149638	-1.02506	0.388144	0.123157	0.323368	0.480711	-0.408288
7	118382769	118560071	bA105B19	-0.182206	0.0737923	-0.0778827	0.245763	0.674227	0.946323	0.221807	-0.381029
7	119457424	119610900	bA376O14	0.38916	-0.0808357	0.0502252	-0.0738922	0.383935	0.181795	0.202631	-0.293025
7	120733065	120863671	dJ745K6	0.0501419	0.680612	1.22958	-0.385144	0.0730644	-0.384112	0.0219807	0.0553857
7	121124725	121195000	bA384A20	0.284267	0.30881	1.53527	-0.502428	0.270455	0.424332	0.220471	0.0756839
7	121344412	121521887	bA560I19	-0.330715	-0.0375921	-0.330147	-0.469581	-0.123149	0.00586778	-0.0052619	-0.0789644
7	122302491	122456909	bA106F1	0.36072	-0.00915158	-0.32529	-0.31099	-0.428471	-0.325129	-0.380986	0.193845
7	123346233	123467342	dJ902E20	-0.0162851	0.195309	-1.12246	-0.523971	0.147424	0.0790073	0.183766	-0.17179
7	123465343	123476620	bA264K23	0.65166	0.132422	-0.84675	0.194674	0.514946	0.99839	0.261413	-0.333188
7	124430834	124585669	bA420H19	0.300035	0.328849	0.51846	0.38686	0.259353	0.471502	0.182478	0.132601
7	125885273	126044867	bA21K15	0.455158	0.165075	-1.3385	0.00381527	0.488323	0.669665	0.192917	-0.778643
7	125911005	125979704	bA24C13	0.565426	-0.0367357	0.829673	0.278778	0.397082	0.556331	0.466326	0.0041383
7	126861266	127020292	bA224A1	0.675665	-0.0876534	-1.26546	0.542372	0.26649	-0.188126	0.00193914	-0.00234913
7	127142454	127339799	bA391H5	0.0510717	-0.120834	0.624611	0.234011	-0.0939654	-0.183099	-0.207956	-0.101092
7	128163171	128320749	bA128A6	0.313116	1.45652	3.69355	1.58834	1.18319	0.265831	0.846393	1.35614
7	128966300	129180461	bA437L1	-0.673592	0.297236	1.38986	-0.866547	-0.142267	-0.480584	-0.145085	0.333862
7	129007525	129037704	dJ999D10	-0.0286275	0.353377	-0.147038	0.150993	0.451251	0.0632704	0.0755521	0.60455
7	129830034	130022801	bA36B6	-0.211424	0.415612	-0.767126	-0.321308	-0.212595	-0.228473	-0.0881679	0.0956827
7	130350292	130544814	bA329I5	-0.106674	0.276645	-0.405776	-0.339767	0.166458	-0.247921	-0.137418	0.0556695
7	130884337	131060545	bA193I17	0.187576	-0.485872	-0.605319	0.0818822	-0.0321701	-0.0166927	-0.143904	-0.161241
7	131724119	131946912	bA355K3	0.00803563	0.148608	0.0160097	0.099197	0.188729	0.222286	0.021086	-0.035689
7	133610541	133774171	bA239G19	0.00493614	0.329627	0.292046	-0.256957	-0.0335439	-0.672952	0.0763625	0.249211
7	133830935	133986590	bA221G19	0.611641	0.214185	0.354934	0.421301	0.540949	0.837695	0.0361061	-0.0110133
7	134436276	134594573	bA371N6	0.317429	-0.269169	-0.95435	-0.283847	0.395453	0.613514	0.0314599	-0.284524
7	136015635	136168619	bA88K4	NaN	0.305446	0.286562	0.648922	0.779895	0.170766	0.316659	-0.354787
7	136357950	136531793	bA102G17	0.735094	0.163037	0.73929	0.90894	0.543082	0.898466	0.296219	-0.340279
7	137669514	137843891	bA269N18	-0.170076	0.28621	-0.00481768	0.157564	-0.288944	-0.184354	0.0802025	0.540255
7	138134252	138327894	bA383F6	0.407203	-0.480286	-1.10256	0.0433501	0.0257795	0.760181	0.111357	-1.31047
7	138870155	139013923	dJ886O8	-0.783736	0.0709147	-1.72823	-0.504229	-0.581898	-0.867275	-0.362594	0.180814
7	140076153	140205575	dJ1173P7	-0.16881	0.295991	0.335258	-0.0898685	-0.183578	-0.102559	-0.255792	0.163689
7	140595678	140663629	bA237G17	-0.112454	0.323517	0.196795	0.16787	-0.312651	-0.368313	0.0264586	0.336483
7	140661634	140777004	dJ894A10	-0.103641	0.26529	-0.264942	-0.239991	-0.185356	-0.428116	-0.0388015	0.04211
7	141998762	142023944	bA282G13	0.083776	0.368023	NaN	0.0905766	0.333553	-0.111515	-0.212578	0.20618
7	142541849	142741971	bA298A10	0.806247	0.114358	-0.251265	0.275531	0.0173539	1.19875	-0.983658	-0.0161557
7	143536315	143643109	dJ721B17	-0.113511	-0.110157	-0.263847	-0.328872	-0.0544168	-0.197448	-0.123873	-0.349816
7	143827352	143919469	bA374N8	0.410382	-0.0172059	0.647459	0.427629	0.211897	0.555563	0.269448	-0.129649
7	144611013	144735305	dJ819O4	0.368523	0.0543287	0.314916	0.184049	0.532657	0.0464863	0.197851	-0.13433
7	145643443	145786692	dJ558L10	0.84305	0.183938	-1.95664	0.370288	0.57316	1.05241	0.153923	-0.317489
7	146471453	146633667	dJ811H12	-0.424527	0.138928	0.0267152	-0.367578	-0.0773294	-0.392538	-0.159354	0.175432
7	146768222	146943332	bA302C22	-0.305845	0.168505	0.217253	0.394883	0.166313	0.283924	0.16323	0.145955
7	147589879	147773264	dJ1136G13	-0.37647	0.0180549	-0.138034	-0.258087	0.0589244	-0.444481	-0.300104	0.100779
7	147993329	148069799	bA24N19	0.0183544	0.406596	-0.0368424	-0.12201	0.154363	0.0168245	-0.0484118	0.295961
7	148146543	148310570	dJ800G7	0.969335	1.02047	1.0193	1.83583	0.253236	-0.588435	1.48933	0.712564
7	149391899	149506901	bA511P7	0.926373	0.472917	1.42273	0.60187	0.493975	0.503367	0.154178	0.251847
7	149853706	149978582	dJ548K24	-0.468756	-0.136284	-0.604379	-0.859689	0.0261844	-1.34809	-0.415937	0.322277
7	150217467	150253365	dJ548D19	-0.202073	0.288196	0.532078	0.037005	0.447488	-0.38307	-0.205325	0.273805
7	151251402	151400007	bA208G20	0.120987	-0.226736	-0.323564	-0.00268525	0.23599	-0.12396	0.359382	0.556383
7	151773651	151913800	bA312C1	0.103807	-0.379637	-0.762364	-1.06958	-0.480015	0.233842	-0.0962766	0.0789084
7	153273478	153325416	bA317C13	0.578471	-0.462233	0.073759	0.732285	0.423579	-0.205338	0.0672564	-0.211264
7	153434321	153585518	bA422E4	0.189114	0.252971	2.59946	0.279935	0.0268774	0.424237	0.0597377	-0.0480522
7	153962149	154095840	bA269M19	-0.235588	0.240012	0.483151	-0.508899	-0.083701	NaN	-0.276315	0.119313
7	154625854	154794271	dJ1015O24	0.0650621	0.484845	0.165128	0.35492	0.498095	0.122326	0.0743094	0.430999
7	154803522	154958258	bA69O3	0.657279	-0.19345	-0.0636197	0.517616	0.474315	NaN	0.307001	0.290376
7	155654009	155812227	dJ982E9	-0.118168	-0.0688185	-0.375714	-0.284975	-0.0573509	-0.116624	-0.388519	-0.192007
7	156674258	156793059	dJ703P8	-0.196214	0.237847	-0.823774	-0.527718	-0.334479	-0.20633	0.208261	-0.216246
7	156915915	157130143	bA452C13	0.0153795	0.184867	0.370611	-0.237455	0.192828	-0.334736	-0.0216232	0.313691
7	157159506	157364822	bA518I12	NaN	-0.0709431	-0.624739	-0.196196	0.338234	-0.0719947	-0.208226	0.0431266
7	157425793	157525793	PAC3K23	0.185615	0.0328712	-0.00892954	0.146697	0.25022	-0.124881	0.15743	-0.0115761
7	158231881	158297016	dJ764O12	-0.121404	-0.0858514	0.169246	-0.433748	0.144851	-0.458255	-0.250745	0.122212
8	350000	450000	BAC77L23	-0.144024	-0.0505069	3.63124	1.37028	0.919524	0.749904	0.545967	0.547179
8	640817	821582	bA338B22	-0.103133	0.0375399	0.294675	-0.279354	0.138412	0.50785	0.0421125	0.186246
8	1719445	1805592	dJ593A12	0.247882	0.0678173	0.855907	0.410521	0.643017	0.220502	0.192288	0.01117
8	1801861	1869864	dJ605G11	0.360658	0.302488	1.2071	0.956833	0.649057	0.466903	0.184824	0.331354
8	2466781	39951348	bA104F14	0.0305136	-0.134732	-0.32872	-0.145427	-0.124035	0.332037	-0.00504391	0.173452
8	3061757	3232055	bA336N16	-0.101206	0.00702957	-0.445608	-0.531797	-0.341276	-0.113018	-0.151314	0.170241
8	4062809	4229980	bA45M12	-0.101098	-0.182014	-0.295981	-0.273842	-0.0935189	-0.121417	-0.126884	0.0192503
8	4187855	4386741	bA16H11	0.22473	-0.0500588	0.534361	0.66027	0.110259	0.684829	0.29628	0.00247881
8	4759285	4918981	bA1K11	NaN	-0.41065	-1.54524	0.935492	0.44832	1.05274	0.272795	-0.0879024
8	5269314	5419278	bA29A2	0.529753	0.106496	-0.44375	0.0868759	-0.0755843	0.826751	-0.0990298	-0.135338
8	5489193	5622450	dJ991O23	-0.668979	0.101235	-1.29473	-0.129865	-0.319107	-0.365409	-0.207721	-0.223424
8	6072217	6158772	bA245H16	-0.394302	0.873717	-0.950269	-0.305829	-0.405739	-0.162623	-0.0024448	-0.197389
8	7917613	7995792	bA540E4	-0.0216159	0.487177	3.09222	-0.338933	-0.158386	-0.00822047	-0.0994876	0.880429
8	8323422	8511345	bA211C9	-0.355728	-0.173745	-0.000249414	-0.316685	-0.310539	-0.177135	-0.0927841	0.020483
8	9636853	9781380	bA241P12	0.0134255	-0.0317807	0.177045	0.17778	-0.095071	0.397046	-0.267503	-0.0748424
8	10467878	10630122	bA177H2	-0.0171658	-0.129116	-0.636187	-0.415492	-0.293005	-0.365759	-0.151979	0.0697449
8	11404627	11573705	bA297N6	-0.383367	-0.538709	-1.2763	-0.294606	-0.0991289	-0.10092	-0.0989821	-1.09045
8	11461005	11636753	bA589N15	0.821922	0.0430287	-0.336805	-0.0276225	0.42014	-0.266977	0.145733	0.259824
8	14008917	14191975	bA433L7	1.25259	-0.058938	0.140049	0.0442397	-0.287505	2.10322	0.164742	-0.203369
8	15010177	15176533	bA60C8	0.088132	0.0121651	1.13333	1.11592	0.265818	0.6078	0.0869787	0.0587218
8	15557561	15699688	bA44L18	0.0599289	0.0126461	-0.0815721	-0.479738	0.351695	-0.121761	0.0743557	-0.749869
8	16088081	16237777	bA255E13	-0.0546176	-0.0333975	-0.518846	0.350419	0.299788	0.533455	0.163574	-0.206173
8	17549208	17715970	bA525O22	-0.701796	-0.226384	-0.961031	-0.628101	-0.487834	-0.441977	-0.595554	-0.0592642
8	18014283	18215109	bA809L8	0.167517	-0.107344	-0.437929	-0.432728	0.0143137	-0.134569	-0.298592	-0.19981
8	18212558	18409406	bA161I2	0.222679	-0.296282	-0.275399	0.0916915	-0.0191149	0.311354	0.0536906	0.0610364
8	19608613	19660956	bA667P13	0.073565	0.0248609	0.377091	-0.283204	-0.297158	0.193039	-0.311829	-0.125046
8	20465438	20655099	bA369E15	-0.41821	0.0369516	-0.170931	-0.288538	-0.34965	-0.368765	-0.281368	0.130429
8	21463191	21637218	bA529P14	-0.799741	0.0800125	0.864945	-0.965782	-0.314817	-1.02377	-0.322381	0.169188
8	22164037	22283556	dJ660C16	0.472983	0.11922	-0.928527	0.468823	0.0337123	0.544291	-0.053314	-0.793396
8	22871934	23051255	bA177H13	-0.471029	0.276644	0.795141	0.973854	0.366915	0.17222	0.728413	0.304965
8	24043487	24234020	bA561E1	-0.45916	-0.376942	-1.10554	-0.80886	-0.287895	-0.394094	-0.007651	-0.207591
8	24915706	25104723	bA395I14	-0.508588	0.326972	0.0724854	-0.0971682	-0.0349538	-0.682445	-0.297153	-0.0258101
8	25971081	26141154	bA14I17	-0.262038	0.0104218	-0.0727763	0.137514	0.264242	0.38418	0.129935	-0.206322
8	27041871	27069182	bA138J2	-0.657073	-0.121174	0.685074	-0.355894	-0.417217	-0.523934	-0.178997	-0.0953265
8	28203985	28396212	bA356F24	-0.435911	0.00301005	-2.3011	-0.0209325	-0.00530562	0.0575478	-0.200086	-0.208777
8	28692409	28823388	bA263C6	0.353111	0.274026	0.766307	0.445297	0.219609	0.473606	0.0932581	0.115526
8	29558341	29699328	bA366G13	-0.198054	-0.0612879	-0.219506	-0.242341	-0.0257343	-0.0582482	-0.0456721	-0.15962
8	30552803	30727149	bA293D9	0.989689	0.0475935	1.1356	1.88845	0.110225	0.00900654	1.42695	0.719778
8	30682363	30862460	bA473A17	-0.105452	-0.133398	0.189244	0.110531	0.00103057	-0.861654	-0.230876	-0.376335
8	30789771	30979714	bA363L24	-0.447895	-0.0496038	-0.0456646	-0.330292	-0.809334	-0.516546	-1.45563	-1.32268
8	31644642	31823262	bA22F19	-0.00307912	-0.256707	-0.858915	-0.430176	-0.148977	-0.581885	-0.0518221	-0.20254
8	32275657	32407224	bA301H15	0.405229	0.500426	0.951716	1.35708	0.0632444	0.607152	0.380608	0.231448
8	32592098	32765288	bA11N9	0.029933	-0.0104293	-0.450953	-0.0327414	-0.0264078	0.241306	0.283249	-0.307607
8	34220574	34397462	dJ144M5	-0.235998	-0.00205964	-0.125469	-0.871534	-0.227971	-0.66523	0.0326447	0.141669
8	34287764	34455012	bA75P13	0.222528	0.30913	1.11163	0.488103	-0.676443	-0.504826	0.0541709	-0.116125
8	35044489	35079324	dJ155L11	-0.0892567	0.315444	0.462935	0.146921	-0.221303	0.176591	-0.0295329	0.00969899
8	36102265	36115548	bA98I12	0.04765	0.105913	0.0911208	0.405044	0.0886313	0.154083	0.111459	-0.454413
8	37204481	37371241	bA197P20	0.340703	-0.363103	0.127439	0.302536	0.3029	0.448396	-0.194779	0.0306954
8	37947954	38110788	bA350N15	0.0363887	0.309783	0.172214	0.200614	0.106656	0.175566	0.355219	0.369845
8	39458390	39607397	bA44K6	-0.727174	0.460736	-0.234919	-0.310451	-0.797238	0.55818	-0.271603	0.406391
8	40122856	40271044	bA51K12	0.0918616	0.0496926	0.0012873	-0.069912	0.0691646	0.251895	-0.313556	-0.326781
8	40890688	41046378	bA15G16	0.202996	-0.0270348	-0.0590647	0.1975	-0.171197	0.202359	0.126429	0.505751
8	41138965	41224620	dJ198M21	-0.777388	0.235437	-0.957809	-1.29158	-0.51983	-1.47303	-0.566491	0.292259
8	41766934	41955506	bA231D20	-0.729255	-0.0232462	-0.627117	-0.451706	-0.308394	-0.350555	-0.308236	0.128335
8	42107045	42296092	bA503E24	-0.101909	0.211972	0.0898421	-0.669078	-0.703341	-0.0495988	-0.397928	0.164381
8	42937609	43051560	bK2115H11	-0.263839	-0.418258	2.16541	-0.284132	0.0190019	-0.0546644	-0.321437	-1.37742
8	47388038	47553642	bA350F16	0.525551	-0.0764194	0.0726407	0.411525	0.89259	0.804699	0.4851	-0.598651
8	48247465	48397374	bA137L15	0.207793	0.0118096	0.366741	0.00170162	0.508864	0.72809	0.166706	-0.0329462
8	48328021	48449340	bA167E7	-0.395258	-0.689291	0.433527	-1.11005	-0.186182	0.11727	-0.416889	-0.490179
8	49071182	49246550	bA567J20	-0.199892	-0.0218288	NaN	-0.34534	0.0549137	-0.286683	-0.294422	-0.0579247
8	49498418	49658692	bA22C8	0.0729344	-0.615066	-1.00871	0.232677	0.120075	-0.85099	-0.0967803	-0.283447
8	50442769	50563568	bA401N18	-0.0385013	0.18364	-0.119455	0.0319947	0.134075	-0.632689	0.0216621	-0.239234
8	51483937	51664779	bA46G17	0.39675	0.138144	0.804291	0.325518	0.224514	0.37872	0.110184	0.552113
8	52337416	52481168	bA11C20	1.30997	-0.303227	-1.19611	-0.83681	-0.228306	-0.338282	-0.0619835	0.0142985
8	52639486	52735650	bA197I11	0.0607222	-0.173052	-0.289115	-0.261566	0.0521934	-0.153286	-0.205736	0.0164532
8	53262565	53354952	bA283I17	0.360468	-0.110495	0.354435	0.555271	0.340496	0.369614	0.473865	-0.203775
8	53498986	53666234	bA182E14	0.0135903	1.25336	-0.189205	0.150651	-0.284267	0.219751	-0.272617	0.0935644
8	55065437	55227810	bA53M11	0.126378	0.0849794	-0.174616	-0.18147	-0.0886514	0.186366	-0.147497	0.129432
8	56506041	56690389	bA446E9	0.867998	0.673592	1.703	-0.195758	-0.0789222	-0.336082	-0.0644292	-0.102191
8	56772153	56914254	bA140I16	-0.0341256	0.0813929	-0.80841	-0.104324	-0.280427	-0.373076	-0.350049	-0.0889408
8	57478832	57657894	bA342K10	0.138731	-0.143526	0.108012	0.178371	0.00309905	0.0978478	-0.172956	-0.116526
8	57786692	57939142	bA513O17	-0.798363	0.361385	0.219525	0.589312	0.555712	0.0452649	0.158912	0.133817
8	59013365	59180349	bA114M5	-0.0292658	-0.0682227	-0.336682	0.388604	-0.0916248	0.0761391	-0.0212276	0.131428
8	61236554	61411816	bA414L17	0.38469	0.197512	1.37908	-0.0941211	-0.346267	0.45868	-0.372623	0.245581
8	61479259	61554406	dJ491L6	-0.686538	0.401398	-0.514254	-0.72717	-0.664469	-1.09177	-0.772777	0.537456
8	61829586	62011027	bA35A5	0.0260647	0.166394	NaN	-0.179489	-0.140581	-0.150689	-0.582872	0.139963
8	61965844	62054938	bA313H6	0.530269	0.231763	0.462889	1.10612	0.655522	0.734779	0.260526	-0.0122229
8	61971789	62133432	bA227F6	-0.176731	-0.277103	NaN	-0.130498	-0.00367928	-0.0765718	-0.0128113	-0.0664477
8	64026573	64211809	bA45K10	0.477327	0.131166	-0.412475	0.169978	0.254774	0.766463	0.218006	-0.199316
8	64938487	65111900	bA115G12	0.0140551	0.485054	-0.0298115	0.397013	0.190398	-0.473843	0.152966	-0.531969
8	65562827	65752704	bA89A16	0.253998	-0.103998	0.97882	0.546181	0.358629	0.335168	0.104624	0.0850694
8	65602777	65711964	dJ252K6	-0.325406	0.177171	1.00232	-0.723815	-0.3623	-0.651177	-0.17242	-0.106933
8	66739606	66861326	bA366K18	-0.246911	0.24772	-0.39404	0.0555344	-0.164807	-0.142439	0.248551	0.0274744
8	67742340	67924506	bA446H10	0.532706	-0.364787	1.3028	-0.825099	-0.618952	-1.04183	0.10314	0.274205
8	69451201	69616969	bA21C5	0.12788	0.0565811	0.266762	0.264744	0.397022	0.262306	0.311132	-0.0853829
8	69783341	69939572	bA21C17	0.411788	0.0775305	0.210236	0.250919	0.0451514	0.162842	0.439535	-0.199535
8	72160813	72328296	bA2B15	3.20785	-0.0357783	-0.0940454	-0.184744	0.00638105	0.497141	0.173402	-0.0364558
8	73059447	73238151	bA351E7	0.1885	-0.402503	-0.000927813	-0.0272641	0.20947	0.0492852	-0.275099	-0.607903
8	73282722	73471476	bA313C15	0.315469	-0.156031	-0.109536	0.130805	-0.492289	0.384075	0.221249	-0.426227
8	75410961	75586703	bA3N13	-0.292156	0.201481	0.483188	0.904037	0.59928	-0.67108	0.513205	-0.422349
8	75573453	75722946	bA88N8	0.0397941	-0.0370448	-0.37413	0.149859	-0.181755	-0.236046	-0.0639748	-0.150447
8	76794164	76955286	bA202L1	-0.481716	0.141532	0.347091	0.772023	0.300759	-0.398049	0.360847	-0.296356
8	77430450	77590012	bA48D4	NaN	0.0309182	0.0993227	0.0887262	-0.158499	0.407535	-0.115096	-0.171016
8	78490225	78622670	bA12L20	0.464535	0.0638511	0.707787	0.544767	0.311838	0.439254	0.453445	-0.317425
8	79194601	79335900	bA523D2	0.117689	0.152902	1.2861	0.981271	0.48612	0.0785865	0.394763	-0.0808628
8	80286856	80454433	bA27N21	0.364036	NaN	NaN	0.455964	0.221074	0.989739	0.260688	-0.161232
8	81054077	81209481	bA48B3	0.264444	0.404558	0.350455	0.431477	0.225155	0.499899	0.124844	0.212219
8	81464963	81656320	bA62E9	-0.400229	-0.0302849	-0.206173	-0.465015	-0.247547	0.324714	-0.137188	0.160079
8	82183356	82329060	bA34M16	0.219435	-0.0072757	-0.10437	0.25381	0.290729	0.327703	0.122594	-0.0184386
8	83938989	84110709	bA51M18	0.644664	0.0142611	0.900893	0.767623	0.690525	0.885114	0.457825	-0.219983
8	84697331	84879708	bA120I21	0.159081	0.204978	0.0505482	0.281192	-0.0395727	0.0876989	0.275098	-0.101447
8	86095369	86208876	bA178A2	NaN	-0.0381152	-0.190165	0.0415361	-0.0501074	0.437348	-0.449538	-0.390333
8	87210245	87416060	bA298P6	-0.0792047	-0.0521637	-0.0585078	-0.0707883	0.0296853	0.109913	0.0437076	-0.122196
8	87745346	87902296	bA2F15	-0.150581	0.119327	-1.89821	-0.501026	0.208452	0.435571	0.214342	-0.125803
8	88817671	89000551	bA433O22	-0.676391	0.124542	1.32628	0.912809	0.643087	-0.422039	0.330082	-0.224071
8	89677077	89819943	bA353O11	0.347801	-0.0233418	-0.560502	0.0564268	0.126621	0.481253	0.334349	-0.094341
8	90548509	90654912	dJ1098O20	0.252216	0.245456	1.22082	-0.180792	-0.256171	0.213352	-0.0934956	0.173337
8	91982311	92153032	bA353D5	0.045181	-0.175661	-0.995002	-0.340932	-0.0730093	-0.804857	-0.350283	-0.0178278
8	93160371	93308372	bA3J21	0.24601	0.00604306	0.394514	0.73315	0.479104	0.563121	0.357373	0.561147
8	93813906	94023913	bA388K12	-0.127717	-0.114306	-0.457745	-0.347305	0.184155	-0.11824	-0.0100074	-0.289719
8	94958125	95108148	bA266D22	-0.119632	-0.230125	0.381447	0.316747	0.34926	0.840783	0.132456	-0.15985
8	95630121	95777663	bA320N21	0.110116	-0.202273	-1.05733	-0.522965	-0.819286	-0.632608	-0.303954	-0.423708
8	97372718	97544018	bA3D19	0.505591	-0.0571844	1.0122	0.656214	0.0878013	0.177502	0.207104	-0.0579207
8	99215537	99366374	bA24H3	0.973774	0.427066	1.80656	1.26836	0.34952	1.06668	2.49169	0.242524
8	101279091	101431725	bA10G10	-0.488167	0.0891359	-0.472824	-0.0714349	-0.335528	-0.306497	-0.0218242	0.05219
8	101325505	101501316	bA304H10	-0.138161	-0.0724285	-0.807073	-0.80607	-0.173918	-0.25156	-0.108058	-0.135929
8	102162253	102308880	bA373L22	-0.20942	0.0138474	-0.42194	-0.322779	-0.393191	-0.412836	-0.0490393	-0.041723
8	102295847	102476213	bA21E8	0.467994	0.221048	-0.316128	0.323494	0.170062	0.300625	0.276098	0.261045
8	103418005	103467012	bA150P21	-0.621837	-0.0970395	-0.175693	-0.540613	-0.258238	-0.995603	-0.34554	0.47114
8	104525089	104610696	bA188I6	0.300179	-0.021489	-0.262217	0.1452	0.723887	NaN	0.220714	-0.331171
8	104817649	104946300	bA132E3	-0.243804	0.0192523	-0.406918	-0.326795	-0.105999	-0.0498671	-0.223937	-0.231041
8	105602303	105800179	bA200A13	0.497545	-0.394124	-0.131315	0.784693	0.40679	0.598507	0.307632	-0.410744
8	107820491	107973246	bA79F7	-0.12754	-0.047285	0.642585	0.263134	-0.0376639	-0.179999	0.0876164	-0.0656628
8	108006920	108167162	bA20P9	0.256673	0.2466	-0.320366	1.14636	0.124516	0.0578132	0.220851	-0.154337
8	108980084	109137354	bA115M13	-0.248668	0.143004	0.309899	0.544683	-0.230059	0.137116	-0.0510623	-0.193944
8	110036427	110212168	bA419L20	-0.45408	0.107301	-0.262067	-0.361846	-0.400597	-0.320312	-0.344565	0.330937
8	111700123	111865784	bA114O8	-0.0280607	0.254494	-0.188813	0.561666	0.375112	-0.428734	0.120531	-0.210041
8	112115337	112283578	bA544H16	0.525584	0.234166	-0.692818	0.943412	0.340669	-1.32135	0.289563	0.411678
8	113092397	113259535	bA11A18	0.589623	0.114084	0.549507	1.15461	0.834267	1.12631	0.487171	0.124331
8	114028515	114174084	bA252H14	0.121828	0.178673	0.299618	0.249696	0.434479	0.12549	0.17822	0.10119
8	115374661	115514892	bA2K18	-0.389233	-0.195615	0.606523	0.685669	0.33861	0.681014	0.045366	-0.168699
8	116883493	117083818	bA536K17	0.355509	0.0433309	0.508839	0.0376428	0.36382	0.449365	0.215714	-0.287605
8	117896701	118036620	bA67N21	-0.349455	0.0196622	0.179704	0.929481	0.366997	-0.311054	0.133464	-0.0774405
8	118172827	118337362	bA494N20	0.0143466	0.0248729	-0.362918	-0.0800985	0.0703168	0.764526	0.0954501	-0.321459
8	119798302	119961178	bA72M5	0.63222	-0.0616525	-0.508568	1.00079	0.609683	0.601812	0.287976	-0.41201
8	120711400	120863829	bA22A24	0.00702113	-0.131699	-0.494678	-0.532491	-0.223758	0.444456	-0.231262	0.109076
8	122320844	122475611	bA16G11	0.337275	0.00934892	0.302637	0.45542	0.505104	0.58792	0.267235	0.111609
8	122743719	122893632	bA115M9	-0.581032	-0.466017	0.268939	0.209101	0.240671	NaN	-0.238552	0.296402
8	123125490	123297613	bA96B2	0.1026	-0.00859783	-0.416136	-0.0908567	0.101551	0.197049	0.0624578	-0.307722
8	124150132	124318050	bA174I12	-0.241835	-0.112442	-0.696351	-0.354153	-0.247912	NaN	-0.370237	0.118953
8	125233070	125440138	bA532M24	-1.60839	-0.450591	-2.37403	-2.02527	-0.861516	-1.88412	-0.435025	0.469064
8	126198803	126398470	bA495D4	-0.53921	0.559473	-0.281338	-0.362887	-0.393726	-0.0273851	-0.283182	0.348731
8	127163233	127363932	bA28I2	-0.109711	0.0218655	-0.142839	-0.296389	-0.0874038	0.0199031	-0.0427601	0.0170603
8	127913285	128090044	bA382A18	-0.665945	0.23849	-1.22439	-0.739435	-0.508555	-0.689259	-0.192304	-0.292301
10	89738194	89939729	bA380G5	-0.175175	-0.454649	-0.421424	-0.152373	-0.0274388	-0.251559	-0.119723	-0.416858
8	129940315	130060025	bA3O20	0.723199	0.632149	1.85779	1.41241	0.601245	-0.138872	0.707792	0.147806
8	130164147	130179767	bA17E16	-0.0227219	-0.0356931	-0.256603	-0.0827502	-0.0481743	0.00821303	0.146014	-0.0153514
8	131243135	131396939	bA269I24	-0.0454927	-0.0534113	-0.863973	-0.3757	-0.40102	-0.921938	-0.0432462	-0.262413
8	132092605	132206568	bA4C17	0.386548	0.131446	0.0363401	0.0164527	0.445771	0.469308	-0.00427317	-0.472782
8	132800425	132900852	bA71N3	0.191179	-0.0144411	0.708753	0.261317	-0.330785	0.388159	0.0769668	0.111449
8	133758245	133856770	dA98A24	-0.479809	0.928342	-0.0579902	-0.670894	-0.271964	-1.30123	-0.459818	0.295244
8	135192573	135355179	bA45B19	0.143488	-0.268525	-1.17952	-1.20403	-0.445547	-0.810074	-0.483314	-0.470708
8	136085570	136268636	bA343P9	0.216661	-0.14546	-0.211157	0.121429	0.605653	0.292922	0.584678	0.024238
8	137408755	137594868	bA356M23	0.0830543	0.0164056	-0.260338	0.102064	0.184976	0.232031	0.000376683	-0.398615
8	137773461	137919469	bA17M8	0.250246	0.110618	0.83946	0.478817	0.152022	0.351388	0.229632	0.184697
8	138922576	139068480	bA172M18	-0.0291492	0.0825657	0.337543	-0.057658	-0.461858	-0.157995	-0.251914	-0.223356
8	139900634	140058900	bA526P7	1.05846	0.0527158	0.0200135	-0.361281	-0.600446	-0.840241	-0.260101	0.0238282
8	141011084	141167032	bA65A5	-0.137366	-0.0119627	-0.888868	0.158413	0.188543	-0.386351	-0.0605022	0.105851
8	142226603	142404467	bA370K2	0.0062881	-0.164876	-0.665805	-0.387776	-0.00669278	-0.173048	-0.15263	-0.293566
8	143704322	143804322	PAC489D14	-0.895118	0.490747	0.560029	-0.879789	-0.511052	-1.27878	-0.428282	0.391648
8	144107566	144231625	dJ1118A7	-0.00499155	0.518944	NaN	0.139057	0.511053	0.0323395	0.413252	0.390968
8	144197593	144320316	bA472K18	-0.655911	-1.32887	-0.920485	-1.36406	-0.0769693	-0.898651	-0.901592	0.00903504
8	145245925	145393572	bA349C2	-0.0874608	-0.253043	-0.0697783	0.0900251	0.341917	0.233276	0.0964377	-0.0885075
8	145637605	145801056	dJ1056B24	-0.284124	0.78994	0.558988	-0.487578	-0.143624	-0.19875	-0.264086	0.500192
8		111911034	bA294M6	0.047491	-0.0887898	-1.95198	-0.649439	-0.378146	NaN	-0.0548002	-0.559239
9	190	100190	BAC41L13	0.476236	0.112998	0.36686	-0.0627695	0.310477	-0.0854558	0.127109	0.0485621
9	2136330	2296367	bA48M17	-0.28727	-0.214888	0.743569	-0.440935	-0.638199	-0.944214	-0.188529	0.00739655
9	2583789	2658649	bA320E16	0.120861	-0.156447	0.180427	-0.070045	0.702486	-0.162335	-0.0368007	-0.195762
9	3533196	3696642	bA509J21	0.398335	-0.088442	1.43994	0.67072	0.369015	0.714175	0.408581	-0.0625384
9	4819656	4991841	bA125K10	0.10749	0.0862408	0.76285	0.527143	0.162805	-0.459532	0.356996	-0.0516265
9	4991742	5008809	bA509D8	0.289798	-0.0513734	0.723151	0.561864	0.193012	0.341316	0.279403	-0.144793
9	5993678	6062142	bA218I7	0.447766	-0.0613896	0.605	0.0404657	0.0708418	0.135668	0.123756	-0.168463
9	6599727	6659690	bA106A1	-0.162481	-0.138081	1.05148	0.571704	0.210619	0.246983	0.541597	1.0822
9	7904421	8056890	bA29B9	0.0575822	-0.10372	1.04106	0.896087	0.164705	0.461582	0.570453	-0.0267219
9	8398602	8490985	bA175E13	0.383557	-0.172581	-0.737786	0.151179	-0.301927	0.635374	0.229288	-0.247534
9	9657591	9823759	bA527D15	0.340225	0.284439	1.61318	1.18001	0.648312	1.32801	0.724486	0.0221339
9	9999831	10094473	bA19G1	0.296184	0.464152	0.146745	0.455457	-0.0220139	0.483174	0.275388	-0.241503
9	11227455	11303482	bA23D5	0.502291	-0.124536	0.685685	0.221372	-0.0175576	0.568937	0.288134	-0.445648
9	11389654	11588151	bA352F21	0.10881	-1.01267	-0.739136	-1.52604	-0.654595	0.286443	-1.72206	-2.78953
9	12281538	12346848	bA446F13	-0.634985	-0.267278	-1.32534	1.09578	0.468715	0.927976	0.611842	-0.373407
9	12872920	12952270	bA187K14	-0.317954	-0.0631988	0.536734	0.296345	0.102138	-0.36593	0.318707	-0.106838
9	13729563	13912972	bA413D24	0.0247167	-0.127539	-0.319879	0.11155	-0.362567	0.247278	0.125334	-0.476002
9	14500602	14586756	bA408A13	0.146663	-0.205755	0.00712774	-0.336663	-0.320817	0.197632	-0.106133	-0.239414
9	15298239	15401988	bA490C5	0.383347	1.01616	2.78662	0.535931	0.284574	0.922384	0.165023	0.0796984
9	16141129	16325493	bA109M15	0.81142	-0.270841	0.493518	-0.536909	-0.367746	-0.402548	-0.233729	-0.199163
9	16995146	17138368	bA132E11	0.241185	-0.109	NaN	0.508864	0.179649	0.206711	0.103122	0.0410828
9	17055049	17219772	bA333I7	-0.309645	-0.525467	-1.6064	-0.865294	-0.0646136	-0.286958	-0.263602	0.25921
9	17839216	18013851	bA123J20	1.05361	-0.1244	1.61131	2.08482	-0.142027	0.0610656	1.54886	0.507462
9	18579960	18743122	bA503K16	0.246312	-0.130145	0.0308188	0.229254	-0.198397	0.35079	-0.042626	-0.1351
9	19310506	19423218	bA513M16	0.719648	0.395829	1.9739	1.3892	0.635533	1.23829	0.14482	0.735828
9	20172503	20351133	bA15P13	0.347706	0.113577	0.796125	0.336791	-0.198827	-0.256319	-0.00596964	-0.594625
9	20996402	21158465	bA113D19	0.234379	-0.332485	0.0400771	0.551468	0.0219141	0.154595	0.323337	-0.578965
9	23376558	23557472	bA495L19	0.202403	-0.146832	0.741555	0.54421	0.202616	0.405823	0.150675	-0.497206
9	24090707	24243454	bA33K8	0.795244	-0.395743	0.525598	1.15041	0.578824	0.218788	0.466887	-0.629829
9	24937708	25069412	bA468C2	-0.280628	0.090875	1.2466	0.924298	0.545402	0.921495	0.302643	0.0490409
9	25690184	25853241	bA33G16	1.15354	-0.0508372	2.09531	1.64161	0.638691	0.552887	0.690477	-0.0476262
9	26516497	26681795	bA5P15	0.361652	0.101989	-0.00733849	0.206946	-0.499933	0.108106	-0.000131251	-0.34557
9	27449442	27590268	bA27J8	-0.044452	0.0866815	0.338082	0.0989513	-0.222584	0.0776417	-0.150616	-0.39305
9	28040168	28204458	bA20P5	0.492789	0.197116	1.01425	0.624348	-0.0354567	0.415698	0.166482	-0.392387
9	28670843	28755650	bA264J11	0.120875	0.195507	0.164589	0.155352	-0.114085	NaN	0.0250132	-0.471743
9	29567031	29639070	bA48L13	0.336837	-0.0351	-0.165635	0.286289	0.210408	1.01635	0.51618	-0.450093
9	64698967	64868959	bA274B18	0.325942	0.41608	0.297989	0.813274	0.218785	0.430439	0.358852	0.423856
9	65136300	65307680	bA265B8	-0.414695	-1.0964	0.185422	0.0491999	-0.193655	-0.490462	0.0163331	0.288754
9	65827866	66017142	bA109D9	0.138703	0.0549048	0.166584	0.0874604	0.0610009	0.208122	0.0645532	-0.171322
9	66869083	67017915	bA141J10	0.58534	-0.114621	-0.228862	1.13142	0.0242795	-0.407135	0.330789	-0.0284801
9	67655101	67805871	bA563H8	0.501951	0.16996	1.07023	0.550107	0.294665	NaN	0.325101	0.1416
9	68661968	68781345	bA429L21	0.332676	0.736886	1.29545	0.513726	0.40151	0.217361	0.644926	0.833436
9	69188839	69357940	bA71A24	0.544241	0.236537	-0.399274	0.593503	0.211446	0.540681	0.212244	-0.0967927
9	69964634	70137399	bA401G5	NaN	0.452078	0.667937	1.8623	0.203765	0.0489691	1.26362	0.581758
9	70882661	71077950	bA174B4	0.0824139	-0.176203	-2.41427	-0.0800118	0.0924201	-0.277336	0.173987	-0.0241368
9	71779974	71889004	bA66O21	0.213619	0.0195205	0.00141258	0.092467	0.139049	0.353908	0.267973	-0.184803
9	72491960	72594096	bA422N19	0.966178	0.812887	NaN	3.05895	0.817679	1.78482	1.04171	0.890111
9	73242027	73308995	bA490H9	1.30822	-0.450324	-1.40296	3.60974	1.00066	-0.38943	0.57796	0.712906
9	74310493	74476864	bA336N8	0.388191	0.279927	0.360425	0.490103	0.204064	-1.44886	0.434125	-0.0326439
9	74884513	75056844	bA174K23	-0.11059	0.317277	-0.795019	-0.333563	-0.0613286	0.0888311	0.0505976	-0.156692
9	75805451	75827128	bA362L2	0.754456	0.256532	0.748684	0.804138	0.618606	0.848587	0.397232	-0.368822
9	76558853	76695820	bA384P5	0.437098	0.144206	0.854594	0.41156	0.420616	0.490981	0.272632	-0.0695209
9	77332038	77445068	bA66D1	0.128848	0.0951135	NaN	0.157414	0.110506	0.20537	0.0240763	-0.174812
9	78396090	78511527	bA432M2	-0.147855	0.00668413	0.0537565	0.275548	0.0274861	0.370031	0.428335	0.0992361
9	79032840	79148211	bA541F16	0.898715	0.212074	0.36736	0.903715	0.325163	0.0132431	0.471436	0.145973
9	79656109	79740740	bA439A18	-0.309904	0.288498	0.15569	0.028292	-0.00981354	-0.123467	-0.0487526	0.11621
9	80545731	80702686	bA59M22	0.49225	-0.121238	0.363567	-0.00354814	0.255705	0.599022	0.620329	0.457454
9	81439794	81613817	bA172F7	0.145955	0.291761	1.24798	0.662151	0.204978	0.134608	0.189833	0.190311
9	82306822	82356042	bA280P22	-0.171996	0.162833	0.105445	-0.131044	-0.267887	-0.878936	0.0470316	0.167022
9	83152592	83305883	bA276H19	0.452309	0.287272	1.09092	0.860822	0.446619	0.798655	0.328574	-0.0258344
9	83620807	83740617	bA40C6	-0.399013	0.176699	0.250198	0.00699511	0.130123	-0.568987	0.148071	0.597376
9	83738618	83811521	bA249H20	-0.469627	-0.400251	0.295259	-0.453463	-0.0153741	-0.787096	-0.640364	-0.0774981
9	83809767	83980006	bA65B23	1.71982	-0.114609	2.10163	-0.312841	0.0243589	-0.119083	-0.251343	-0.102405
9	84277234	84348987	bA345K9	0.176731	-0.0275776	0.231129	-0.131373	0.07376	-0.150354	0.190563	0.155749
9	85054758	85157267	bA176L21	-0.0380365	0.0799155	-0.115498	-0.085524	0.0228387	-0.53964	0.135128	0.0279996
9	85977930	86016207	bA8B23	-0.114066	0.15757	-0.133966	-0.310675	-0.081459	-0.447759	-0.0513238	0.1423
9	86445213	86621634	bA555F9	0.0539198	2.22146	0.118792	0.915896	2.74058	2.62178	2.13281	2.15957
9	87430023	87600920	bA440G5	1.08195	0.65695	-0.205053	1.60723	0.116348	0.0684495	0.909806	0.559683
9	88541206	88708939	bA19J3	0.182771	0.156508	1.07035	0.450783	0.273621	0.0982869	0.234602	0.346949
9	89507879	89678723	bA30L4	0.317391	0.168046	1.53942	0.511619	0.35575	0.129184	0.411732	0.508376
9	90750781	90875339	bA279I21	0.95811	0.348273	1.07128	1.57641	1.29117	1.58652	2.05453	1.14814
9	91432625	91622267	bA435O5	-0.0879113	0.268466	0.637467	-0.176442	-0.0439976	-0.155954	-0.256819	-0.321218
9	91865409	91866150	bA160D19	-0.224309	0.000756413	0.713191	0.76889	0.253993	0.0308712	0.112687	-0.00127692
9	92438144	92607789	bA240L7	-0.375049	-0.0113186	2.65378	-0.371698	-0.203332	-0.386676	0.0139495	0.531406
9	93498478	93663909	bA23J9	0.418419	0.253985	0.70158	0.479895	0.402974	0.687007	0.220917	0.485881
9	94001453	94162248	bA23B15	NaN	0.203246	-0.725067	-0.206954	-0.283209	-0.630196	-0.040352	0.222744
9	95022150	95172079	bA92C4	0.106107	0.0786906	0.707416	0.0448865	0.331377	-0.265795	0.0782632	0.444999
9	95171980	95306944	bA192E23	-0.263787	0.00588816	-0.826256	0.356872	0.317007	-0.445736	0.103475	0.975558
9	95304945	95413075	bA96L7	-0.552366	-0.163109	-0.682997	-0.871309	-0.574944	-0.671462	-0.579285	-0.220122
9	95648765	95792203	bA547C13	0.618336	0.291998	-0.0469259	1.42858	0.302898	0.7472	0.296111	0.232171
9	96514494	96555643	bA208F1	0.0680231	-0.536729	-0.842134	-0.0370947	0.188514	-0.755776	-0.035555	0.107998
9	97166534	97335580	bA80H12	-0.0620443	0.116959	0.441894	0.435785	0.285286	0.437574	0.236028	-0.0459424
9	97899288	97995687	bA75J9	NaN	-0.0516717	0.0298351	-0.118607	0.32325	-0.0370909	0.352393	-0.174809
9	98648128	98808391	bA342F21	-0.862283	NaN	-0.072473	-0.483086	-0.268856	-0.69483	-0.462965	0.557304
9	99774990	99796887	bA318L4	1.47788	0.0923281	-0.088542	2.49923	1.4471	NaN	1.00261	0.515356
9	101003026	101132633	bA31J20	0.320868	0.818819	NaN	1.36851	0.591527	0.616913	0.891294	0.920565
9	101601630	101740381	bA287A8	-0.0692487	0.153315	0.653531	0.294655	0.199475	0.0770999	-0.0877774	0.209351
9	102625795	102813532	bA540H22	0.114289	0.238243	0.999126	0.219464	-0.043551	0.127409	0.0376841	0.089338
9	103458470	103620978	bA78H18	-0.027886	-0.20007	0.138317	0.24147	0.00227617	-0.0186249	0.0793134	0.20194
9	103735161	103934761	bA438P9	-0.290277	0.138	-0.249776	-0.23675	-0.107435	-0.299784	-0.313961	0.117107
9	104662529	104846070	bA400A24	0.478091	-0.351208	0.955984	0.563634	0.411043	0.805025	0.234807	-0.130098
9	105636261	105644863	bA388N6	-0.258307	-0.0415316	0.522234	0.0577829	0.235625	-0.183303	0.322355	0.817251
9	106380954	106457421	bA470J20	0.748085	0.0485286	1.191	1.05224	0.505849	0.800576	0.514252	0.896991
9	107333403	107510091	bA202G18	0.364892	0.217318	0.220233	0.297773	0.254702	0.508784	0.126804	0.0923848
9	108108905	108199214	bA570D4	1.00151	0.387518	2.07685	0.300451	0.226348	1.74963	0.199542	0.533688
9	108969823	109067179	bA88M9	0.0682446	-0.0377638	0.0301767	0.592534	0.346277	0.211463	0.29508	0.226402
9	110035590	110219891	bA534I8	-0.59337	-0.00238784	0.741164	0.433285	0.207656	0.369708	0.114921	0.542821
9	111332893	111439104	bA279J9	-0.634393	0.0415171	-1.91508	-0.502889	0.442552	1.21795	0.233437	0.013575
9	111353657	111536760	bA445L6	0.174279	-0.0313783	-0.371863	-0.25461	-0.160283	0.225897	-0.307666	-0.722509
9	111534761	111578666	bA382H18	0.423372	-0.0583088	-0.0529714	0.353122	0.164857	0.484267	0.149974	-0.169665
9	111634237	111856320	bA404K23	-0.0141949	NaN	-1.04729	0.295568	0.0667154	-0.458169	0.0327136	-0.528535
9	112380714	112495168	bA58C3	0.990615	-0.0172344	0.222908	0.184125	-0.179848	1.3101	-0.0277083	-0.111678
9	112782238	112937703	bA67K19	0.523844	0.0367565	1.40168	0.620463	0.441892	0.54245	0.231372	0.0763728
9	113668924	113708486	bA388N2	0.203429	0.21521	0.549344	0.539724	0.108318	0.322709	-0.0642713	0.126924
9	114518695	114607614	bA451E16	0.12702	0.132147	-0.284256	0.0412401	0.093241	0.351842	0.0619686	-0.302603
9	115353788	115445656	bA574M5	-0.407825	0.00443927	0.200912	0.26622	0.33947	-0.702919	0.132009	-0.227775
9	115445557	115597922	bA28O4	0.272913	0.225379	0.506295	0.505665	0.345941	0.399054	0.0712416	-0.0185155
9	116149987	116255054	bA360A18	NaN	0.011901	0.542585	0.2538	0.112551	0.162325	-0.162405	-0.182465
9	117296557	117443585	bA165P4	0.648683	0.403908	1.08184	0.997736	0.792671	1.10811	0.338085	0.422642
9	117443486	117552415	bA477J21	-0.291667	-0.0364516	-0.689503	-0.803952	-0.0867254	-0.0510263	-0.393846	-1.00315
9	118065477	118238538	bA429D3	-0.174002	0.126084	-0.0933938	-0.0152822	0.129149	-0.191999	0.191772	0.308972
9	119258784	119272443	bA137O6	-0.0704787	0.0311391	-0.607516	-0.0642718	-0.229422	-0.336247	0.0997926	-0.202905
9	119865963	120063017	bA417B4	-0.204714	-0.0194145	0.330116	0.191337	-0.0613346	-0.0865697	0.146961	0.207031
9	120541770	120704608	bA101K10	-0.0942265	-0.0593283	0.257764	-0.000269787	-0.0206897	0.0495171	0.0244459	0.232962
9	121645960	121741356	bA269P11	0.127511	-0.403646	-0.148148	-0.0705435	0.188545	0.1307	0.606557	0.452341
9	122723686	122767940	bA205K6	0.455352	-0.0650957	0.853191	0.57169	0.572817	0.401054	0.282691	0.521265
9	123783526	123804636	bA373J8	-0.100049	0.312402	0.939557	0.110447	0.337624	0.0660697	0.209536	0.356653
9	124915364	125082027	bA545E17	0.562006	0.13637	1.05581	0.834779	0.574085	0.602864	0.437179	0.295104
9	126310643	126346519	bA202H3	0.171342	0.361393	1.48994	0.595635	0.321557	0.634273	0.442384	0.59147
9	126834215	127007677	bA57C19	0.104472	-0.0369888	0.0934219	-0.460796	-0.490567	-1.08041	-0.337835	0.0221662
9	127005678	127182143	bA83J21	-0.123198	-0.513343	-1.01239	-1.08648	-0.862291	-1.51178	-0.572235	0.0629378
9	127270751	127320920	bA143H20	0.179213	-0.171257	-0.192626	0.104106	-0.207209	0.442232	0.292135	0.246854
9	128345857	128442968	bA5N16	0.417188	0.388453	0.0403725	0.33118	0.395294	0.35821	-0.0618523	-0.00775979
9	128985209	129184321	bA295G24	0.162997	-0.0604017	-0.535667	0.0945912	-0.116191	0.0223391	0.0223314	0.250818
9	129967247	130085917	bA153P4	0.265304	-0.00199016	-0.567549	0.0150108	-0.208823	0.300925	0.442851	0.756927
9	131495347	131716718	bA399H11	-0.00864369	0.170529	0.0330429	-0.295887	0.0982985	-0.378086	0.308531	0.434669
9	132373756	132473756	BAC135I17	-0.226461	-0.0065209	-0.0947435	-0.368511	0.0911713	-0.354063	0.0147312	0.250206
9	132505070	132659987	bA83N9	-0.460558	-0.0746874	-0.179375	-0.131813	0.086372	-0.107705	-0.0347746	-0.0668592
9	133732993	133865196	bA417A4	-0.610984	0.268595	-0.203548	-0.595729	-0.0487927	-0.87665	0.036478	0.507283
10	320000	420000	PAC306F7	-0.130673	-0.021445	-0.00395904	-0.321734	-0.127432	-0.49395	-0.338219	-0.156962
10	1206024	1370764	bA29A19	-0.0236757	-0.0926365	0.66496	0.232444	0.48821	0.434373	0.199458	-0.168526
10	4436883	4527382	bA154P11	-0.283099	-0.24615	-1.09397	-0.17159	-0.622125	0.109089	-0.215971	-0.440252
10	5787344	5955019	bA336A10	0.610108	0.177121	-0.237349	-0.622244	-0.607918	0.925088	-0.281261	0.0955791
10	6420947	6490059	bA298K24	-0.512083	0.116911	-0.388201	-0.341818	-0.296792	-0.412688	0.0827733	0.161245
10	7411375	7440519	dJ542G16	0.18936	-0.563539	NaN	0.337123	-0.0684694	0.133987	0.102507	-0.280541
10	8346114	8456758	bG756B1	-0.0307106	0.135006	0.367993	0.356603	0.084101	0.747413	0.334866	-0.0357304
10	9209951	9308318	dJ249K20	0.256749	-0.343355	0.58723	0.281336	0.270752	0.600295	0.356908	-0.428396
10	10175025	10234338	bA189M8	-0.288485	0.165263	-0.0707223	0.776483	-0.24816	-0.37149	0.67784	0.169936
10	11093737	11204688	dJ251M9	0.0488616	-0.138535	1.0767	0.64896	-0.487307	0.294028	0.231073	-0.611495
10	11915452	12122038	bA401F24	1.14419	1.06327	-0.191511	-0.331654	-0.0205392	-0.361307	0.0621235	0.164274
10	13168712	13364914	bA730A19	-0.575953	-0.0953524	0.109765	-0.507313	-0.385322	-0.631865	-0.187213	0.285415
10	14481733	14570892	bA275E20	-1.11754	-0.433862	0.675386	-1.0582	-1.27759	-1.79981	-0.367784	-0.1845
10	15091867	15186829	bA2K17	0.384834	0.209507	-0.198162	-0.528556	-0.270908	-1.12073	-0.0866985	0.670831
10	16204932	16307032	bA37P5	-0.804246	-0.232915	-0.120954	-0.0648101	-0.339193	-1.00114	0.0393622	-0.424311
10	17117174	17220361	bA337F21	-0.959905	0.25358	0.268925	-0.489122	-1.09185	0.450145	-0.181167	0.276933
10	17925957	18031985	bA16O1	-0.461452	-0.0733319	-0.101954	-0.286006	-0.22227	-0.459702	-0.034374	0.0394371
10	18952541	19077111	bA383B4	0.0833954	-0.365108	0.0399085	0.199508	-0.268773	0.423526	0.0853821	-0.0580315
10	20173234	20271235	bA188P8	1.0056	-0.194594	0.0856393	0.753245	0.0857487	0.807884	0.710342	0.0533921
10	21492462	21605497	bA165O3	-0.685422	0.0967368	-0.162671	-0.254706	-0.953022	-0.736146	-0.0204423	0.248879
10	23234002	23430005	bA379L21	0.200443	-0.0798662	0.968302	0.743815	0.107433	-1.15078	0.334176	-0.109087
10	24306925	24451674	bA162E8	-0.113554	-0.161415	-0.172695	0.0507559	-0.0169478	-0.0618445	0.497577	-0.503623
10	25251193	25381839	bA129O7	NaN	-0.171819	NaN	-0.111661	-0.675865	0.181324	-0.116492	-0.229608
10	26079923	26242799	bA307B23	-0.225152	-0.0316476	0.247234	-0.325799	-0.523714	-0.384207	0.154681	0.0458751
10	26907545	27052210	bA128B16	0.369237	0.425918	-0.292888	0.555473	0.193251	0.725333	0.676091	0.55929
10	28061041	28224732	bB355A21	-0.156891	-0.186213	0.166948	0.178595	-0.556662	-0.224082	0.200566	-0.186217
10	29140329	29255584	bA478H13	-0.0517622	-0.075047	-0.260087	-0.381097	-0.159689	-0.682528	0.0476872	0.241119
10	31035986	31208764	bA14C22	0.138198	0.127537	0.185626	-0.0958674	-0.145862	-0.247372	0.0443565	0.258577
10	31959562	32151385	bA472N13	0.196146	-0.160592	-0.154062	0.366481	0.129343	0.47128	0.166968	-0.409145
10	33285054	33483026	bA479G22	0.309131	-0.066474	-0.476706	0.444663	0.302314	0.429729	0.335845	-0.171774
10	33924684	33928683	bA505N10	-0.459056	-0.333155	-0.820817	-0.0891565	-0.525426	-0.404756	0.160258	-0.296404
10	34756453	34860809	bB404M3	-0.497873	-0.35989	-0.810311	-0.734967	-0.83311	-0.552249	-0.223295	-0.799019
10	35948995	36115001	bA425A6	-0.390579	-0.105624	-0.26428	0.0820082	-0.367511	-0.37775	-0.0124178	0.302119
10	37083141	37254488	bA254A5	-0.937722	-0.0817976	1.06641	1.53577	0.0485006	-0.794611	1.50304	0.862399
10	37803916	37863853	bR164I22	-0.0968465	-0.021094	0.60436	0.440007	-0.502001	0.0421024	0.304764	-0.37418
10	38767825	38882748	bB445N5	-0.290508	0.226794	1.1092	0.463088	-0.445755	0.719465	0.00319278	0.293398
10	43116052	43274386	bA124O11	0.308781	-0.227715	-0.998234	-0.167332	-0.090519	-0.238676	0.489108	0.132101
10	44358229	44430468	bA38B21	0.0235296	1.96971	0.267385	0.162513	0.0311134	-0.396033	-0.04291	-0.15438
10	45443877	45612349	bA432I13	-0.680045	-0.00484169	-0.506981	-0.554085	-0.289277	-0.887002	-0.0165463	-0.0051071
10	45997530	46032050	bA534N5	-1.65043	-0.0499443	-0.152191	-1.69066	-1.13396	-2.00204	-0.168897	0.341028
10	47335366	47495861	bA292F22	-0.562795	0.0115602	0.575937	-0.318219	-1.11878	0.367055	-0.0396723	-0.407232
10	48213217	48417728	bA463P17	0.352097	-0.172503	0.488487	0.279693	0.135738	0.546832	0.116659	0.00693237
10	49189682	49343940	bA13E1	0.460947	-0.263142	-0.861546	-0.44143	-0.44689	0.435068	0.125821	-0.390626
10	49452644	49659552	bA541M12	-1.17468	-0.566025	-1.75989	-1.37299	0.383372	-0.400127	-0.105374	-0.646549
10	52151517	52328336	bA532F4	-0.712594	-0.480951	-1.31263	-0.828362	-0.679943	-0.681991	0.0692069	-0.386194
10	53120747	53291835	bA47O13	0.248303	-0.411697	-0.269688	0.430473	-0.103478	0.413325	0.198258	-0.394182
10	54134736	54323985	bA556E13	-0.314739	-0.220246	-0.328287	0.707065	-0.308945	0.13897	0.118589	-0.461132
10	54992227	55161357	bA548F5	-0.0313633	-0.068981	-0.0936123	-0.0777537	0.0656919	0.0753695	0.138971	-0.747725
10	55818385	56021643	bA313B15	-1.03222	0.147386	-1.13312	-0.95019	-0.92841	-1.38393	-0.186122	0.277436
10	56932219	57104585	bA430K23	-0.527206	-0.552926	-1.32187	-0.510761	-0.160779	-0.144501	0.188145	-0.602223
10	57776593	57891203	bA183D3	-0.113774	-0.0482669	-0.892498	-0.129615	-0.353339	-0.0667271	0.44239	-0.616559
10	60317745	60493067	bA79I23	0.0661119	NaN	0.335205	0.082135	-0.332526	-0.0201411	0.230212	-0.044661
10	61035880	61199031	bA357A18	-0.877252	-0.327044	-0.657593	-0.333144	-0.359646	-1.1214	0.218692	-0.34875
10	62124592	62291417	bA166B18	-0.270676	-0.17753	-0.315936	-0.35029	-0.461487	0.00260909	-0.225828	-0.0770637
10	63088548	63218497	bA809M12	0.475495	-0.22158	1.03636	0.300149	-0.129895	0.297474	-0.105909	-0.132575
10	64003004	64177737	bA13A2	-0.399938	-0.403005	-0.472987	-0.0887647	-0.463468	-0.334179	-0.657444	-0.471494
10	65271829	65457624	bA428N21	-0.158039	-0.53564	-0.627638	-0.279279	-0.430954	0.0837796	0.0447407	-0.566514
10	65932349	66124153	bA176H12	0.137529	NaN	0.135033	-0.0473151	-0.601789	0.0884621	0.258497	-0.215072
10	67621509	67801673	bA210G22	-0.338465	-0.162804	-0.388985	-0.483864	-0.210829	0.081989	-0.0946146	0.309254
10	67799674	67868072	bA778O10	0.647396	-0.130874	1.24479	0.845259	0.165462	0.9255	0.323293	-0.224303
10	69663492	69824149	bA297N15	-0.636804	0.0401963	-0.0647882	-0.227892	-0.377161	-0.39549	0.227634	0.233396
10	70510596	70681959	bA314J18	0.220916	0.272594	0.348594	0.655881	0.205269	0.0331016	0.453994	0.409318
10	71709616	71896490	bA367H5	-0.747779	0.0765905	-1.00788	-0.767058	-0.320009	-0.792375	-0.179342	0.293097
10	72868232	72990519	bA58O1	0.337497	3.88438	0.744923	1.18114	2.34213	NaN	0.858897	1.46779
10	74143931	74151617	bA326F3	-0.196914	-0.0558428	0.149398	0.145085	-0.32471	0.0636898	0.0905877	0.0830109
10	75041056	75117740	bA345K20	-0.124316	0.260382	0.246372	0.102583	-0.159134	0.00765886	0.0788033	0.0980034
10	75947886	76118719	bA506B4	0.362615	0.592935	-0.887924	-0.537144	-0.452473	-0.388629	0.271198	0.0826424
10	76915344	77104982	bA399K21	-0.852834	0.325732	0.274603	-0.976162	-0.659011	-0.854247	-0.205234	0.105832
10	78103560	78232802	bA325D15	0.23359	-0.347603	-0.0861383	-0.115787	-0.601845	-0.459766	0.01208	-0.680099
10	78909604	79005815	bA328K22	-0.628043	-0.492815	-0.59367	-0.571478	-1.09927	-1.09006	-0.510925	-0.34365
10	79003816	79056354	bA619F23	NaN	-0.29877	NaN	-0.42468	-0.531686	-1.19435	-0.352681	-0.0218046
10	79910369	80067437	bA90J7	0.371476	0.348368	0.0080731	0.14799	0.367528	0.05564	1.14348	0.914675
10	80802915	80846786	bA574P20	1.64743	-0.0228467	0.0748522	-0.819442	-0.160055	2.15757	0.0364007	-0.147284
10	82057108	82137591	bA40F6	0.599683	0.209897	0.0538167	-0.559619	-0.200286	0.533985	-0.0404375	0.317602
10	82620395	82789946	bA20E23	0.355426	-0.0896392	0.715158	0.210596	0.206575	0.135821	0.30873	-0.163591
10	83661200	83778429	dJ684F13	-0.0748886	-0.165948	1.09363	0.406161	-0.0709024	0.110376	0.242649	-0.11453
10	84424513	84577760	bA95M17	-0.372679	-0.291239	-0.623772	-0.0757935	-0.544212	-0.301533	-0.089087	-0.420378
10	85745030	85849741	bA219F10	0.35627	-0.261273	0.299239	0.123303	-0.180426	0.0372906	0.129489	-0.438458
10	86462809	86531375	bA470J18	-0.7596	0.719558	0.374702	-0.697837	-0.414984	-1.17263	0.0101109	0.392536
10	87353774	87454216	bA113E21	-0.109654	0.541083	1.10952	-0.0955931	-0.467417	-0.3568	0.0823335	-0.427191
10	88196119	88363898	bA396M20	-0.283314	0.0433006	0.20433	-0.467503	-0.091876	-0.379624	0.18503	0.0683895
10	89673152	89836182	bA165M8	-0.0539494	-0.166542	-0.300829	-0.218814	-0.110951	-0.146442	0.136445	-0.18575
10	123355327	123529724	bA62L18	0.158014	0.15373	0.954868	0.394321	0.136294	0.0324252	0.17322	0.315315
10	89937730	89980747	bA765C10	-0.426322	0.342363	0.363326	-0.0484057	-0.580241	-0.622027	0.0124437	-0.176375
10	90696184	90739639	bA304I5	-0.304158	-0.377645	-0.821348	-0.582161	-0.453974	-0.365055	0.230663	-0.332047
10	90737655	90924967	bA399O19	-0.508076	-0.0611796	-1.23178	-0.693692	-0.620069	-0.364521	-0.0399999	-0.655116
10	91456500	91604895	bA80H5	-0.35132	-0.211193	1.20365	-0.568829	-0.457337	-0.626755	-0.0588249	-0.228202
10	92251803	92317861	bA15K3	-0.261189	0.0291076	0.276064	2.1176	0.641175	-0.110283	0.576351	-0.298846
10	93066027	93275460	bA92H8	0.0165755	-0.0271839	0.40344	0.0615712	-0.349993	-0.0803507	0.079262	-0.0210163
10	93879764	93975061	bA430L14	-1.48366	-0.708822	-0.00115745	-1.10168	-1.1171	-1.535	-0.0223345	0.209197
10	94941352	94973498	bA348J12	-0.395307	-0.131999	-0.161764	-0.322405	-0.497474	-1.12073	-0.169262	0.21027
10	95983868	96029621	bA162K11	0.0612054	0.160983	0.0936152	0.206091	-0.234969	-0.0721119	0.015852	-0.205841
10	97363635	97459315	bA164I17	0.403398	0.17196	-0.16415	-0.0776661	-0.196248	-0.714711	0.097285	0.12554
10	97808424	97921635	bA248J23	-0.108111	-0.278423	0.028799	0.18843	-0.407171	0.0677989	0.227875	-0.287326
10	98560404	98666909	bA196N24	0.089894	0.00467307	1.05326	0.424369	0.311119	-0.106914	0.318662	0.597075
10	99761532	99922766	bA19C6	-0.717245	-0.231934	-1.29629	-0.820974	-0.832751	-1.2289	-0.25564	-0.190296
10	101082469	101205950	bA704L16	-0.867096	0.171421	0.519063	-1.03953	-0.546007	-0.936907	-0.284281	0.194267
10	101842950	101978881	bA287G8	-0.129079	-0.178071	1.29094	-0.393321	-0.463868	-0.715542	0.0579355	0.453151
10	103036345	103126336	bA324L3	-0.0411219	-0.075354	0.437015	0.947563	0.0799291	-0.397791	0.918899	0.169369
10	103280249	103423326	bA264H19	-0.159228	-0.216203	NaN	0.164649	-0.291758	0.0237552	-0.348223	-0.147245
10	103421327	103529829	bA529I10	-0.937889	-0.197146	-1.27379	-0.677862	-0.529132	-0.5083	-0.538708	-0.682116
10	104793687	104954739	bA724N1	-0.550804	-0.325974	-0.450345	-0.516356	-0.501	-0.531294	-0.0648386	0.217939
10	106007516	106062242	bA373N18	-0.796207	-0.165357	-1.01087	-0.902034	-0.808076	-1.10186	-0.28336	0.0135702
10	106930897	106970755	bA165P9	0.0380162	-0.261683	-0.561781	0.614805	-0.333804	0.148609	0.320382	-0.344481
10	107882766	107953990	bA596L14	-0.1443	-0.366698	0.412446	0.666296	0.329652	0.60235	0.54737	-0.678056
10	108629026	108716064	bA699H2	-0.21315	0.241203	0.0527824	0.526742	-0.112665	0.5416	0.00819846	0.0321419
10	109431993	109571529	bA478K18	-0.539575	-0.552389	-1.03505	-0.438282	-0.395271	-0.681929	0.0251025	-0.464153
10	110384671	110481767	bA163F15	0.436888	0.31736	0.53172	0.375414	0.217732	1.20047	0.232847	-0.322234
10	111638890	111680324	bA271I13	-0.289669	-0.373497	-0.074896	0.0900189	-0.191165	-0.0961499	0.0821535	-0.205457
10	112565085	112639608	bA364E8	-1.06888	-0.328931	-0.995715	-0.995342	-0.76603	-1.27046	-0.118048	0.156879
10	113104382	113278172	bA381K7	-0.315809	-0.353352	-0.673542	-0.0972053	0.123567	-0.400204	0.126415	-0.664623
10	114001336	114197992	bA426E5	NaN	-0.241472	0.172083	0.0285866	-0.450649	-0.421994	-0.0917039	-0.154658
10	115015631	115199445	bA357H24	0.659225	-0.250192	-1.30613	-0.716789	-0.790436	0.942899	-0.08993	0.0986482
10	115975192	116135611	bA411P18	0.266653	-0.386457	-0.260607	-0.283507	-0.372714	-0.324898	-0.115768	-0.588222
10	116915522	117112455	bA338L11	-0.855799	-0.128561	0.230036	-0.668589	-0.949836	-0.520502	-0.15068	0.0904051
10	117938100	118104219	bA96N16	-0.483635	-0.150615	-0.60062	-0.182501	-0.802151	-0.840943	-0.0995814	-0.101271
10	119636646	119767840	bA355F22	-0.209561	0.0282407	0.0670245	0.0518347	-0.498381	0.278258	0.000861828	0.503457
10	120561206	120627095	bA427L15	-0.648955	-0.163803	-0.588222	-0.664463	-0.500006	-0.967479	0.0773437	0.247294
10	121686955	121811282	bA359E7	-0.805149	-0.271705	-0.616146	-0.629581	-0.39248	-0.847888	0.0881291	0.283942
10	122608666	122767615	bA323P17	0.717231	-0.22921	NaN	-0.501564	-0.670721	-0.689282	-0.219688	-0.118261
10	133656799	133805689	bA45A17	-0.442261	0.443203	4.72867	2.00112	0.744442	1.06428	0.848939	0.570389
10	123474616	123647392	bA45D20	0.268548	0.303262	1.22943	0.290601	-0.335858	-0.14515	0.0626258	0.0632224
10	124224768	124409786	bA436O19	-0.478765	0.0416605	0.465509	-0.213815	-0.375923	-0.869154	0.188143	0.299528
10	125074729	125276125	bA338O1	-1.08262	0.0145421	-0.730367	-0.782734	-0.767868	0.666242	-0.252889	0.0896081
10	126058481	126241435	bB238F13	-0.272327	-0.131937	-0.0619837	-0.0677343	0.0217497	-0.00143693	0.158798	0.407345
10	126605954	126760588	bA115N19	-0.678026	0.00230468	-0.699033	-0.519704	-0.278123	-0.567061	-0.164131	-0.336535
10	126682105	126841368	bA371O16	-0.122545	-0.280443	-0.00991837	-0.380102	-0.209848	-0.146106	0.350182	-0.526444
10	126811629	127006059	bA151A10	0.983077	-0.185109	-0.463257	-0.663239	-0.402811	-0.481806	-0.0848589	0.191621
10	128231791	128319635	bA16P8	-0.446027	-0.111554	-0.0260114	-0.0481558	-0.852485	-0.427262	-0.205769	-0.164545
10	128838130	129008494	bA384P18	-0.667761	NaN	NaN	-1.14729	-0.728552	-1.34838	-0.257538	-0.0263381
10	129972701	130134744	bA264E18	-0.379311	-0.0547168	0.117863	0.0867606	-0.427949	-0.313869	-0.00579475	0.241183
10	130885315	131037495	bA168C9	-0.626096	-0.0529058	-0.958449	-0.733815	-0.70088	0.872611	0.0595059	-0.354704
10	131963056	132010132	bA400F15	-0.751958	-0.0769673	-0.675673	-0.846316	-0.543152	1.26557	0.06301	0.422212
10	132490647	132674974	bA314D6	-0.429206	0.191955	-0.41305	-0.523275	0.728226	1.31076	0.0714482	-0.185293
11	118148996	118395819	bK3245B9	0.0959659	0.251581	-0.304186	0.0182799	0.325418	0.274552	0.201143	0.53951
10	134146750	134246750	PAC137E24	0.898979	-0.164243	1.95556	1.50543	0.976891	1.10207	0.592331	0.327406
10	135022104	135138414	bA122K13	-0.457402	-0.274589	-0.247088	-0.777067	-0.200553	-0.376396	0.00495468	0.266722
10		11021034	bA566K1	-0.0299968	-0.0357308	0.642974	0.318717	-0.352874	-0.125876	-0.0107807	-0.102204
10		26994884	bA162P23	-0.62919	-0.136875	-0.985863	0.232511	0.163655	-0.747981	-0.0997919	-0.235334
11	125000	225000	PAC908H22	-0.277077	-0.182891	-0.182709	-0.336087	0.00296714	-0.450445	-0.199459	0.0207945
11	1667911	1788208	bA295K3	-0.0780146	0.489668	-0.260328	-0.0751876	0.263135	0.00160839	0.0671124	-0.000392077
11	2064073	2131956	dJ416J11	0.136364	0.522957	-0.044524	0.0883892	0.329087	-1.17862	0.346349	0.581705
11	2345893	2408520	bA113A6	-0.465911	-0.0328694	-0.508006	-0.684061	-0.32361	-0.596663	-0.693246	-0.272465
11	2748317	2922885	bA19N21	0.338833	0.0604394	0.619379	0.360826	0.202556	0.599569	0.219868	-0.134201
11	3576592	3760697	bA120E20	0.19535	0.251799	1.70791	0.606231	0.650221	0.411616	0.197809	0.234984
11	3856877	4008482	bA438N5	0.108834	0.0739747	0.749379	0.500955	0.420977	0.227205	0.205989	0.330867
11	4748597	4898138	bA309J20	0.796479	-0.370483	0.236115	0.474067	0.602066	1.01388	0.209726	-0.0915082
11	5783149	5876448	bA364G22	0.246666	-0.143356	-0.778477	-0.118376	0.192275	0.260278	0.303216	-0.171787
11	6749776	6923386	bA560B16	0.229012	-0.133045	0.404946	0.585836	-0.26729	0.380426	0.0351973	0.0112506
11	7252344	7404507	bA89D4	0.429976	-0.172062	-1.38103	0.299386	0.575329	0.546168	0.211037	-0.366446
11	8147095	8370835	bA379P15	-0.918015	-0.43183	-0.779937	-0.91408	-0.358724	0.721565	-0.623893	-0.382715
11	8717535	8878274	bA152H18	0.993086	0.422818	0.738996	-0.0267531	-0.0992711	-0.569084	-0.276065	0.559107
11	9666315	9667022	bA243M7	-0.264334	0.0764231	0.11457	-0.356541	-0.0763418	-0.475554	0.0284793	0.224969
11	10470589	10531812	bA327O2	-0.580956	0.082308	-0.888734	-0.53384	-0.380353	-0.910546	-0.167219	0.213925
11	11764177	11875728	bA206L19	NaN	-0.0342917	0.0440063	0.244853	0.0375561	-0.179082	-0.17495	-0.170934
11	12451125	12626347	bA51B23	-0.177404	0.0183327	-1.4871	-0.261922	-0.224576	-0.0466365	-0.214383	0.255065
11	14002618	14181974	bA502G22	0.178895	-0.293952	0.361555	-0.600074	-0.601552	-0.55788	-0.314937	-0.0864967
11	14913125	15080561	bA7O20	0.0392985	0.170411	-0.104922	0.77018	0.489705	0.612343	0.637601	0.442468
11	15778995	15940672	bA13J19	-0.451605	-0.230996	-0.165252	0.173846	0.0872201	-0.173483	-0.156516	-0.076387
11	16709495	16884205	bA4B7	0.471456	-0.197096	0.819926	1.41695	-0.117495	-0.0458266	1.06937	0.646633
11	17512270	17608985	bK277H1	1.00647	-0.21498	0.868334	-0.164532	0.137977	0.222836	-0.226164	-0.169647
11	18298141	18373884	bA206C1	0.214353	-0.117638	0.699293	0.582991	0.265082	-0.00531959	0.129825	0.049547
11	18628080	18705241	bA504G3	-0.695843	-0.0829264	NaN	-1.1565	-0.448147	-0.52059	-0.358281	0.319626
11	19372825	19422588	bA305L22	-0.275163	-0.109291	-0.104375	-0.375009	-0.38819	-0.626381	-0.162823	0.381586
11	20289155	20455116	bA6K5	-0.123702	0.0828312	0.546828	-0.164332	-0.161328	-0.327725	-0.179608	0.0287625
11	21706597	21829680	bA121C18	0.272969	-0.0174999	0.0151545	0.573541	0.0550618	0.367197	0.124785	-0.0382991
11	22474580	22658342	bA34N19	0.203373	-0.322975	0.322075	0.228046	0.187845	0.330616	0.148731	-0.21271
11	23449537	23559384	bA496C3	-0.235922	-0.139033	-0.46872	-0.219005	-0.286989	-0.498451	-0.0534061	-0.232399
11	24445485	24634555	bA72C9	0.630061	-0.0264371	0.41229	0.753462	0.703979	0.672554	0.361285	-0.238564
11	25524160	25689308	bA108G3	0.225412	-0.420612	-0.0480375	0.0698106	-0.0514347	0.155542	-0.0196419	-0.375209
11	26283891	26485563	bA430L3	0.345379	-0.147197	-0.355359	0.28859	0.171929	0.308731	0.306784	-0.0730284
11	27306388	27466597	bA541L7	-0.184587	-0.275478	-0.684793	-0.0612978	-0.286668	-1.27914	-0.00975168	-0.00941159
11	27967439	28140995	bA406D1	0.764467	-0.731349	-0.446433	0.507326	-0.217358	0.956532	-0.296496	-0.339245
11	29162901	29335765	bA466I1	0.0901189	-0.0136578	0.313009	0.113997	-0.22133	0.21643	0.0650514	-0.468471
11	29453387	29563277	dJ859D17	-0.568931	0.314243	-0.0464192	0.196595	0.0329025	0.19303	0.0674313	-0.286547
11	30744937	30771716	bA302O8	-0.418411	-0.124217	0.684118	0.69227	0.312833	0.650027	0.0835146	-0.230025
11	30769722	30867782	dJ874H1	-0.0930268	-0.46443	-1.54336	-0.402846	-0.229315	-0.435705	2.38307	0.25401
11	31824433	31914660	bA293B1	-0.203269	0.276976	0.0270389	-0.0146866	-0.198909	-0.918918	-0.136964	0.0319747
11	31885586	31983998	dJ1083G3	0.287427	0.0494376	0.548417	0.041638	-0.204979	-0.113791	-0.216997	0.126339
11	32975122	33120385	bA48O9	0.830887	0.192761	1.35565	1.05164	0.597706	1.58661	-0.269014	-0.756788
11	33065929	33201156	dJ85M6	NaN	0.363535	0.337594	-0.89225	-0.582867	-1.40048	-0.266705	0.318057
11	33583372	33678206	dJ316D7	-0.610779	-0.211016	-0.717291	-0.790701	-0.470983	-1.19049	-0.495162	-0.536573
11	34041772	34086891	bA202M19	0.187434	0.475313	-1.29407	-0.12965	-0.167222	-0.0324912	-0.364919	0.341016
11	34842421	35018652	bA31I23	0.316319	-0.239622	0.888806	0.24361	0.118748	-0.0590706	0.0311007	-0.111644
11	35072609	35223141	dJ607I7	0.239371	0.200733	0.174471	0.0815967	-0.0878968	0.00273412	0.0626795	-0.045011
11	35223042	35228994	dJ136N16	0.838877	0.191637	0.112496	0.360221	-0.142384	1.15838	-0.0151555	0.220379
11	35228895	35412576	dJ68D18	0.010551	-0.078098	-0.0367695	0.38503	-0.236877	0.130647	0.037799	-0.0355608
11	35657471	35810959	bA115P8	0.423253	0.128398	0.771763	0.405107	0.283462	0.0837914	0.422016	-0.124314
11	35781149	35914135	bA472K20	-0.0657809	0.107111	0.854739	0.113739	-0.0441873	0.00302388	-0.179484	0.0417501
11	35807149	35837640	dJ592P18	0.27419	0.154649	0.831023	0.542323	0.174427	0.422527	0.110304	-0.216407
11	36859993	36912984	bA194C13	0.325706	-0.0151485	1.38996	0.0974101	0.266048	0.357548	0.116906	-0.53293
11	37756289	37862504	bA324K6	0.586167	0.225184	-0.630234	-0.337386	0.568498	0.245642	0.355077	-0.317224
11	38641023	38756476	bA277K23	0.673177	-0.00623317	-1.13733	-0.633105	-0.0452997	-0.632322	-0.0812746	-0.194649
11	40267552	40462098	bA307P14	0.157569	-0.350643	0.527295	0.463697	-0.128576	0.574216	0.159837	-0.114861
11	41011253	41172121	bA220C23	0.154434	-0.374695	-0.0807926	0.0670952	0.182578	0.270931	0.0212686	-0.21094
11	41918053	42099972	bA538D20	0.138125	-0.535547	-2.18849	-0.0710097	0.171342	-0.321137	-0.0269894	-0.557784
11	42998545	43097916	bA108L12	0.243112	-0.157692	-1.06725	0.420904	0.295201	0.508944	0.0852271	-0.373939
11	44252017	44352384	bA70A24	-0.174579	0.265654	0.735108	-0.200681	-0.105419	-0.195913	-0.173981	0.0488863
11	44504253	44696643	bA58K22	4.04742	-0.159715	-0.644316	-0.776656	-0.0220329	1.14371	-0.248662	-0.0854948
11	45025249	45106428	bA12C11	0.133208	0.206299	1.07605	0.667963	0.205434	NaN	0.491536	0.752399
11	46345153	46457076	bA164L18	1.13078	-0.127786	0.221505	1.48333	0.0826477	NaN	0.76041	0.330191
11	47364782	47461341	bA125F14	0.124664	0.149432	0.534409	0.271004	0.259778	0.145089	0.0926374	-0.0130533
11	47941081	48114852	bA465I24	0.297544	-0.314298	-1.79332	-1.36565	-0.930238	0.43337	-0.240388	0.174496
11	49156369	49261104	bA163G14	-0.377736	0.496217	0.967654	0.698884	0.522871	-0.705187	0.00778372	-0.0121373
11	50422171	50590963	bA227P3	-0.0875987	-0.212495	-0.00767712	-0.17047	-0.0202606	0.289531	-0.234839	-0.393255
11	55331941	55500242	bA131J4	0.803798	-0.0771037	-1.44433	0.705812	0.41907	1.00272	0.247499	-0.298373
11	56732555	56891926	bA100N3	-0.343658	-0.266947	-1.11872	0.574387	0.3171	0.602956	0.188735	-0.344957
11	57361561	57546864	bA9A4	-0.574887	0.150327	-0.213782	0.284088	0.22724	-0.769121	0.200793	0.407457
11	57397201	57472404	bA10E21	0.824643	0.094619	1.39914	1.86658	0.782517	0.718318	0.490964	0.176129
11	58020841	58172532	bA12J3	0.953615	0.344275	2.10268	1.02602	0.847141	1.04144	0.537734	0.235407
11	59396233	59579378	bA384C21	0.0597541	-0.114728	-0.403441	-0.208029	-0.0010566	0.123466	-0.0227401	-0.109928
11	59508884	59697137	bA21B14	-0.145984	-0.0109858	-0.568119	0.463845	0.532829	0.53916	0.398673	0.0208803
11	61346170	61555741	bA286N22	0.633312	2.01815	0.872979	2.72644	0.447285	0.137285	1.82765	0.902041
11	61916017	62000208	dJ466A11	-0.962888	-0.02259	-1.26957	-1.05055	-0.78844	-1.40392	-0.338535	-0.0984653
11	62270871	62271625	bA163K24	0.506672	0.0478542	0.157447	-0.0341594	0.283724	0.725228	-0.117422	0.399403
11	62724253	62875188	bA231P15	-0.394625	-1.23174	-0.999357	-0.45735	-0.0161581	-1.17859	-0.101169	-0.151015
11	64044325	64203072	bA424O11	0.545089	0.940489	0.125956	0.870286	1.05412	0.724822	0.835096	0.962462
11	64337345	64503473	bA147G6	-0.242574	-0.163242	-0.130577	-0.283679	-0.0403581	0.301269	-0.291309	-0.0427872
11	65057551	65245484	bA399J13	-0.6451	-0.244333	-0.956249	-0.623441	-0.163485	-0.387065	-0.544465	0.0549455
11	65876904	66035373	bA142G8	-0.275124	0.179788	0.047904	-0.355792	-0.109884	-0.298133	-0.357921	0.302632
11	67334622	67366045	bA126P21	0.358187	0.247016	-0.0821667	-0.253916	-0.182369	0.20005	-0.181027	0.628679
11	67929193	68101440	bA138N3	-0.359979	0.263715	0.175159	0.163515	-0.094217	-0.722996	0.215097	0.781494
11	67952827	68047677	dJ901A4	-1.03232	0.413566	1.08684	-0.148285	-0.623208	-0.70935	-0.1869	0.747124
11	68682361	68743080	bA569N5	-0.0988889	0.202416	0.307937	-0.196194	0.0384664	-1.00835	-0.119335	0.0758692
11	69002982	69194879	bA554A11	0.186081	-0.298944	-1.92341	-1.55385	-0.531187	-1.52506	-0.549828	0.273716
11	69700857	69862361	bA300I6	0.399936	-0.00396637	0.475237	0.0602521	0.128347	0.0879077	-0.182307	0.0427465
11	69853117	70039944	bA804L21	-0.169898	0.116547	-1.31092	-0.370735	-0.0230708	-0.205648	-0.0384434	-0.365234
11	70826881	70934604	bA21D20	0.214889	0.118488	0.528039	-0.0550596	0.32968	-0.182918	0.198623	0.433642
11	70851736	71024499	bA598K3	0.237684	-0.156175	-0.446281	-0.560959	-0.0568401	-0.902878	0.014055	0.19351
11	71141644	71334855	bA512I24	-0.452905	-0.134008	-0.214745	-0.419413	-0.00599065	0.0607045	0.0377879	0.18198
11	72537704	72727805	bA31L22	-0.531886	0.87358	-1.06612	0.249053	0.516876	-0.034692	-0.224982	0.575743
11	73054840	73118839	bA93M11	-0.360172	NaN	NaN	-1.06163	-0.121604	-0.474413	-0.115947	-0.0263082
11	73676966	73848622	bA28L18	0.436816	-0.00212973	0.855606	0.772853	0.552418	0.215228	0.249254	0.26729
11	74257549	74357520	bA167F22	-0.0865032	0.434366	0.720186	0.361322	0.198154	0.465529	-0.19775	0.00689947
11	75722972	75818556	bA535A19	-0.437697	-0.283721	-1.88675	-0.259211	-0.0834123	-0.72286	-0.0222848	0.228996
11	75965024	76130350	bA25F7	1.76951	-0.198445	1.85334	3.03252	0.599335	-0.59909	1.67598	0.792301
11	76619497	76777440	bA30J7	-0.0159095	0.471355	NaN	-0.224983	0.0670921	-0.0975424	-0.154268	0.00430672
11	77204305	77366004	bA321B9	0.321854	0.0635145	0.670208	1.20661	0.309135	0.0205491	0.657613	0.261798
11	78034239	78206818	bA7H7	0.490018	0.282507	2.57664	1.07035	0.0622757	0.516271	0.280673	0.610806
11	78641711	78791818	bA153F6	-0.270707	0.0492338	0.516698	-0.218766	0.0531931	-0.0936905	-0.257072	0.265137
11	80181877	80362476	bA46D24	1.31518	-0.0512829	0.771589	0.969231	0.951122	1.80024	0.556009	-0.472976
11	80963068	81046067	bA187P2	0.469795	-0.225887	-0.651828	0.41581	0.332929	0.854685	0.327066	0.0858774
11	81847032	81988303	bA179A16	-0.434675	-0.136759	-0.0264694	-0.856926	-0.183723	-0.475962	0.0368259	0.181415
11	82971884	83126195	bA113K21	0.196403	0.0430487	-0.335018	0.939458	0.773635	0.39528	0.519485	1.19713
11	83021047	83205297	bA118L16	0.618019	-0.394626	-0.405999	-0.00201173	0.0826216	0.215287	0.201199	-0.303798
11	85282851	85453488	bA482L11	-0.393744	-0.446887	-1.34417	-1.43965	-0.342636	-0.55824	-0.0226968	-0.286855
11	85808594	85867593	bA90K17	-0.110352	-0.101654	0.204086	-0.078233	-0.428611	0.646221	-0.214078	0.104248
[truncated: 1,042 more rows]
